# Supplementary material for: Efficacy and neural mechanism of acupuncture treatment in older adults with subjective cognitive decline: study protocol for a randomised controlled clinical trial
Source: PubMed Central journal article supplement — BMJ Open. 2019 Oct 10;9(10):e028317. doi: 10.1136/bmjopen-2018-028317 (PMC6797373; doi:10.1136/bmjopen-2018-028317), 2019-10-10
Supplement: bmjopen-2018-028317.draft_revisions.pdf [file bmjopen-2018-028317.draft_revisions.pdf]

# BMJ Open

BMJ Open is committed to open peer review. As part of this commitment we make the peer review history of every article we publish publicly available.

When an article is published we post the peer reviewers' comments and the authors' responses online. We also post the versions of the paper that were used during peer review. These are the versions that the peer review comments apply to.

The versions of the paper that follow are the versions that were submitted during the peer review process. They are not the versions of record or the final published versions. They should not be cited or distributed as the published version of this manuscript.

BMJ Open is an open access journal and the full, final, typeset and author-corrected version of record of the manuscript is available on our site with no access controls, subscription charges or pay-per-view fees (<http://bmjopen.bmj.com>).

If you have any questions on BMJ Open's open peer review process please email [info.bmjopen@bmj.com](mailto:info.bmjopen@bmj.com)

# BMJ Open

## The efficacy and mechanism of acupuncture treatment in older adults with Subjective Cognitive Decline: study protocol for a randomized controlled clinical trial

|                               |                                                                                                                                                                                                                                                                                                                                                                                                                                                                                                                                                                                                                                                                                                                                                                                                                                                                                                                                                                                                                                                                                                                                                                                          |
|-------------------------------|------------------------------------------------------------------------------------------------------------------------------------------------------------------------------------------------------------------------------------------------------------------------------------------------------------------------------------------------------------------------------------------------------------------------------------------------------------------------------------------------------------------------------------------------------------------------------------------------------------------------------------------------------------------------------------------------------------------------------------------------------------------------------------------------------------------------------------------------------------------------------------------------------------------------------------------------------------------------------------------------------------------------------------------------------------------------------------------------------------------------------------------------------------------------------------------|
| Journal:                      | <i>BMJ Open</i>                                                                                                                                                                                                                                                                                                                                                                                                                                                                                                                                                                                                                                                                                                                                                                                                                                                                                                                                                                                                                                                                                                                                                                          |
| Manuscript ID                 | bmjopen-2018-028317                                                                                                                                                                                                                                                                                                                                                                                                                                                                                                                                                                                                                                                                                                                                                                                                                                                                                                                                                                                                                                                                                                                                                                      |
| Article Type:                 | Protocol                                                                                                                                                                                                                                                                                                                                                                                                                                                                                                                                                                                                                                                                                                                                                                                                                                                                                                                                                                                                                                                                                                                                                                                 |
| Date Submitted by the Author: | 04-Dec-2018                                                                                                                                                                                                                                                                                                                                                                                                                                                                                                                                                                                                                                                                                                                                                                                                                                                                                                                                                                                                                                                                                                                                                                              |
| Complete List of Authors:     | <p>Yan, Chao-qun; Beijing University of Chinese Medicine<br/>         Zhou, Ping; Beijing Hospital of Traditional Chinese Medicine Affiliated to Capital Medical University<br/>         Wang, Xu; Beijing University of Chinese Medicine, School of Life Sciences<br/>         Hu, Shang-Qing; Beijing University of Chinese Medicine<br/>         Tu, Jian Feng; Beijing Hospital of Traditional Chinese Medicine Affiliated to Capital Medical University<br/>         Huo, Jian-Wei; Beijing Hospital of Traditional Chinese Medicine Affiliated to Capital Medical University<br/>         Wang, Zhong-Yan; Beijing Hospital of Traditional Chinese Medicine Affiliated to Capital Medical University<br/>         Shi, Guangxia; Beijing Hospital of Traditional Chinese Medicine affiliated to Capital Medical University, Acupuncture and Moxibustion Department<br/>         Zhang, Ya-Nan; Beijing Hospital of Traditional Chinese Medicine Affiliated to Capital Medical University<br/>         Li, Jun-Qiu; Beijing Hospital of Traditional Chinese Medicine Affiliated to Capital Medical University<br/>         Liu, Cun-Zhi; Beijing University of Chinese Medicine</p> |
| Keywords:                     | Subjective cognitive decline, Dementia < NEUROLOGY, Acupuncture, Sham acupuncture, Magnetic resonance imaging < RADIOLOGY & IMAGING, Clinical trial                                                                                                                                                                                                                                                                                                                                                                                                                                                                                                                                                                                                                                                                                                                                                                                                                                                                                                                                                                                                                                      |
|                               |                                                                                                                                                                                                                                                                                                                                                                                                                                                                                                                                                                                                                                                                                                                                                                                                                                                                                                                                                                                                                                                                                                                                                                                          |

SCHOLARONE™  
Manuscripts

1  
2  
3 **The efficacy and mechanism of acupuncture treatment in older adults with Subjective**  
4 **Cognitive Decline: study protocol for a randomized controlled clinical trial**  
5

6  
7 Chao-Qun Yan<sup>1</sup>; Ping Zhou<sup>2</sup>; Xu-Wang<sup>3</sup>; Shang-Qing Hu<sup>1</sup>; Jian-Feng Tu<sup>2</sup>; Jian-Wei Huo<sup>4</sup>;  
8  
9 Zhong-Yan Wang<sup>4</sup>; Guang-Xia Shi<sup>2</sup>; Ya-Nan Zhang<sup>4</sup>; Jun-Qiu Li<sup>4</sup>; Cun-Zhi Liu<sup>1</sup>  
10

- 11  
12 1. School of Acupuncture-Moxibustion and Tuina, Beijing University of Chinese Medicine,  
13  
14 11 Beisanhuan East Road, Chaoyang District, Beijing 100029, China  
15  
16 2. Department of Acupuncture and Moxibustion, Beijing Hospital of Traditional Chinese  
17  
18 Medicine Affiliated to Capital Medical University, 23 Meishuguanhou Street,  
19  
20 Dongcheng District, Beijing 100010, China  
21  
22 3. School of Life Sciences, Beijing University of Chinese Medicine, 11 Beisanhuan East  
23  
24 Road, Chaoyang District, Beijing 100029, China  
25  
26 4. Department of Radiology, Beijing Hospital of Traditional Chinese Medicine affiliated to  
27  
28 Capital Medical University, 23 Meishuguanhou Street, Dongcheng District, Beijing  
29  
30 100010, China  
31  
32

33  
34 \*Corresponding author at:

35 School of Acupuncture-Moxibustion and Tuina, Beijing University of Chinese Medicine, 11  
36 Beisanhuan East Road, Chaoyang District, Beijing 100029, China.

37  
38 E-mail address: lcz\_tg@126.com  
39  
40

41  
42  
43 Word count: 4377  
44  
45  
46  
47  
48  
49  
50  
51  
52  
53  
54  
55  
56  
57  
58  
59  
60

## Abstract

**Background:** Subjective cognitive decline (SCD) is related to the decreased ability of memory and cognition in perception, while objective neuropsychological deficits are not observed. It provides an opportunity for dementia prevention. However, there is no effective treatments recommended for individuals with SCD. Acupuncture, as a non-pharmacologic intervention, has been widely employed for patients with cognitive disorders.

**Methods/Design:** The proposed study is a randomized, assessor-blind and placebo-controlled study to investigate the efficacy and mechanism of acupuncture in SCD. Sixty patients with SCD will be randomly allocated either into an acupuncture group or a sham acupuncture group. They will receive 24 sessions of real acupuncture treatment or identical treatment sessions using the placebo needle. Global cognitive change based on a comprehensive neuropsychological test battery will be evaluated to detect the clinical efficacy of acupuncture treatment at the baseline and the end of treatment. Magnetic Resonance Imaging (MRI) scans will be used to explore acupuncture related neuroplasticity changes. Correlation analyses will be performed to investigate the relationships between the changes in brain function and symptom improvement.

**Discussion:** This trial will investigate the effect of acupuncture in SCD patients. We will compare real acupuncture treatment with the sham acupuncture treatment by fMRI to verify neuroplasticity changes. The results of this trial may provide relevant evidences for acupuncture treatment on SCD and also reveal the underlying mechanisms of the treatment effect.

**Trial registration:** ClinicalTrials.gov NCT03444896. Retrospectively registered on 23 February 2018.

**Keywords:** Subjective cognitive decline; Dementia; Acupuncture; Sham acupuncture; Magnetic Resonance Imaging; Clinical trial

### Strengths and limitations of this study

Compared with the neuropsychological tests alone as efficacy evaluations, the combination with in-vivo measures of brain alternations in this study will be more sensitive in detecting acupuncture efficacy.

This study will firstly uncover the efficacy and mechanism of acupuncture treatment on the older people with SCD.

A comprehensive neuropsychological test battery will be employed, which can assess multiple cognitive domains including executive function, attention, visuospatial function, and language.

Sham needles and adhesive pads will be used for better patients blinding.

A potential limitation is that not a large sample size and no sample size estimates were performed in this study.

### INTRODUCTION

Dementia is the greatest global challenge for health and social care in the 21st century [1]. Globally, about 47 million people were living with dementia in 2015, and this number is projected to triple by 2050, based on the World Alzheimer Report (2015). Alzheimer's disease (AD) is the most common form of dementia [2]. Currently, there is no effective cure for AD, and the available treatments have only moderately alleviate symptoms [3]. Therefore, prevention is essential to reduce the dementia epidemic [4 5]. The long "preclinical" phase of AD provides an opportunity for targeted dementia prevention [6-8].

Subjective cognitive decline (SCD) usually occurs in healthy older adults, and it refers to the self-perception of cognitive decline, when individuals perform cognitive tests within normal limits and have preserved activities of daily living [9]. A review demonstrated that the prevalence of these complaints in persons aged 65 years or more varied from 25% to 50% [10]. Actually, many older adults who claim cognitive decline may have been regarded by healthcare professionals as hypochondriacs. However, several lines of evidence from longitudinal aging studies suggests that older adults with SCD are more likely than their healthy peers to present AD biomarkers. About 60% SCD individuals will decline to mild cognitive impairment (MCI) and AD over a 15-year period [11 12]. People with SCD have more brain abnormalities such as

1  
2  
3 hippocampal volume loss and hypometabolism compared with healthy controls [13]. Moreover,  
4 cerebrospinal amyloid  $\beta$  is strongly predictive of subsequent clinical progression in patients with  
5 SCD [14]. This suggests that, for some older adults, SCD may represent a preclinical phase of  
6  
7 AD.  
8  
9

10  
11 There is still much plasticity in SCD. The patients in this stage may not progress to dementia or  
12 even revert to no cognitive impairment after effective treatment. Development of safe and  
13 effective interventions in early AD stages is important. Specific criteria to define SCD have been  
14 published [9 15], but clinical trials in SCD are in their infancy, and no pharmacological treatment  
15 or interventions is currently recommended for individuals with SCD. Despite these difficulties,  
16 the development of new treatments must be encouraged [16].  
17  
18  
19  
20

21  
22 The accumulated evidence suggests that non-pharmacologic intervention may benefit cognitive  
23 function in older adults with SCD [17]. Acupuncture, as a non-pharmacologic intervention, that  
24 has been widely used for patients with cognitive disorders. The WHO reports that acupuncture  
25 treatment can be beneficial for vascular dementia. A number of clinical studies have provided  
26 evidence that acupuncture is beneficial for the treatment of dementia or MCI [18]. A systematic  
27 review supports the use of acupuncture for MCI [19]. Animal studies showed that acupuncture  
28 elicits its roles by mediation of neural plasticity in pathological conditions [20]. However, the  
29 efficacy of acupuncture in patients with SCD has not be investigated. An experimental design is  
30 needed to test this hypothesis.  
31  
32  
33  
34  
35  
36  
37

38 By definition, individuals with SCD are within normal range on clinical-neuropsychological tests.  
39 It will be difficult to detect response in this population compared with people who already have  
40 clinically manifest impairment (e.g., MCI) due to the ceiling effect. As such, neuropsychological  
41 tests in conjunction with in-vivo measures of brain function such as electroencephalo-graph, or  
42 functional magnetic resonance imaging (fMRI), may be a more sensitive alternative to  
43 neuropsychological tests [21-23]. Brain alterations are subtle but measurable to identify  
44 individuals at risk for AD well before cognitive symptoms are manifested by using fMRI,  
45 allowing researchers to use neuroimaging to ascertain response after intervention sensitivity [24].  
46 For better ascertaining the clinical response and unveiling the mechanism, brain alterations  
47 measured by fMRI could also be used to evaluate the efficacy of acupuncture.  
48  
49  
50  
51  
52  
53  
54  
55  
56  
57  
58  
59  
60

## OBJECTIVES

This study is a randomized controlled functional brain imaging trial with 12 weeks of treatment, aiming at: (1) evaluating the effects of acupuncture treatment on cognitive function in older adults with SCD; (2) exploring the central mechanism of the long-lasting effect of acupuncture on SCD; and (3) investigating the safety of acupuncture treatment on SCD.

## METHODS

### Design

This trial is a 1:1 randomized single-blinded, and placebo-controlled study with two parallel groups involving elderly adults. The study is designed to examine the effect and central mechanism of acupuncture treatment on cognitive function before and after 12 weeks intervention period. As shown in Figure 1, the cognitive assessments and MRI scans will be performed at baseline and immediately after the completion of the intervention.

### Ethics

General ethical approval has been obtained from the ethics committee of the Beijing Hospital of Traditional Chinese Medicine affiliated to Capital Medical University on 29 January, 2018 (Ref: 2017BL-061-02). The study was registered under [clinicaltrials.gov](http://clinicaltrials.gov) (NCT03444896). The CONSORT statement and the CONSORT statement for non-pharmacological interventions have been used as a framework for development of the methodology for this project [24 25]. If any modifications or decision are made, amendments will be reviewed and approved by the ethics committee, and new protocols would be uploaded to [Clinicaltrials.gov](http://Clinicaltrials.gov).

### Participants

The study will mainly take place in Dongcheng, Fengtai, and Shunyi District in Beijing. People with SCD will be recruited from community-dwelling population in those Districts. In order to have better insight into the trial for community residents, science popularization lectures about dementia and advertisement of the trial will be given in those community service centers. The brochures and posters will also be distributed. Besides, advertisement of the trial will be shared in the official account on WeChat (China's most popular social media platform) of the Beijing Hospital of Traditional Chinese Medicine affiliated to Capital Medical University and Dongfang

Hospital, Beijing University of Chinese Medicine, health web site (www.39.net) or local newspaper for recruiting participants. Interested individuals will be screened in the clinic, community service centers or by phone using the inclusion/exclusion criteria. All those who meet the inclusion criteria will receive a study information sheet including the design, procedure, benefits, and risks of the study. Before the study procedure started, the subjects will have to provide signed written informed consent forms.

### **Inclusion criteria**

- Male and female adults aged 55-75;
- Native Chinese speakers who are right-handed and have at least 8 years of education;
- Self-reported persistent memory decline compared with a previous normal status within the last 5 years, which was confirmed by caregivers;
- Normal age- and education-adjusted performance on neuropsychological test including the Chinese version of Mini-Mental State Examination (MMSE) [27], the auditory verbal learning test (the short-term delayed free recall, the long-term delayed free recall, and the recognition test) [28], Trail Making Test [29], and Animal Fluency Test [30].
- No or minimal impairment in activities of daily living;

### **Exclusion criteria**

- Presence of a positive neurologic history (e.g., traumatic brain injury, stroke, Parkinson's disease, multiple sclerosis);
- Treatments that would affect cognitive function;
- Presence of significant psychiatric history (e.g., bipolar disorder, schizophrenia) and/or severe anxiety and depression (a score of > 24 on the Hamilton depression rating scale or a score of > 29 on Hamilton anxiety scale);
- Presence of serious heart, kidney, liver, gastrointestinal, infectious, endocrine disease or cancer;
- History of alcohol or drug abuse/addiction;
- Any contraindications for MRI scans (e.g., aneurysm clip pacemaker);



- Significant visual and/or auditory impairment uncorrected by aids, and unable to perform neuropsychological evaluations;
- Currently enrolled in another research study;
- Received acupuncture treatment in the preceding month;

## Intervention

Patients will receive 24 acupuncture treatment sessions over 12 weeks. Hwato brand single-use acupuncture needles (size  $0.35 \times 25$  mm or  $0.35 \times 40$  mm), pragmatic placebo needles (size  $0.30 \times 25$  mm), and SDZ-V electroacupuncture apparatuses will be used.

For the acupuncture group (Figure 2), acupuncture needles will be placed at acupoints Baihui (DU20), Shengting (DU24), Fengfu (DU16), Fengchi(GB20), Danzhong (RN17), Zhongwan (RN12), Qihai (RN6), Neiguan (PC6), Tongli (HT5), Xuehai (SP10), Zusanli (ST36), Zhaohai (KI6), Xinshu (BL15), and Yixi (BL45). After skin disinfection in patient in the supine position, the adhesive pads are pasted on the acupoints surface except for Baihui (DU20) and Shengting (DU24). Then, the acupuncture needles will be inserted through the adhesive pads approximately 5 to 15 mm into the skin depending on the location of the needle. Manual acupuncture by acupuncturists using a small, equal manipulations of twirling, lifting, and thrusting will be performed on all needles to reach *deqi*. The patients will feel the *deqi* sensation, such as soreness, numbness, distention, heaviness, and other sensations. Paired electrodes from the electroacupuncture apparatus will be attached to the needle holders of the DU20 and DU24. A dilatational wave of 2-100 Hz and a current intensity of 1 to 5 mA will be performed following by the degree of needle handle shivering, ignoring the patient's feelings. The needles will be extracted after 20 minutes for each treatment. The acupoints of DU16, BL15 and BL45 will achieve *deqi* in patients with sitting position without retaining needle.

For the sham acupuncture group, sham acupoints at locations away from known acupuncture points will be used to minimize physiological effects, and the location of sham acupoints are showed in Table 1. Patients will receive noninsertive acupuncture using the pragmatic placebo needles (Hwato brand, size  $0.35 \times 25$  mm; supplement figure 1). As same as acupuncture group, the adhesive pads are firstly pasted on the sham acupoints surface except for sham acupoint 1. The pragmatic placebo needles with a blunt tip will be placed on the adhesive pads. In order to

minimize the physiological effect, acupuncturists will be instructed to lightly place the placebo needle on the adhesive pads with no manipulation. The acupuncture needle will be inserted to a shallow depth at the sham acupoint 1, which does not penetrate below the skin, and needle manipulation for *deqi*. Sham acupoint 11 and Sham acupoint 12 will be inserted with placebo needles without retaining needle. Paired electrodes will be attached the needle holders of the bilateral sham acupoint 2 but with no electricity output.

In the treatment session, the concomitant medications which taking by enrolled patients will be record such as aspirin, antihypertensive agents, and lipid-reducing agents. The enrolled patients who use of medications that may affect cognitive functioning, including tranquilizers, anti-anxiolytics, hypnotics, nootropics, and cholinomimetic agents will be discontinued.

**Table 1. Location of sham acupoints used in the sham acupuncture group.**

| Sham Acupoint    | Location                                                                                      |
|------------------|-----------------------------------------------------------------------------------------------|
| Sham acupoint 1  | Midpoint of Shuaigu (GB8) and Touwei (ST8)                                                    |
| Sham acupoint 2  | Midpoint of Touwei (ST8) and Yangbai(GB14)                                                    |
| Sham acupoint 3  | Midpoint between Tianyou (SJ16) and Tianrong(SI17)                                            |
| Sham acupoint 4  | 4 cun above the umbilicus and 1 cun right of the umbilical midline                            |
| Sham acupoint 5  | 2 cun below the umbilicus and 1 cun right of the umbilical midline                            |
| Sham acupoint 6  | 1 cun outside the point 1/4 of the line between Shenmen (HT7) and Shaohai (HT3)               |
| Sham acupoint 7  | 1 cun outside the midpoint of Shenmen (HT7) and Shaohai (HT3)                                 |
| Sham acupoint 8  | 6 cun above mediosuperior border of the patella                                               |
| Sham acupoint 9  | 3 cun below the Yanglingquan (GB34) and in the middle of the gallbladder and bladder channels |
| Sham acupoint 10 | Midpoint between Jiexi (ST 41) and Qiuxu (GB40)                                               |
| Sham acupoint 11 | 2 cun from the lower border of the spinous process of the fifth thoracic vertebra             |
| Sham acupoint 12 | 2 cun from the lower border of the spinous process of the sixth thoracic vertebra             |

## MRI protocol

1  
2  
3 Patients will undergo brain MRI at baseline and after treatments. The MRI scan will be  
4 performed with a 3.0 Tesla superconductor (Skyra, Siemens, Erlangen, Germany) in the Beijing  
5 Hospital of Traditional Chinese Medicine Affiliated to Capital Medical University. The  
6 parameters of sequences employed in this study are provided by China Association of Brain  
7 Imaging ([www.abimaging.org](http://www.abimaging.org)). Sagittal structural images will be acquired using a magnetization  
8 prepared rapid gradient echo (MP-RAGE) three-dimensional T1-weighted sequence with the  
9 following parameters: TR/TE = 2,530/2.98 ms, flip angle = 7°, inversion time = 1100 ms, matrix  
10 = 256 × 256, 1 mm slice thickness without slice gap. T2\*-weighted functional images will be  
11 collected using a gradient-echo echo-planar imaging sequence with the following parameters:  
12 repetition time = 3200 ms, echo time = 407 ms, flip angle = 120°.

21 Resting state-fMRI and task fMRI will perform using an echo planar imaging (EPI) sequence  
22 with the following parameters: TR/TE = 2,000/30 ms, flip angle = 90°, matrix = 64 × 64, slice  
23 thickness = 3.5 mm with 1 mm slice gap. Diffusion tensor imaging (DTI) will use a double spin-  
24 echo echo-planar imaging sequence (TR/TE = 12,000/77 ms, flip angle = 90°, Volume interval =  
25 12, 2 mm thick axial slices). ASL imaging of the whole brain is performed by use of a 3D  
26 pseudocontinuous ASL sequence (TR/TE = 5,000/ 15.92 ms, flip angle = 180°, Slice thickness =  
27 3.5 mm; labeling duration, number of slices = 40).

34 All scans will be reviewed qualitatively by a radiologist to screen for possible brain lesions or  
35 structural abnormalities. DTI images will be analyzed using the PANDA package [31]. The  
36 functional MRI data collected during the memory task and rest, and ASL data will be performed  
37 with the Resting-State fMRI (DPARF) toolbox and SPM8  
38 (<http://www.fil.ion.ucl.ac.uk/spm/software/spm8>) for MATLAB. Brain activation, connectivity  
39 changes, and cerebral blood flow will be compared between two groups before and after  
40 treatment.

## 46 **Outcome measures**

### 49 *Clinical outcome assessments*

51 Global cognitive function based on a composite score will be used to evaluate the clinical  
52 efficacy of acupuncture treatment at baseline, and at the end of the treatment. It will be computed  
53 by averaging z-scores from a comprehensive neuropsychological test battery that includes 6 tests.

1  
2  
3 Animal Fluency Test (AFT) that assess the language and executive function by examining  
4 categorical verbal fluency [30]. Trail Making Test (TMT) part A and B examines graphomotor  
5 speed, attention, and executive function [32]. Digit Symbol Substitution Test (DSST) is used to  
6 assess processing speed, attention and concentration [33]. Stroop color word test (SCWT) is a  
7 classic instrument for the assessment of selective attention, cognitive flexibility, cognitive  
8 inhibition, and information processing speed [34]. Auditory Verbal Learning Test (AVLT) a  
9 powerful neuropsychological test to assess episodic memory [35 36].

10  
11 All patients will do a subjective cognitive decline questionnaire (SCDQ) [37] to assess their  
12 degree of subjective cognitive decline. The Santa Barbara Sense of Direction Scale (SBSDS) [38]  
13 will be used to measure the ability in facial recognition and direction. Depressive, anxiety  
14 symptoms, and sleep quality are measured by Hamilton Rating Scale for Depression (HAMD)  
15 [39], Hamilton Rating Scale for Anxiety (HAMA) [40], and Pittsburgh Sleep Quality Index  
16 (PSQI) [41].

### 17 *Neuroplasticity assessments*

18  
19 In this study, neuroplasticity changes between two groups, as measured by fMRI both before and  
20 after the acupuncture treatment, will be used as outcome measures (Figure 3). Brain activity and  
21 functional connectivity will be assessed under a resting state and a memory task. Besides, group  
22 difference on cerebral blood flow and white matter integrity will be assessed by means of arterial  
23 spin labeling (ASL) or diffusion tensor imaging (DTI).

24  
25 *Memory task.* Before entering the fMRI scanner, patients will complete a practice version of  
26 fMRI paradigm. This practice task guarantees that the patients understand the rule of the memory  
27 task in the scanner. A blocked periodic design that incorporated alternating 1-back, and 2-back  
28 tasks will be used. Patients will view facial pictures, scene pictures or single digits (0–9, black on  
29 a white background). In the 1-back task, the patients are required to press a button when a facial  
30 picture, scene picture or digit appears that is the same as the one before. In the 2-back task, the  
31 patients are asked to press a response button if the current facial picture, scene picture or digit is  
32 the same as the one which was presented two trials before. The stimuli consisted of 17 blocks for  
33 236 seconds and are presented on a computer using MATLAB 8.6 (Mathworks, Inc., Natick, MA,  
34 USA) for 1 second, with an inter-stimulus interval of 1 second. Trial types within blocks are  
35 presented in pseudorandom order.

1  
2  
3 Once in the scanner, anatomical and functional scans will be performed. During the scanning all  
4 patients are asked to lie quietly in the scanner with their eyes open, trying to avoid thinking  
5 systematically, and moving as little as possible. In resting state fMRI scanning, the patients are  
6 instructed to view centrally placed fixation cross (+), and try to not think of anything. Two  
7 memory task runs will be conducted after T1 and resting state scans, then following by ASL, and  
8 DTI scans.  
9  
10  
11  
12  
13

### 14 **Apolipoprotein E genotyping**

15  
16 A TIANamp Blood DNA Kit (TIANGEN BIOTECH, Beijing, China) will be used to isolate  
17 High-molecular-weight DNA. The genotype of APOE will be detected by APOE Gene Detection  
18 Kit (Wuhan YZY Biopharma, Wuhan, China) with E2 and E4 reaction liquid. Genomic DNA  
19 and reaction liquid will be placed on a 7500 HT Fast Real-Time PCR (Applied Biosystems, Foster  
20 City, USA) with the following conditions: Uracil-N-Glycosylase treatment at 37 °C for 10  
21 minutes, denaturation at 95 °C for 5 minutes, followed by 40 cycles at 95 °C for 15 s and  
22 annealing at 60 °C for 60 s (acquiring the fluorescence signal in this step). According to the  
23 amplification plot, the genotype of APOE will be determined.  
24  
25  
26  
27  
28  
29  
30

### 31 **Safety and Monitoring**

32  
33 Treatment-related adverse events, including hematoma, bleeding, subcutaneous hemorrhage,  
34 serious pain, local infection and fatigue will be compared among patients in the acupuncture  
35 group and the sham acupuncture group, and will be documented at each treatment session.  
36 Severe adverse events will report to the relevant responsible person. The enrolled patients will  
37 signature in the diary card after each treatment for monitoring adherence. In order to ensure  
38 consistency, the neuropsychological tests and other assessment scales will be performed by the  
39 same researcher at baseline and the end of treatment. A professional staff will check the imaging  
40 data for quality and protocol conformity after each scanning session. Patients will undergo blood  
41 routine test and blood biochemical tests including blood glucose, homocysteine, total cholesterol,  
42 etc. before randomization and at the end of treatment.  
43  
44  
45  
46  
47  
48  
49  
50

### 51 **Sample size and blinding**

52  
53 Task fMRI studies characteristically include small sample size [42] and thus have a low  
54 statistical power. The statistically underpowered study by definition means that a study will have  
55  
56  
57  
58  
59  
60

1  
2  
3 less of a chance for detecting significant effects [43]. Therefore, power-based sample size will be  
4 calculated prior to fMRI data collection [44]. Fortunately, approaches for sample size  
5 calculations in studies using functional magnetic resonance imaging have been developed.  
6  
7

8  
9 By using the non-central random field theory, Hayasaka et al estimated that at least 12 subjects  
10 would be required to detect signals in either of the auditory cortices with at least 80% power [45].  
11 They also found that approximately 13 subjects would be required to detect signals in the  
12 auditory cortices with 80% power, when generated a sample size map based on the mock pilot  
13 analysis. Adopting a simulation-based method to calculate statistical power for group-level fMRI  
14 studies, Desmond and Glover found a minimum of 12 subjects are required to achieve 80%  
15 power at  $\alpha = 0.05$  at the single voxel level [46]. For a more realistic threshold, twice as many  
16 subjects are recommended to maintain this level of power after correcting for multiple  
17 comparisons. For a stricter alpha of 0.000002, approximately 25 subjects are needed. Mumford  
18 and Nichol recommended 20 subjects and a Type I error of  $\alpha = 0.005$  should probably be used,  
19 and this power calculation is based on a non-central T or F distribution [47]. We used the largest  
20 sample size of 25 for each group with an estimated dropout rate and loss of data due to head  
21 motion, then we planned to enroll 60 participants in the two groups.  
22  
23  
24  
25  
26  
27  
28  
29  
30  
31

32 Eligible patients will be randomly assigned into either the acupuncture or sham acupuncture  
33 group after signed written informed consent forms via a randomization system for clinical  
34 research using a 1:1 ratio with a block size of 6. The randomization list will be stored by a  
35 noninvolved investigator and out of reach and sight of the involved investigators. The patients,  
36 outcome assessors, and statisticians will be blinded to treatment allocation.  
37  
38  
39  
40

#### 41 **Data collection and management**

42  
43 At baseline, information of patients about age, sex, education, dominant hand, and medical  
44 history will be collected (Figure 4). For all patients that met the inclusion criteria, the  
45 neuropsychological tests will be performed before and after treatment in a quiet room by  
46 evaluators, who have been trained by Alliance of early AD. All of the MRI scans will be  
47 conducted in the same machine, and the operators have been technically trained by a professional  
48 engineer from the China Association of Brain Imaging. Blood samples will be collected in the  
49 morning and handled by 2 persons. After each treatment session, adverse event will be recorded  
50 in participant's diary card by acupuncturists.  
51  
52  
53  
54  
55  
56  
57  
58  
59  
60

1  
2  
3 A case report form (CRF) will be used to collect the clinical data for each patient, labeled by  
4 unique numeric identifier and recorded by a trained graduate student. The data in the CRF will  
5 be verified for accuracy, missing data, and data consistency by a clinical research associate.  
6  
7 Paper-based research data will be entered into an EpiData electronic database. For reducing  
8 errors in data entry, data will be entered independently twice by two independent people, and  
9 value pairs will then be compared for discordances, followed by resolution of discordances by  
10 referral to the original data source. The EpiData will export data in a Microsoft Excel  
11 spreadsheet formats. The data will be entered in an electronic Statistical Package SPSS software  
12 (SPSS 12.0 KO for Windows ©) for ease of statistical analysis.  
13  
14  
15  
16  
17  
18

## 19 **Statistical analysis**

### 20 *Clinical data analysis*

21  
22 In this study, per protocol analysis will be used. The per protocol population defined as all  
23 randomized patients who did not discontinue prematurely, completed the treatment and had MRI  
24 scans before and after treatment. Observation of histograms and normal probability plots and a  
25 Shapiro–Wilk test will be performed to determine the data whether followed a normal  
26 distribution. Distributed data will be described using means, standard deviations, and 95%  
27 confidence intervals (CIs). Clinical outcome analyses will be done with SPSS software (SPSS  
28 12.0 KO for Windows ©), with a significance level of 0.05, and all hypothesis tests are two-  
29 tailed.  
30  
31  
32  
33  
34  
35  
36  
37

38 Baseline demographic characteristics between the two groups will be analyzed with  $\chi^2$  test or  
39 Fisher's exact test for categorical measures, and with the T-test or Wilcoxon rank-sum test for  
40 continuous measures. The clinical outcome of the global cognitive function based on composite  
41 scores will be compared between the acupuncture group and sham acupuncture group. The  
42 composite scores will be created by converting all individual cognitive scores to standardized z  
43 scores. As previously described [48], we computed z-scores by subtracting the baseline group  
44 mean and dividing the baseline group standard deviation, and then averaging the standardized z  
45 scores across all tests. The general linear model will be used to examine change in cognitive  
46 scores. For the other outcomes, SCDQ, SBSDS, HAMD, HAMA, and PSQI will be analyzed  
47 with independent T-test if it agreed with normal distribution or Wilcoxon's signed rank test for  
48 normal distribution data. The statisticians who analyzed the data are blinded to the test settings.  
49  
50  
51  
52  
53  
54  
55  
56  
57  
58  
59  
60



### ***MRI data analysis***

For imaging data will be analyzed using DPABI toolkit performing on MATLAB 8.6 (Mathworks, Inc., Natick, MA, USA) to detect any changes in brain function due to acupuncture treatment. After data preprocessing, some graph theory-based or data driven approaches will be performed to investigate neuroplasticity between two groups, such as regional homogeneity, amplitude of low-frequency fluctuation, and voxel-wise degree centrality. A two-sample t-test will be conducted to investigate the differences in brain regions between acupuncture group and sham acupuncture group in the DPARSF software. Multiple comparisons will be used in order to better control a high inflated false positive rate. Pearson's correlation analysis will be performed to examine the association between the fMRI image data and clinical variables.

### **Public involvement and dissemination**

The participants can achieve the study results via social media and software. The results of the study will be published in a peer-reviewed academic journal and will also be disseminated electronically through conference presentations.

### **DISCUSSION**

SCD, as the initial phase of AD, could serve as a window of opportunity for interventions at early disease stages [23]. This study is planned as a randomized, assessor-blind, placebo-controlled trial to evaluate the efficacy and central mechanism of acupuncture treatment on SCD compared with the sham acupuncture group. To our knowledge, this trial is also the first study to investigate the effect of acupuncture on SCD patients.

This study has several strengths. First, we will assess patients with SCD on multiple levels, including comprehensive neuropsychological tests, functional brain alterations, cerebrovascular risk factors, and AOPE genotyping. This comprehensive assessment will be used to identify possible biomarkers involved in the effects of acupuncture in SCD.

Second, the neuropsychological assessment in the present study is a comprehensive neuropsychological test battery that included six tests, which can assess multiple cognitive domains including executive functions, attention, visuospatial functioning, and language. Memory decline associated with AD risk factors [49 50], and then most instruments were used to



1  
2  
3 measure SCD focus on memory [51]. However, it might be too restrictive to limit the SCD  
4 assessment to memory, in particular for atypical forms of AD [9 52]. In this study, multi-domain  
5 cognitive function will be assessed as well.  
6  
7

8  
9 Additionally, functional brain alterations will be used as an outcome measures. Compared with  
10 the neuropsychological tests alone, the combination of in-vivo measures of brain alternations in  
11 this study will be more sensitive in detecting acupuncture efficacy. Smaller training effects and  
12 ceiling effect will be found when using MRI [53]. Furthermore, it can be used as a tool to  
13 understand the mechanism of the acupuncture's effects. Functional MRI can identify whether  
14 neural efficiency is improved or the brain connectome is reorganized to achieve cognitive  
15 enhancement [54].  
16  
17  
18  
19  
20  
21

22 A potential limitation is that the patients in this study are recruited from community. Considering  
23 the research environment, individuals recruited from a memory clinic may have a higher  
24 probability of having preclinical AD. They had specific concerns sufficient to prompt a medical  
25 visit [15]. However, community based studies have shown some predictive value of SCD for  
26 cognitive decline and dementia [10 55]. Another potential limitation of our study is that it will  
27 not include a large sample size, and this problem may lead to a future study. The main feature of  
28 our study is to systemically investigate and analyze the central mechanisms of acupuncture  
29 treatment in patients with SCD. The findings may provide deeper insight into the benefits and  
30 mechanisms of acupuncture for patients with SCD.  
31  
32  
33  
34  
35  
36  
37

### 38 **Trial status**

39  
40 This trial is currently in the recruitment phase.  
41  
42  
43  
44  
45  
46  
47  
48  
49  
50  
51  
52  
53  
54  
55  
56  
57  
58  
59  
60

## Figure Legends

**Figure 1.** Flow chart.

**Figure 2.** Location of acupoints or sham acupoints in the trial. Abbreviation: SA Sham acupoint, DU20 Baihui, DU24 Shengting, DU16 Fengfu, GB20 Fengchi, RN17 Danzhong, RN12 Zhongwan, RN6 Qihai, PC6 Neiguan, HT5 Tongli, SP10 Xuehai, ST36 Zusanli, KI6 Zhaohai, BL15 Xinshu, BL45 Yixi.

**Figure 3.** Magnetic resonance imaging experiment paradigm and Illustrative diagram of the memory task.

**Figure 4.** Standard Protocol Items: Recommendations for Interventional Trials (SPIRIT) schedule of the trial.

**Supplement figure 1.** (a) The adhesive pads and sham needles with a blunt tip; (b) The adhesive pad was pasted on the surface of skin; (c) The sham needle was placed on the adhesive pad.

**List of abbreviations** SCD: Subjective Cognitive Decline; AD: Alzheimer's disease; MCI: Mild Cognitive Impairment; APOE: apolipoprotein E; MRI: Magnetic Resonance Imaging; AFT: Animal Fluency Test; TMT: Trail Making Test; DSST: Digit Symbol Substitution Test; SCWT: Stroop Color Word Test; AVLT: Auditory Verbal Learning Test; SCDQ: Subjective Cognitive Decline Questionnaire; SBSDS: Santa Barbara Sense of Direction Scale; HAMD: Hamilton Rating Scale for Depression; HAMA: Hamilton Rating Scale for Anxiety; PSQI: Pittsburgh Sleep Quality Index.

**Ethics approval and consent to participate** Ethics approval: The Research Ethical Committee of Beijing Hospital of Traditional Chinese Medicine Affiliated to Capital Medical University approved the trial. The methods were carried out in accordance with the Declaration of Helsinki. Informed written consent was obtained from each patient.

**Consent for publication** Not applicable.

**Availability of data and materials** Not applicable. This is a study protocol only and as such no unpublished data are available. The sponsor will access to the final trial dataset.

**Competing interests** The authors declare that they have no competing interests.

**Funding** This work was supported by the National Natural Science Foundation of China (Grant No. 81674055) and supported by the Fundamental Research Funds for the Central Universities (2017-JYB-JS-018). We declared the study was only supported by the governmental funding, and the study did not receive funding/assistance from a commercial organization.

**Authors' contributors** Conceived and designed the experiments: CZL and JWH. Performed the experiments: PZ, ZYW, CQY, GXS, SQH JQL, YNZ, XW, JFT. Wrote the paper: CQY, XW and CZL. All authors approved the final manuscript.

**Provenance and peer review** Not commissioned; externally peer reviewed.

## References

1. Livingston G, Sommerlad A, Orgeta V, et al. Dementia prevention, intervention, and care. *Lancet* 2017;**390**(10113):2673-734.
2. Delbeuck X, Van der Linden M, Collette F. Alzheimer's disease as a disconnection syndrome? *Neuropsychol Rev* 2003;**13**(2):79-92.
3. Ong SS, Doraiswamy PM, Lad EM. Controversies and Future Directions of Ocular Biomarkers in Alzheimer Disease. *JAMA neurology* 2018; **75**(6):650-651.
4. WHO. Dementia: a public health priority. Geneva: World Health Organization—Alzheimer's Disease International hwwimhpdrea.
5. G8 dementia summit declaration. <https://www.gov.uk/government/publications/g8-dementia-summit-agreements>.
6. Sperling RA, Aisen PS, Beckett LA, et al. Toward defining the preclinical stages of Alzheimer's disease: recommendations from the National Institute on Aging-Alzheimer's Association workgroups on diagnostic guidelines for Alzheimer's disease. *Alzheimers Dement* 2011;**7**(3):280-92.
7. Jack CR, Jr., Knopman DS, Jagust WJ, et al. Tracking pathophysiological processes in Alzheimer's disease: an updated hypothetical model of dynamic biomarkers. *Lancet Neurol* 2013;**12**(2):207-16.
8. Villemagne VL, Burnham S, Bourgeat P, et al. Amyloid beta deposition, neurodegeneration, and cognitive decline in sporadic Alzheimer's disease: a prospective cohort study. *Lancet Neurol* 2013;**12**(4):357-67.
9. Jessen F, Amariglio RE, van Boxtel M, et al. A conceptual framework for research on subjective cognitive decline in preclinical Alzheimer's disease. *Alzheimers Dement* 2014;**10**(6):844-52.
10. Jonker C, Geerlings MI, Schmand B. Are memory complaints predictive for dementia? A review of clinical and population-based studies. *Int J Geriatr Psychiatry* 2000;**15**(11):983-91.
11. Reisberg B, Gauthier S. Current evidence for subjective cognitive impairment (SCI) as the pre-mild cognitive impairment (MCI) stage of subsequently manifest *Alzheimer's disease*. *Int Psychogeriatr* 2008;**20**(1):1-16.
12. Stewart R. Subjective cognitive impairment. *Current opinion in psychiatry* 2012;**25**(6):445-50.
13. Scheef L, Spottke A, Daerr M, et al. Glucose metabolism, gray matter structure, and memory decline in subjective memory impairment. *Neurology* 2012;**79**(13):1332-9.
14. van Harten AC, Visser PJ, Pijnenburg YA, et al. Cerebrospinal fluid Abeta42 is the best predictor of clinical progression in patients with subjective complaints. *Alzheimers Dement* 2013;**9**(5):481-7.
15. Molinuevo JL, Rabin LA, Amariglio R, et al. Implementation of subjective cognitive decline criteria in research studies. *Alzheimers Dement* 2017;**13**(3):296-311.
16. Rabin LA, Smart CM, Amariglio RE. Subjective Cognitive Decline in Preclinical Alzheimer's Disease. *Annu Rev Clin Psychol* 2017;**13**:369-96.
17. Smart CM, Karr JE, Areshenkoff CN, et al. Non-Pharmacologic Interventions for Older Adults with Subjective Cognitive Decline: Systematic Review, Meta-Analysis, and Preliminary Recommendations. *Neuropsychol Rev* 2017;**27**(3):245-57.

18. Wang S, Yang H, Zhang J, et al. Efficacy and safety assessment of acupuncture and nimodipine to treat mild cognitive impairment after cerebral infarction: a randomized controlled trial. *BMC Complement Altern Med* 2016;**16**:361.
19. Deng M, Wang XF. Acupuncture for amnesic mild cognitive impairment: a meta-analysis of randomised controlled trials. *Acupunct Med* 2016;**34**(5):342-48.
20. Jiang DY, Lu HW. [Effect of electroacupuncture on the cognitive function and plasma antibodies against beta-amyloid protein in aged rats with ketamine anesthesia]. *Zhongguo Zhong Xi Yi Jie He Za Zhi* 2011;**31**(11):1502-5.
21. Campanella S. Why it is time to develop the use of cognitive event-related potentials in the treatment of psychiatric diseases. *Neuropsychiatr Dis Treat* 2013;**9**:1835-45.
22. de Waal H, Stam CJ, Lansbergen MM, et al. The effect of souvenaid on functional brain network organisation in patients with mild Alzheimer's disease: a randomised controlled study. *PLoS One* 2014;**9**(1):e86558.
23. Smart CM, Segalowitz SJ, Mulligan BP, et al. Mindfulness Training for Older Adults with Subjective Cognitive Decline: Results from a Pilot Randomized Controlled Trial. *J Alzheimers Dis* 2016;**52**(2):757-74.
24. Mathotaarachchi S, Pascoal TA, Shin M, et al. Identifying incipient dementia individuals using machine learning and amyloid imaging. *Neurobiol Aging* 2017;**59**:80-90.
25. Boutron I, Moher D, Altman DG, et al. Extending the CONSORT statement to randomized trials of nonpharmacologic treatment: explanation and elaboration. *Annals of internal medicine* 2008;**148**(4):295-309.
26. Schulz KF, Altman DG, Moher D, et al. CONSORT 2010 statement: updated guidelines for reporting parallel group randomised trials. *Int J Surg* 2011;**9**(8):672-7.
27. Jia JN ZJ, Xu J, Wei W, Chen X. The recommendation of diagnosis and treatment of cognitive impairment in Chinese elderly. *Chin J Geriatr.* 2014;**33**(8):817-825.
28. Zhao Q, Lv Y, Zhou Y, et al. Short-term delayed recall of auditory verbal learning test is equivalent to long-term delayed recall for identifying amnesic mild cognitive impairment. *PLoS One* 2012;**7**(12):e51157.
29. Zhao Q, Guo Q, Li F, et al. The Shape Trail Test: application of a new variant of the Trail making test. *PLoS One* 2013;**8**(2):e57333.
30. Yang L, Koyanagi A, Smith L, et al. Hand grip strength and cognitive function among elderly cancer survivors. *PLoS One* 2018;**13**(6):e0197909.
31. Cui Z, Zhong S, Xu P, et al. PANDA: a pipeline toolbox for analyzing brain diffusion images. *Front Hum Neurosci* 2013;**7**:42.
32. Bowie CR, Harvey PD. Administration and interpretation of the Trail Making Test. *Nat Protoc* 2006;**1**(5):2277-81.
33. Chen SP, Bhattacharya J, Pershing S. Association of Vision Loss With Cognition in Older Adults. *JAMA ophthalmology* 2017;**135**(9):963-70.
34. Rivera D, Perrin PB, Stevens LF, et al. Stroop Color-Word Interference Test: Normative data for the Latin American Spanish speaking adult population. *NeuroRehabilitation* 2015;**37**(4):591-624.
35. Moradi E, Hallikainen I, Hanninen T, et al. Rey's Auditory Verbal Learning Test scores can be predicted from whole brain MRI in Alzheimer's disease. *NeuroImage Clinical* 2017;**13**:415-27.

- 1
- 2
- 3
- 4 36. Thomas ML, Green MF, Helleman G, et al. Modeling Deficits From Early Auditory
- 5 Information Processing to Psychosocial Functioning in Schizophrenia. *JAMA psychiatry*
- 6 2017;**74**(1):37-46.
- 7 37. Rami L, Mollica MA, Garcia-Sanchez C, et al. The Subjective Cognitive Decline
- 8 Questionnaire (SCD-Q): a validation study. *J Alzheimers Dis* 2014;**41**(2):453-66.
- 9 38. Boccia M, Vecchione F, Piccardi L, et al. Effect of Cognitive Style on Learning and
- 10 Retrieval of Navigational Environments. *Front Pharmacol* 2017;**8**:496.
- 11 39. Raimo S, Trojano L, Spitaleri D, et al. Psychometric properties of the Hamilton Depression
- 12 Rating Scale in multiple sclerosis. *Qual Life Res* 2015;**24**(8):1973-80.
- 13 40. Hamilton M. The assessment of anxiety states by rating. *Br J Med Psychol* 1959;**32**(1):50-5.
- 14 41. Buysse DJ, Germain A, Moul DE, et al. Efficacy of brief behavioral treatment for chronic
- 15 insomnia in older adults. *Archives of internal medicine* 2011;**171**(10):887-95.
- 16 42. Lombardo MV, Auyeung B, Holt RJ, et al. Improving effect size estimation and statistical
- 17 power with multi-echo fMRI and its impact on understanding the neural systems
- 18 supporting mentalizing. *Neuroimage* 2016;**142**:55-66.
- 19 43. Button KS, Ioannidis JP, Mokrysz C, et al. Power failure: why small sample size undermines
- 20 the reliability of neuroscience. *Nat Rev Neurosci* 2013;**14**(5):365-76.
- 21 44. Guo Q, Thabane L, Hall G, et al. A systematic review of the reporting of sample size
- 22 calculations and corresponding data components in observational functional magnetic
- 23 resonance imaging studies. *Neuroimage* 2014;**86**:172-81.
- 24 45. Hayasaka S, Peiffer AM, Hugenschmidt CE, et al. Power and sample size calculation for
- 25 neuroimaging studies by non-central random field theory. *Neuroimage* 2007;**37**(3):721-
- 26 30.
- 27 46. Desmond JE, Glover GH. Estimating sample size in functional MRI (fMRI) neuroimaging
- 28 studies: statistical power analyses. *J Neurosci Methods* 2002;**118**(2):115-28.
- 29 47. Mumford JA, Nichols TE. Power calculation for group fMRI studies accounting for arbitrary
- 30 design and temporal autocorrelation. *Neuroimage* 2008;**39**(1):261-8.
- 31 48. Barnes DE, Santos-Modesitt W, Poelke G, et al. The Mental Activity and eXercise (MAX)
- 32 trial: a randomized controlled trial to enhance cognitive function in older adults. *JAMA*
- 33 *internal medicine* 2013;**173**(9):797-804.
- 34 49. Mormino EC, Betensky RA, Hedden T, et al. Amyloid and APOE epsilon4 interact to
- 35 influence short-term decline in preclinical Alzheimer disease. *Neurology*
- 36 2014;**82**(20):1760-7.
- 37 50. Doraiswamy PM, Sperling RA, Johnson K, et al. Florbetapir F 18 amyloid PET and 36-
- 38 month cognitive decline: a prospective multicenter study. *Mol Psychiatry*
- 39 2014;**19**(9):1044-51.
- 40 51. Rabin LA, Smart CM, Crane PK, et al. Subjective Cognitive Decline in Older Adults: An
- 41 Overview of Self-Report Measures Used Across 19 International Research Studies. *J*
- 42 *Alzheimers Dis* 2015;**48 Suppl 1**:S63-86.
- 43 52. Scheltens NM, Galindo-Garre F, Pijnenburg YA, et al. The identification of cognitive
- 44 subtypes in Alzheimer's disease dementia using latent class analysis. *J Neurol Neurosurg*
- 45 *Psychiatry* 2016;**87**(3):235-43.
- 46 53. Simon SS, Yokomizo JE, Bottino CM. Cognitive intervention in amnesic Mild Cognitive
- 47 Impairment: a systematic review. *Neurosci Biobehav Rev* 2012;**36**(4):1163-78.
- 48
- 49
- 50
- 51
- 52
- 53
- 54
- 55
- 56
- 57
- 58
- 59
- 60

- 1  
2  
3 54. Tang Y, Zhu Z, Liu Q, et al. The efficacy of Cognitive training in patients with VAsCular  
4 Cognitive Impairment, No dEmentia (the Cog-VACCINE study): study protocol for a  
5 randomized controlled trial. *Trials* 2016;**17**(1):392.  
6  
7 55. Reisberg B, Prichep L, Mosconi L, et al. The pre-mild cognitive impairment, subjective  
8 cognitive impairment stage of Alzheimer's disease. *Alzheimers Dement* 2008;**4**(1 Suppl  
9 1):S98-S108.  
10  
11  
12  
13  
14  
15  
16  
17  
18  
19  
20  
21  
22  
23  
24  
25  
26  
27  
28  
29  
30  
31  
32  
33  
34  
35  
36  
37  
38  
39  
40  
41  
42  
43  
44  
45  
46  
47  
48  
49  
50  
51  
52  
53  
54  
55  
56  
57  
58  
59  
60



1  
2  
3  
4  
5  
6  
7  
8  
9  
10  
11  
12  
13  
14  
15  
16  
17  
18  
19  
20  
21  
22  
23  
24  
25  
26  
27  
28  
29  
30  
31  
32  
33  
34  
35  
36  
37  
38  
39  
40  
41  
42  
43  
44  
45  
46  
47  
48  
49  
50  
51  
52  
53  
54  
55  
56  
57  
58  
59  
60

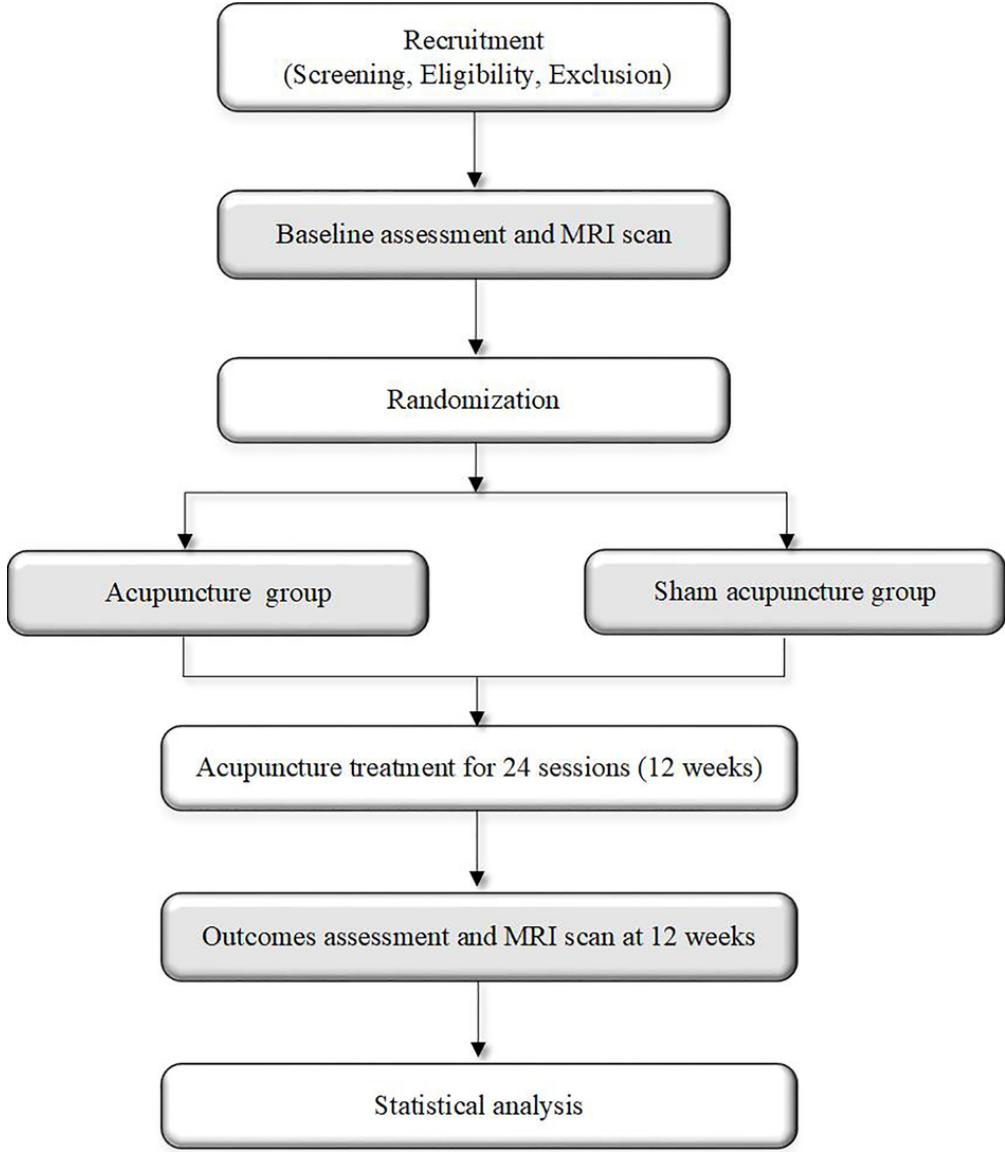

Flow chart.

80x93mm (300 x 300 DPI)

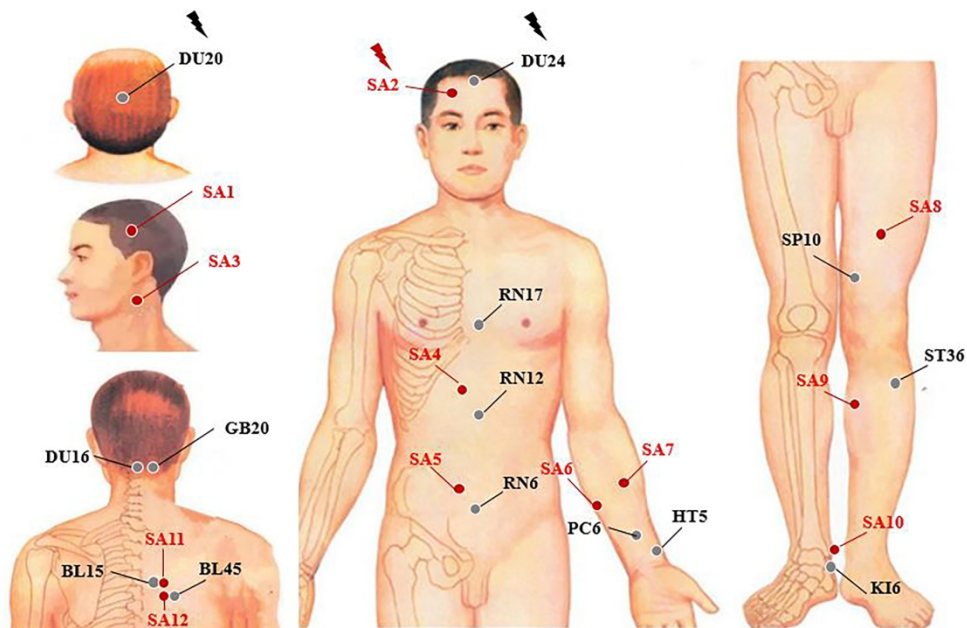

Location of acupoints or sham acupoints in the trial. Abbreviation: SA Sham acupoint, DU20 Baihui, DU24 Shengting, DU16 Fengfu, GB20 Fengchi, RN17 Danzhong, RN12 Zhongwan, RN6 Qihai, PC6 Neiguan, HT5 Tongli, SP10 Xuehai, ST36 Zusanli, KI6 Zhaohai , BL15 Xinshu, BL45 Yixi.

160x105mm (300 x 300 DPI)





| Study period              |          |        |                 |                    |
|---------------------------|----------|--------|-----------------|--------------------|
| Items                     | Baseline |        | Treatment phase | Outcome assessment |
| Time point                | -1 week  | 0 week | 1- 12 weeks     | 13-14 weeks        |
| <b>Enrolment</b>          |          |        |                 |                    |
| Eligibility screen        | X        |        |                 |                    |
| Informed consent          | X        |        |                 |                    |
| Examination               |          | X      |                 |                    |
| Randomization             |          | X      |                 |                    |
| <b>Intervention</b>       |          |        |                 |                    |
| Acupuncture (n = 30)      |          |        | X               |                    |
| Sham acupuncture (n = 30) |          |        | X               |                    |
| <b>MRI scan</b>           |          |        |                 |                    |
| Acupuncture               |          | X      |                 | X                  |
| Sham acupuncture          |          | X      |                 | X                  |
| <b>Assessment</b>         |          |        |                 |                    |
| AFT                       |          | X      |                 | X                  |
| TMT                       |          | X      |                 | X                  |
| DSST                      |          | X      |                 | X                  |
| SCWT                      |          | X      |                 | X                  |
| AVLT                      |          | X      |                 | X                  |
| SCDQ                      |          | X      |                 | X                  |
| SBSDS                     |          | X      |                 | X                  |
| HAMD                      |          | X      |                 | X                  |
| HAMA                      |          | X      |                 | X                  |
| PSQI                      |          | X      |                 | X                  |
| <b>Safety</b>             |          |        |                 |                    |
| Laboratory test           |          | X      |                 | X                  |
| Adverse events            |          |        | X               | X                  |

Standard Protocol Items: Recommendations for Interventional Trials (SPIRIT) schedule of the trial.

80x73mm (300 x 300 DPI)

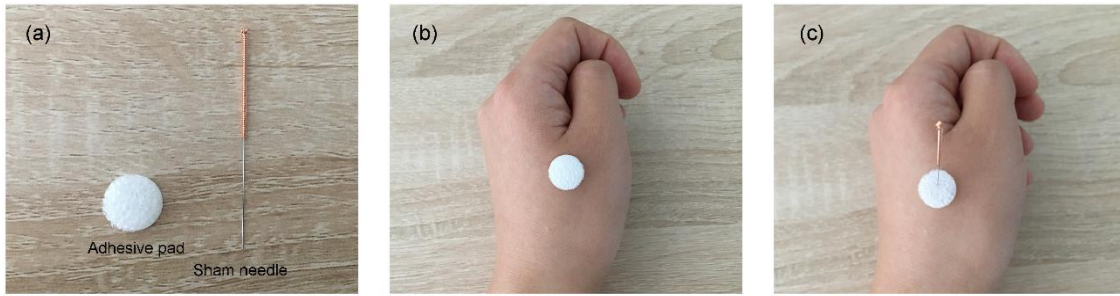

Supplement figure 1. Pictures of sham needle. (a) The adhesive pad and sham needle with a blunt tip; (b) The adhesive pad is pasted on the surface of skin; (c) The sham needle is placed on the adhesive pad.

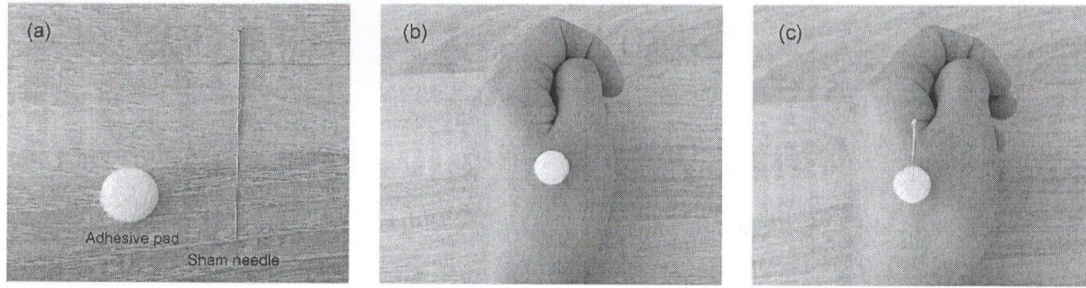

Supplement figure 1. Pictures of sham needle. (a) The adhesive pad and sham needle with a blunt tip; (b) The adhesive pad is pasted on the surface of skin; (c) The sham needle is placed on the adhesive pad.

## 同意书

适用于同意在英国医学杂志 (BMJ) 出版物中发表其图像和/或其信息的患者。

患者姓名: 闫超群

与患者的关系 (如果患者未签署本同意书): \_\_\_\_\_

关于患者的照片、图像、文字或其他材料 (材料) 的描述。应将这些材料的一份副本附在本同意书上: Pictures of sham needle.

将包含材料的文章的暂定标题: \_\_\_\_\_

同意

我 闫超群 [用正楷书写全名] 同意关于我/患者的材料出现在 BMJ 出版物中。

我确认我: (请在方框中打勾确认)

- 已看到关于我/患者的照片、图像、文字或其他材料。
- 已阅读了提交给 BMJ 的这篇文章
- 在法律上有权予以同意。

我明白以下内容:

- (1) 材料出版时不会附加我的/患者的姓名, 但是我明白, 不能保证材料完全匿名。可能某个地方的人——例如, 照顾我/患者的某人或其亲戚——可能会认出我/患者。
- (2) 材料可能会显示出或包含我的/患者的医疗状况或损伤以及我/患者现有的、已有的或将来会有的任何预后、治疗或手术的相关详细信息。
- (3) 文章可能会发表在一份在全球范围内发行的杂志上。BMJ 出版物的读者主要为医生和其他医疗保健专业人员, 但也有许多其他读者, 包括学者、学生和记者。
- (4) 包括材料在内的文章可能是一篇新闻稿的主题, 也可能与社交媒体关联, 和/或用于其他宣传活动中。文章一旦发表, 就会放在 BMJ 网站上, 可能还会在其他网站上提供。
- (5) 文章的文字在发表前会对文体、语法和一致性进行编辑。
- (6) 我/患者不会从文章发表中获得任何经济利益。
- (7) 也可能在 BMJ 和/或其他出版商出版的其他出版物中全部或部分使用文章。这包括 BMJ 或其他出版商现在和将来以英语和翻译、印刷品、数字形式和其他任何形式出版的出版物。文章可能出现在英国和海外发行的地方版刊物或其他出版物中。

患者同意书 031117





(8) 我可以在出版之前随时撤销我的同意，但是一旦文章已经准备好出版（“已付印”），则不能撤销同意。

(9) BMJ 会按照法律的要求，安全和保密地保存同意书，直至不再有必要这样做为止。

请在方框中打勾确认如下内容：

我同意 BMJ 仅出于以后在必要时联系我的目的保存我的联系方式（包括在欧洲经济区 [EEA] 以外）。

当本同意与在 *BMJ 病例报告* 中的一篇文章相关时，我/患者有机会对该文章做出评论，我对该评论（如有）已在文章中得到反映感到满意。

签名： 闫超群 正楷书写姓名： 闫超群

地址： 北京市朝阳区北三环本 电子邮箱地址： yan.chaoqun.857@126.com

路11号 电话号码： 18810862051

如果代表患者签字，请给出患者不能自己予以同意的理由（例如，患者死亡，年龄在 18 岁以下，或患有认知或智力障碍）。

日期： 2018.12.4

如果您是为一个家庭或其他团体签名，请在方框中打勾，以确认该家庭或团体的所有相关成员均被告知

如果患者为 7 岁或更大年龄的儿童，他们也必须确认他们同意这样做：

签名： \_\_\_\_\_ 正楷书写姓名： \_\_\_\_\_

出生日期： \_\_\_\_\_ 日期： \_\_\_\_\_

向患者或其代表（例如相应的作者或有权获得同意的其他人）解释和给予同意书之人的详细信息。

签名： 屠建锋 正楷书写姓名： 屠建锋

职务： 无 地址： 北京市东城区美术馆后街23号

研究单位： 首都医科大学附属

北京中医医院

电子邮箱地址： tujianfeng@126.com 电话号码： 15210516192

日期： 2018.12.4

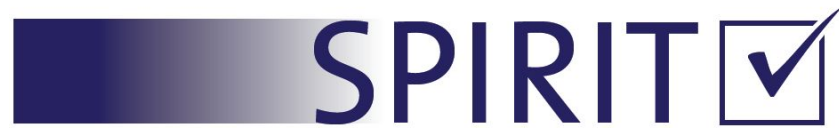

STANDARD PROTOCOL ITEMS: RECOMMENDATIONS FOR INTERVENTIONAL TRIALS

### SPIRIT 2013 Checklist: Recommended items to address in a clinical trial protocol and related documents\*

| Section/item                      | Item No | Description                                                                                                                                                                                                                                                                              | Page          |
|-----------------------------------|---------|------------------------------------------------------------------------------------------------------------------------------------------------------------------------------------------------------------------------------------------------------------------------------------------|---------------|
| <b>Administrative information</b> |         |                                                                                                                                                                                                                                                                                          |               |
| Title                             | 1       | Descriptive title identifying the study design, population, interventions, and, if applicable, trial acronym                                                                                                                                                                             | 5             |
| Trial registration                | 2a      | Trial identifier and registry name. If not yet registered, name of intended registry                                                                                                                                                                                                     | 5             |
|                                   | 2b      | All items from the World Health Organization Trial Registration Data Set                                                                                                                                                                                                                 | Not statement |
| Protocol version                  | 3       | Date and version identifier                                                                                                                                                                                                                                                              | 5             |
| Funding                           | 4       | Sources and types of financial, material, and other support                                                                                                                                                                                                                              | 16            |
| Roles and responsibilities        | 5a      | Names, affiliations, and roles of protocol contributors                                                                                                                                                                                                                                  | 5,14          |
|                                   | 5b      | Name and contact information for the trial sponsor                                                                                                                                                                                                                                       | 1             |
|                                   | 5c      | Role of study sponsor and funders, if any, in study design; collection, management, analysis, and interpretation of data; writing of the report; and the decision to submit the report for publication, including whether they will have ultimate authority over any of these activities | 14            |
|                                   | 5d      | Composition, roles, and responsibilities of the coordinating centre, steering committee, endpoint adjudication committee, data management team, and other individuals or groups overseeing the trial, if applicable (see Item 21a for data monitoring committee)                         | 11,12         |

## SPIRIT 2013 Checklist: Recommended items to address in a clinical trial protocol and related documents\*(continued)

| Section/item                                              | Item No | Description                                                                                                                                                                                               | Page |
|-----------------------------------------------------------|---------|-----------------------------------------------------------------------------------------------------------------------------------------------------------------------------------------------------------|------|
| <b>Introduction</b>                                       |         |                                                                                                                                                                                                           |      |
| Background and rationale                                  | 6a      | Description of research question and justification for undertaking the trial, including summary of relevant studies (published and unpublished) examining benefits and harms for each intervention        | 3–4  |
|                                                           | 6b      | Explanation for choice of comparators                                                                                                                                                                     | 4    |
| Objectives                                                | 7       | Specific objectives or hypotheses                                                                                                                                                                         | 4    |
| Trial design                                              | 8       | Description of trial design including type of trial (eg, parallel group, crossover, factorial, single group), allocation ratio, and framework (eg, superiority, equivalence, noninferiority, exploratory) | 5    |
| <b>Methods: Participants, interventions, and outcomes</b> |         |                                                                                                                                                                                                           |      |
| Study setting                                             | 9       | Description of study settings (eg, community clinic, academic hospital) and list of countries where data will be collected. Reference to where list of study sites can be obtained                        | 5    |
| Eligibility criteria                                      | 10      | Inclusion and exclusion criteria for participants. If applicable, eligibility criteria for study centres and individuals who will perform the interventions (eg, surgeons, psychotherapists)              | 6    |
| Interventions                                             | 11a     | Interventions for each group with sufficient detail to allow replication, including how and when they will be administered                                                                                | 7–8  |
|                                                           | 11b     | Criteria for discontinuing or modifying allocated interventions for a given trial participant (eg, drug dose change in response to harms, participant request, or improving/worsening disease)            | 8    |



**SPIRIT 2013 Checklist: Recommended items to address in a clinical trial protocol and related documents\*(continued)**

| Section/item         | Item No | Description                                                                                                                                                                                                                                                                                                                                                                    | Page               |
|----------------------|---------|--------------------------------------------------------------------------------------------------------------------------------------------------------------------------------------------------------------------------------------------------------------------------------------------------------------------------------------------------------------------------------|--------------------|
|                      | 11c     | Strategies to improve adherence to intervention protocols, and any procedures for monitoring adherence (eg, drug tablet return, laboratory tests)                                                                                                                                                                                                                              | 11                 |
|                      | 11d     | Relevant concomitant care and interventions that are permitted or prohibited during the trial                                                                                                                                                                                                                                                                                  | 8                  |
| Outcomes             | 12      | Primary, secondary, and other outcomes, including the specific measurement variable (eg, systolic blood pressure), analysis metric (eg, change from baseline, final value, time to event), method of aggregation (eg, median, proportion), and time point for each outcome. Explanation of the clinical relevance of chosen efficacy and harm outcomes is strongly recommended | 9–11               |
| Participant timeline | 13      | Time schedule of enrolment, interventions (including any run-ins and washouts), assessments, and visits for participants. A schematic diagram is highly recommended (see Figure)                                                                                                                                                                                               | Figure 1, Figure 4 |
| Sample size          | 14      | Estimated number of participants needed to achieve study objectives and how it was determined, including clinical and statistical assumptions supporting any sample size calculations                                                                                                                                                                                          | 11,12              |
| Recruitment          | 15      | Strategies for achieving adequate participant enrolment to reach target sample size                                                                                                                                                                                                                                                                                            | 5                  |

**Methods: Assignment of interventions (for controlled trials)**

## Allocation:

|                     |     |                                                                                                                                                                                                                                                                                                                                                          |    |
|---------------------|-----|----------------------------------------------------------------------------------------------------------------------------------------------------------------------------------------------------------------------------------------------------------------------------------------------------------------------------------------------------------|----|
| Sequence generation | 16a | Method of generating the allocation sequence (eg, computer-generated random numbers), and list of any factors for stratification. To reduce predictability of a random sequence, details of any planned restriction (eg, blocking) should be provided in a separate document that is unavailable to those who enrol participants or assign interventions | 12 |
|---------------------|-----|----------------------------------------------------------------------------------------------------------------------------------------------------------------------------------------------------------------------------------------------------------------------------------------------------------------------------------------------------------|----|

**SPIRIT 2013 Checklist: Recommended items to address in a clinical trial protocol and related documents\*(continued)**

| Section/item                                              | Item No | Description                                                                                                                                                                                                                                                                                                                                                                                                  | Page           |
|-----------------------------------------------------------|---------|--------------------------------------------------------------------------------------------------------------------------------------------------------------------------------------------------------------------------------------------------------------------------------------------------------------------------------------------------------------------------------------------------------------|----------------|
| Allocation concealment mechanism                          | 16b     | Mechanism of implementing the allocation sequence (eg, central telephone; sequentially numbered, opaque, sealed envelopes), describing any steps to conceal the sequence until interventions are assigned                                                                                                                                                                                                    | 12             |
| Implementation                                            | 16c     | Who will generate the allocation sequence, who will enrol participants, and who will assign participants to interventions                                                                                                                                                                                                                                                                                    | 12             |
| Blinding (masking)                                        | 17a     | Who will be blinded after assignment to interventions (eg, trial participants, care providers, outcome assessors, data analysts), and how                                                                                                                                                                                                                                                                    | 12             |
|                                                           | 17b     | If blinded, circumstances under which unblinding is permissible, and procedure for revealing a participant's allocated intervention during the trial                                                                                                                                                                                                                                                         | Not applicable |
| <b>Methods: Data collection, management, and analysis</b> |         |                                                                                                                                                                                                                                                                                                                                                                                                              |                |
| Data collection methods                                   | 18a     | Plans for assessment and collection of outcome, baseline, and other trial data, including any related processes to promote data quality (eg, duplicate measurements, training of assessors) and a description of study instruments (eg, questionnaires, laboratory tests) along with their reliability and validity, if known. Reference to where data collection forms can be found, if not in the protocol | 12-13          |
|                                                           | 18b     | Plans to promote participant retention and complete follow-up, including list of any outcome data to be collected for participants who discontinue or deviate from intervention protocols                                                                                                                                                                                                                    | Not applicable |
| Data management                                           | 19      | Plans for data entry, coding, security, and storage, including any related processes to promote data quality (eg, double data entry; range checks for data values). Reference to where details of data management procedures can be found, if not in the protocol                                                                                                                                            | 12-13          |
| Statistical methods                                       | 20a     | Statistical methods for analysing primary and secondary outcomes. Reference to where other details of the statistical analysis plan can be found, if not in the protocol                                                                                                                                                                                                                                     | 13-14          |

**SPIRIT 2013 Checklist: Recommended items to address in a clinical trial protocol and related documents\*(continued)**

1  
2  
3  
4  
5  
6  
7  
8  
9  
10  
11  
12  
13  
14  
15  
16  
17  
18  
19  
20  
21  
22  
23  
24  
25  
26  
27  
28  
29  
30  
31  
32  
33  
34  
35  
36  
37  
38  
39  
40  
41  
42  
43  
44  
45  
46

| Section/item                    | Item No | Description                                                                                                                                                                                                                                                                                                                           | Page           |
|---------------------------------|---------|---------------------------------------------------------------------------------------------------------------------------------------------------------------------------------------------------------------------------------------------------------------------------------------------------------------------------------------|----------------|
|                                 | 20b     | Methods for any additional analyses (eg, subgroup and adjusted analyses)                                                                                                                                                                                                                                                              | 13-14          |
|                                 | 20c     | Definition of analysis population relating to protocol non-adherence (eg, as randomised analysis), and any statistical methods to handle missing data (eg, multiple imputation)                                                                                                                                                       | 13             |
| <b>Methods: Monitoring</b>      |         |                                                                                                                                                                                                                                                                                                                                       |                |
| Data monitoring                 | 21a     | Composition of data monitoring committee (DMC); summary of its role and reporting structure; statement of whether it is independent from the sponsor and competing interests; and reference to where further details about its charter can be found, if not in the protocol. Alternatively, an explanation of why a DMC is not needed | Not statement  |
|                                 | 21b     | Description of any interim analyses and stopping guidelines, including who will have access to these interim results and make the final decision to terminate the trial                                                                                                                                                               | 8              |
| Harms                           | 22      | Plans for collecting, assessing, reporting, and managing solicited and spontaneously reported adverse events and other unintended effects of trial interventions or trial conduct                                                                                                                                                     | 11             |
| Auditing                        | 23      | Frequency and procedures for auditing trial conduct, if any, and whether the process will be independent from investigators and the sponsor                                                                                                                                                                                           | Not applicable |
| <b>Ethics and dissemination</b> |         |                                                                                                                                                                                                                                                                                                                                       |                |
| Research ethics approval        | 24      | Plans for seeking research ethics committee/institutional review board (REC/IRB) approval                                                                                                                                                                                                                                             | 5              |
| Protocol amendments             | 25      | Plans for communicating important protocol modifications (eg, changes to eligibility criteria, outcomes, analyses) to relevant parties (eg, investigators, REC/IRBs, trial participants, trial registries, journals, regulators)                                                                                                      | 5              |

**SPIRIT 2013 Checklist: Recommended items to address in a clinical trial protocol and related documents\*(continued)**

| Section/item                  | Item No | Description                                                                                                                                                                                                                                                                         | Page           |
|-------------------------------|---------|-------------------------------------------------------------------------------------------------------------------------------------------------------------------------------------------------------------------------------------------------------------------------------------|----------------|
| Consent or assent             | 26a     | Who will obtain informed consent or assent from potential trial participants or authorised surrogates, and how (see Item 32)                                                                                                                                                        | 6              |
|                               | 26b     | Additional consent provisions for collection and use of participant data and biological specimens in ancillary studies, if applicable                                                                                                                                               | 6              |
| Confidentiality               | 27      | How personal information about potential and enrolled participants will be collected, shared, and maintained in order to protect confidentiality before, during, and after the trial                                                                                                | 12-13          |
| Declaration of interests      | 28      | Financial and other competing interests for principal investigators for the overall trial and each study site                                                                                                                                                                       | 16             |
| Access to data                | 29      | Statement of who will have access to the final trial dataset, and disclosure of contractual agreements that limit such access for investigators                                                                                                                                     | 16             |
| Ancillary and post-trial care | 30      | Provisions, if any, for ancillary and post-trial care, and for compensation to those who suffer harm from trial participation                                                                                                                                                       | Not applicable |
| Dissemination policy          | 31a     | Plans for investigators and sponsor to communicate trial results to participants, healthcare professionals, the public, and other relevant groups (eg, via publication, reporting in results databases, or other data sharing arrangements), including any publication restrictions | 14             |
|                               | 31b     | Authorship eligibility guidelines and any intended use of professional writers                                                                                                                                                                                                      | Not applicable |
|                               | 31c     | Plans, if any, for granting public access to the full protocol, participant-level dataset, and statistical code                                                                                                                                                                     | Not applicable |

1  
2  
3  
4  
5  
6  
7  
8  
9  
10  
11  
12  
13  
14  
15  
16  
17  
18  
19  
20  
21  
22  
23  
24  
25  
26  
27  
28  
29  
30  
31  
32  
33  
34  
35  
36  
37  
38  
39  
40  
41  
42  
43  
44  
45  
46

**SPIRIT 2013 Checklist: Recommended items to address in a clinical trial protocol and related documents\*(continued)**

| Section/item               | Item No | Description                                                                                                                                                                                    | Page                        |
|----------------------------|---------|------------------------------------------------------------------------------------------------------------------------------------------------------------------------------------------------|-----------------------------|
| <b>Appendices</b>          |         |                                                                                                                                                                                                |                             |
| Informed consent materials | 32      | Model consent form and other related documentation given to participants and authorised surrogates                                                                                             | Not offer in the manuscript |
| Biological specimens       | 33      | Plans for collection, laboratory evaluation, and storage of biological specimens for genetic or molecular analysis in the current trial and for future use in ancillary studies, if applicable | Not applicable              |

\*It is strongly recommended that this checklist be read in conjunction with the SPIRIT 2013 Explanation & Elaboration for important clarification on the items. Amendments to the protocol should be tracked and dated. The SPIRIT checklist is copyrighted by the SPIRIT Group under the Creative Commons "[Attribution-NonCommercial-NoDerivs 3.0 Unported](https://creativecommons.org/licenses/by-nc-nd/3.0/)" license.

# BMJ Open

## The efficacy and neural mechanism of acupuncture treatment in older adults with Subjective Cognitive Decline: study protocol for a randomized controlled clinical trial

|                                 |                                                                                                                                                                                                                                                                                                                                                                                                                                                                                                                                                                                                                                                                                                                                                                                                                                                                                                                                                                                                                                                                                             |
|---------------------------------|---------------------------------------------------------------------------------------------------------------------------------------------------------------------------------------------------------------------------------------------------------------------------------------------------------------------------------------------------------------------------------------------------------------------------------------------------------------------------------------------------------------------------------------------------------------------------------------------------------------------------------------------------------------------------------------------------------------------------------------------------------------------------------------------------------------------------------------------------------------------------------------------------------------------------------------------------------------------------------------------------------------------------------------------------------------------------------------------|
| Journal:                        | <i>BMJ Open</i>                                                                                                                                                                                                                                                                                                                                                                                                                                                                                                                                                                                                                                                                                                                                                                                                                                                                                                                                                                                                                                                                             |
| Manuscript ID                   | bmjopen-2018-028317.R1                                                                                                                                                                                                                                                                                                                                                                                                                                                                                                                                                                                                                                                                                                                                                                                                                                                                                                                                                                                                                                                                      |
| Article Type:                   | Protocol                                                                                                                                                                                                                                                                                                                                                                                                                                                                                                                                                                                                                                                                                                                                                                                                                                                                                                                                                                                                                                                                                    |
| Date Submitted by the Author:   | 08-Jul-2019                                                                                                                                                                                                                                                                                                                                                                                                                                                                                                                                                                                                                                                                                                                                                                                                                                                                                                                                                                                                                                                                                 |
| Complete List of Authors:       | Yan, Chao-qun; Beijing University of Chinese Medicine, Acupuncture-Moxibustion and Tuina Beijing<br>Zhou, Ping; Beijing University of Chinese Medicine, School of Acupuncture-Moxibustion and Tuina<br>Wang, Xu; Beijing University of Chinese Medicine, School of Life Sciences<br>Tu, Jian Feng; Beijing University of Chinese Medicine, School of Acupuncture-Moxibustion and Tuina<br>Hu, Shang-Qing; Beijing University of Chinese Medicine, School of Acupuncture-Moxibustion and Tuina<br>Huo, Jian-Wei; Capital Medical University, Beijing Hospital of Traditional Chinese Medicine<br>Wang, Zhong-Yan; Capital Medical University, Beijing Hospital of Traditional Chinese<br>Shi, Guangxia; Beijing University of Chinese Medicine, School of Acupuncture-Moxibustion and Tuina<br>Zhang, Ya-Nan; Capital Medical University, Beijing Hospital of Traditional Chinese Medicine<br>Li, Jun-Qiu; Capital Medical University, Beijing Hospital of Traditional Chinese Medicine<br>Liu, Cun-Zhi; Beijing University of Chinese Medicine, School of Acupuncture-Moxibustion and Tuina |
| <b>Primary Subject Heading</b>: | Neurology                                                                                                                                                                                                                                                                                                                                                                                                                                                                                                                                                                                                                                                                                                                                                                                                                                                                                                                                                                                                                                                                                   |
| Secondary Subject Heading:      | Neurology                                                                                                                                                                                                                                                                                                                                                                                                                                                                                                                                                                                                                                                                                                                                                                                                                                                                                                                                                                                                                                                                                   |
| Keywords:                       | Subjective cognitive decline, Dementia < NEUROLOGY, Acupuncture, Sham acupuncture, Magnetic resonance imaging < RADIOLOGY & IMAGING, Clinical trial                                                                                                                                                                                                                                                                                                                                                                                                                                                                                                                                                                                                                                                                                                                                                                                                                                                                                                                                         |
|                                 |                                                                                                                                                                                                                                                                                                                                                                                                                                                                                                                                                                                                                                                                                                                                                                                                                                                                                                                                                                                                                                                                                             |

SCHOLARONE™  
Manuscripts

1  
2  
3 **The efficacy and neural mechanism of acupuncture treatment in older adults with**  
4 **Subjective Cognitive Decline: study protocol for a randomized controlled clinical trial**  
5

6  
7 Chao-Qun Yan<sup>1</sup>; Ping Zhou<sup>1</sup>; Xu-Wang<sup>2</sup>; Jian-Feng Tu<sup>1</sup>; Shang-Qing Hu<sup>1</sup>; Jian-Wei Huo<sup>3</sup>;  
8  
9 Zhong-Yan Wang<sup>3</sup>; Guang-Xia Shi<sup>1</sup>; Ya-Nan Zhang<sup>3</sup>; Jun-Qiu Li<sup>3</sup>; Cun-Zhi Liu<sup>1</sup>  
10

- 11  
12 1. School of Acupuncture-Moxibustion and Tuina, Beijing University of Chinese Medicine,  
13  
14 11 Beisanhuan East Road, Chaoyang District, Beijing 100029, China  
15  
16 2. School of Life Sciences, Beijing University of Chinese Medicine, 11 Beisanhuan East  
17  
18 Road, Chaoyang District, Beijing 100029, China  
19  
20 3. Department of Radiology, Beijing Hospital of Traditional Chinese Medicine affiliated to  
21  
22 Capital Medical University, 23 Meishuguanhou Street, Dongcheng District, Beijing  
23  
24 100010, China  
25

26  
27 \*Corresponding author at:

28  
29 School of Acupuncture-Moxibustion and Tuina, Beijing University of Chinese Medicine, 11  
30 Beisanhuan East Road, Chaoyang District, Beijing 100029, China.

31  
32 E-mail address: lcz\_tg@126.com  
33

34  
35  
36 Word count: 5073  
37  
38  
39  
40  
41  
42  
43  
44  
45  
46  
47  
48  
49  
50  
51  
52  
53  
54  
55  
56  
57  
58  
59  
60

## Abstract

**Background:** Subjective cognitive decline (SCD) refers to individuals' perceived decline in memory and/or other cognitive abilities relative to their previous level of performance, while objective neuropsychological deficits are not observed. SCD may represent a preclinical phase of Alzheimer's disease. At this very early stage of decline, intervention could slow the rate of incipient decline to prolong and preserve cognitive and functional abilities. However, there is no effective treatments recommended for individuals with SCD. Acupuncture, as a non-pharmacologic intervention, has been widely employed for patients with cognitive disorders.

**Methods/Design:** The proposed study is a randomized, assessor-blinded and placebo-controlled study to investigate the efficacy and mechanism of acupuncture in SCD. Sixty patients with SCD will be randomly allocated either into an acupuncture group or a sham acupuncture group. They will receive 24 sessions of real acupuncture treatment or identical treatment sessions using a placebo needle. Global cognitive changes based on a multi-domain neuropsychological test battery will be evaluated to detect the clinical efficacy of acupuncture treatment at baseline and end of treatment. Magnetic Resonance Imaging (MRI) scans will be used to explore acupuncture related neuroplasticity changes. Correlation analyses will be performed to investigate the relationships between the changes in brain function and symptom improvement.

**Discussion:** This trial will investigate the effect of acupuncture in SCD patients. We will compare real acupuncture treatment with the sham acupuncture treatment by fMRI to verify neuroplasticity changes. The results of this trial may provide relevant evidences for acupuncture treatment on SCD and also reveal the underlying mechanisms of the treatment effect.

**Trial registration:** ClinicalTrials.gov NCT034444896. Retrospectively registered on 23 February 2018.

**Keywords:** Subjective cognitive decline; Dementia; Acupuncture; Sham acupuncture; Magnetic Resonance Imaging; Clinical trial



### Strengths and limitations of this study

Compared with the neuropsychological tests alone as efficacy evaluations, the combination with in-vivo measures of brain alterations in this study will be more sensitive in detecting acupuncture efficacy.

This study will firstly uncover the efficacy and neural mechanism of acupuncture treatment in older adults with SCD.

A multi-domain neuropsychological test battery will be employed, which can assess multiple cognitive domains including executive function, attention, visuospatial function, and language.

Sham needles and adhesive pads will be used for better patient blinding.

A potential limitation is that not a large sample size will be performed in this study.

### INTRODUCTION

Dementia is the greatest global challenge for health and social care in the 21st century [1]. Globally, about 47 million people were living with dementia in 2015, and this number is projected to triple by 2050, based on the World Alzheimer Report (2015). Alzheimer's disease (AD) is the most common form of dementia [2]. Currently, there is no effective cure for AD, and the available treatments have only moderately alleviate symptoms [3]. Therefore, prevention is essential to reduce the dementia epidemic [4 5]. The long "preclinical" phase of AD provides an opportunity for individuals to participate in treatment trials to delay or prevent cognitive decline [6-8].

Subjective cognitive decline (SCD) usually occurs in older adults, and it refers to the self-perception of cognitive decline, when individuals perform cognitive tests within normal limits and have preserved activities of daily living [9]. A review demonstrated that the prevalence of these complaints in persons aged 65 years or more varied from 25% to 50% [10]. Actually, many older adults claim cognitive decline might be regarded as hypochondriacs by professional healthy carers. However, several lines of evidence from longitudinal aging studies suggests that older adults with SCD are more likely to present AD biomarkers than their healthy peers. About 60% SCD individuals will decline to mild cognitive impairment (MCI) and AD over a 15-year

1  
2  
3 period [11 12]. People with SCD have more brain abnormalities such as hippocampal volume  
4 loss and hypometabolism compared with healthy controls [13]. Moreover, cerebrospinal amyloid  
5  $\beta$  is strongly predictive of subsequent clinical progression in patients with SCD [14]. This  
6 suggests that, for some older adults, SCD may represent a preclinical phase of AD.  
7  
8  
9

10  
11 There is still much plasticity in SCD. The patients in this stage may not progress to dementia  
12 or even revert to no cognitive impairment after effective treatment. Development of safe and  
13 effective interventions in early AD stages is important. Specific criteria to define SCD have been  
14 published [9 15], but clinical trials in SCD are in their infancy, and no pharmacological treatment  
15 or interventions is currently recommended for individuals with SCD. Despite these difficulties,  
16 the development of new treatments should be encouraged [16].  
17  
18  
19  
20  
21

22 The accumulated evidence suggests that non-pharmacologic intervention may benefit  
23 cognitive function in older adults with SCD [17]. Acupuncture, as a non-pharmacologic  
24 intervention, that has been widely used for patients with cognitive disorders. The WHO reports  
25 that acupuncture treatment can be beneficial for vascular dementia. A number of clinical studies  
26 have provided evidence that acupuncture is beneficial for the treatment of dementia or MCI [18].  
27 A systematic review supports the use of acupuncture for MCI [19]. Animal studies showed that  
28 acupuncture elicits its effects by mediation of neural plasticity in pathological conditions [20].  
29 However, the efficacy of acupuncture in patients with SCD has not be investigated. An  
30 experimental study is needed to test this hypothesis.  
31  
32  
33  
34  
35  
36  
37

38 By definition, individuals with SCD are within the normal range on clinical-  
39 neuropsychological tests. It will be difficult to detect response in this population compared with  
40 people who already have clinically manifest impairment (e.g., MCI) due to a ceiling effect. As  
41 such, neuropsychological tests in conjunction with in-vivo measures of brain function such as  
42 electroencephalo-graphy, or functional magnetic resonance imaging (fMRI), may be a more  
43 sensitive alternative to neuropsychological tests [21-23]. Brain alterations are subtle but  
44 measurable to identify individuals at risk for AD well before cognitive symptoms are manifested  
45 by using fMRI, allowing researchers to use neuroimaging to ascertain response after intervention  
46 sensitivity [24]. For better ascertaining the clinical response and unveiling the mechanism, brain  
47 alterations measured by fMRI could also be used to evaluate the efficacy of acupuncture.  
48  
49  
50  
51  
52  
53  
54  
55  
56  
57  
58  
59  
60

## OBJECTIVES

This study is a randomized controlled functional brain imaging trial with 12 weeks of treatment, aiming at: (1) evaluating the effects of acupuncture treatment on cognitive function in older adults with SCD; (2) exploring the central mechanism of the long-lasting effect of acupuncture on SCD; and (3) investigating the safety of acupuncture treatment on SCD.

## METHODS

### Design

General ethical approval was obtained from the ethics committee of the Beijing Hospital of Traditional Chinese Medicine affiliated to Capital Medical University (Ref: 2017BL-061-03). The study was registered under [clinicaltrials.gov](http://clinicaltrials.gov) (NCT03444896). The CONSORT statement for non-pharmacological interventions has been used as a framework for development of the methodology for this project [25 26].

This trial is a 1:1 randomized single-blinded, and placebo-controlled study with two parallel groups involving elderly adults. The study is designed to examine the effect and neural mechanism of acupuncture treatment on cognitive function before and after a 12 weeks intervention period. As shown in Figure 1, the cognitive assessments and MRI scans will be performed at baseline and immediately after the completion of the intervention.

### Participants

The study will mainly take place in Dongcheng, Fengtai, and Shunyi District in Beijing. People with SCD will be recruited from community-dwelling population in those Districts. In order to have better insight into the trial for community residents, science popularization lectures about dementia and advertisement of the trial will be given in community service centers. The brochures and posters will also be distributed. Besides, advertisement of the trial will be shared in the official account on WeChat (China's most popular social media platform) of the Beijing Hospital of Traditional Chinese Medicine affiliated to Capital Medical University and health web site ([www.39.net](http://www.39.net)) or local newspaper for recruiting participants. Interested individuals will be screened in the clinic, community service centers or by phone using the inclusion/exclusion criteria. All those who meet the inclusion criteria will receive a study information sheet including

1  
2  
3 the design, procedure, benefits, and risks of the study. Before the study procedure started, the  
4 subjects will have to provide signed written informed consent forms. The diagnosis of SCD will  
5 be based on the published SCD research criteria proposed by the Subjective Cognitive Decline  
6 Initiative (SCD-I) [9].  
7  
8  
9

### 10 **Inclusion criteria**

- 13 •Male and female adults aged 55-75;
- 14 •Native Chinese speakers who are right-handed and have at least a primary school  
15 education;
- 16 •Self-reported persistent memory decline compared with a previous normal status within  
17 the last 5 years, which is confirmed by caregivers;
- 18 •Normal age- and education-adjusted performance on neuropsychological test including  
19 the Chinese version of Mini-Mental State Examination (MMSE) [27], the auditory  
20 verbal learning test (the short-term delayed free recall, the long-term delayed free  
21 recall, and the recognition test) [28], Trail Making Test [29], and Animal Fluency Test  
22 [30].
- 23 •No or minimal impairment in activities of daily living;

### 32 **Exclusion criteria**

- 33 •Presence of a positive neurologic history (e.g., traumatic brain injury, stroke, Parkinson's  
34 disease, multiple sclerosis);
- 35 •Treatments which would affect cognitive function (e.g., treatment for an acute psychiatric  
36 episode, therapy with memantine, rivastigmine and donepezil, traditional Chinese  
37 medicines which improve cognitive function such as Bushen capsule);
- 38 •Presence of significant psychiatric history (e.g., bipolar disorder, schizophrenia) and/or  
39 severe anxiety and depression;
- 40 •Presence of serious heart, kidney, liver, gastrointestinal, infectious, endocrine disease or  
41 cancer;
- 42 •History of alcohol or drug abuse/addiction;
- 43 •Any contraindications for MRI scans (e.g., aneurysm clip pacemaker);

- Significant visual and/or auditory impairment uncorrected by aids, and unable to perform neuropsychological evaluations;
- Currently enrolled in another research study;
- Received acupuncture treatment in the preceding month;

During the trial period, patients with SCD who meet the following criteria will be excluded from the study:

- taking medication or receiving additional treatment that is expected to affect the cognitive function (e.g., tranquilizers, antianxiolytics, hypnotics, nootropics, and cholinomimetic agents);
- withdrawal of consent for study participation because the patients does not wish to continue;
- missing more than 5 of 24 acupuncture treatment sessions;
- occurrence of a serious adverse event that the doctors consider should termination;
- critical protocol violation such as violation of eligibility criteria.

## Intervention

Patients will receive 24 acupuncture treatment sessions over 12 weeks (twice a week). Hwato brand single-use acupuncture needles (size  $0.35 \times 25$  mm or  $0.35 \times 40$  mm), pragmatic placebo needles (size  $0.30 \times 25$  mm), and SDZ-V electroacupuncture apparatuses will be used.

For the acupuncture group (Figure 2), acupuncture needles will be placed at acupoints Baihui (DU20), Shengting (DU24), Fengfu (DU16), Fengchi(GB20), Danzhong (RN17), Zhongwan (RN12), Qihai (RN6), Neiguan (PC6), Tongli (HT5), Xuehai (SP10), Zusanli (ST36), Zhaohai (KI6), Xinshu (BL15), and Yixi (BL45). After skin disinfection in patient in the supine position, the adhesive pads are pasted on the acupoints surface except for Baihui (DU20) and Shengting (DU24). Then, the acupuncture needles will be inserted through the adhesive pads into the skin depending on the location of the needle. The location is show in Table 1. Manual acupuncture by acupuncturists using a small, equal manipulations of twirling, lifting, and thrusting will performed on all needles to reach deqi. The patients will feel the deqi sensation, such as soreness, numbness, distention, heaviness, and other sensations. Paired electrodes from the electroacupuncture apparatus will be attached to the needle holders of the DU20 and DU24. A dilatational wave of 2-100 Hz and a current intensity of 1 to 5 mA will be performed following

by the degree of needle handle shivering, ignoring the patient's feelings. The needles will be extracted after 20 minutes for each treatment. The acupoints of DU16, BL15 and BL45 will achieve deqi in patients in a sitting position without retaining the needle.

**Table 1.** Location of Acupoints Used in the Acupuncture Group

| Acupoints        | Location                                                                                                                                                                                       | Depth       |
|------------------|------------------------------------------------------------------------------------------------------------------------------------------------------------------------------------------------|-------------|
| Baihui (DU20)    | 5 cun directly above the midpoint of the posterior hairline, or at the midpoint of the line connecting the apexes of the two auricles.                                                         | 0.2 cun     |
| Shengting (DU24) | 1.0 cun directly above the midpoint of posterior hairline.                                                                                                                                     | 0.2 cun     |
| Fengfu (DU16)    | On the back of neck, 1 cun directly above the midpoint of the posterior hairline, directly below the external occipital protuberance.                                                          | 0.5~0.1 cun |
| Fengchi(GB20)    | On the nape, below the occiput, at the level of Fengfu, in the depression between the upper portion of sternocleidomastoideus and trapezius muscle.                                            | 0.5~0.8 cun |
| Danzhong (RN17)  | On the anterior median line of the chest, at the level of the fourth intercostal space, at the midpoint between the two nipples.                                                               | 0.5 cun     |
| Zhongwan (RN12)  | On the the anterior median line of the upper abdomen, 4 cun above the umbilicus.                                                                                                               | 1~1.5 cun   |
| Qihai (RN6)      | On the anterior median line of the lower abdomen, 1.5 cun below the umbilicus.                                                                                                                 | 1~1.5 cun   |
| Neiguan (PC6)    | On the palmar aspect of forearm, 2.0 cun above the transverse crease of the wrist, between the tendons of palmaris longus and flexor carpi radialis muscle.                                    | 0.5~0.1 cun |
| Tongli (HT5),    | On the radial aspect of the tendon of the ulnar flexor muscle of the wrist, and 1 cun above the carpal crease.                                                                                 | 0.3~0.5 cun |
| Xuehai (SP10)    | When the knee is flexed, on the medial aspect of the thigh, the point is 2 cun above the mediosuperior border of the patella, on the bulgs of the medial portion of muscle quadriceps femoris. | 0.8~1 cun   |
| Zusanli (ST36)   | 3 cun directly below Dubi* and one finger-breadth lateral to the anterior border of the tibia.                                                                                                 | 0.8~1 cun   |
| Zhaohai (KI6)    | On the depression below the tip of the medial malleolus.                                                                                                                                       | 0.5~0.8 cun |
| Xinshu (BL15)    | 1.5 cun from the lower border of the spinous process of the fifth thoracic vertebra.                                                                                                           | 0.3~0.5 cun |
| Yixi (BL45)      | 3 cun from the lower border of the spinous process of the sixth thoracic vertebra.                                                                                                             | 0.5~0.8 cun |

Dubi\* location = When the knee is flexed, the point is at the knee, below the patella, in the depression from the patella ligament.

For the sham acupuncture group, sham acupoints at locations away from known acupuncture points will be used to minimize physiological effects, and the location of sham acupoints are showed in Table 2. Patients will receive noninsertive acupuncture using the pragmatic placebo needles (Hwato brand, size 0.35 × 25 mm; supplement figure 1). As same as in the acupuncture group, the adhesive pads are initially pasted on the sham acupoints surface except for sham acupoint 1. The pragmatic placebo needles with a blunt tip will be placed on the adhesive pads.

In order to minimize the physiological effect, acupuncturists will be instructed to lightly place the sham needles with a blunt tip on the adhesive pads with no manipulation. The acupuncture needle will be inserted to a shallow depth at the sham acupoint 1, which does not penetrate below the skin, and needle manipulation for *deqi*. Sham acupoint 11 and Sham acupoint 12 will be inserted with sham needles without retaining the needle. Paired electrodes will be attached the needle holders of the bilateral sham acupoint 2 but with no electricity output.

**Table 2.** Location of sham acupoints used in the sham acupuncture group.

| Sham Acupoints   | Location                                                                                      |
|------------------|-----------------------------------------------------------------------------------------------|
| Sham acupoint 1  | Midpoint of Shuaigu (GB8) and Touwei (ST8)                                                    |
| Sham acupoint 2  | Midpoint of Touwei (ST8) and Yangbai(GB14)                                                    |
| Sham acupoint 3  | Midpoint between Tianyou (SJ16) and Tianrong(SI17)                                            |
| Sham acupoint 4  | 4 cun above the umbilicus and 1 cun right of the umbilical midline                            |
| Sham acupoint 5  | 2 cun below the umbilicus and 1 cun right of the umbilical midline                            |
| Sham acupoint 6  | 1 cun outside the point 1/4 of the line between Shenmen (HT7) and Shaohai (HT3)               |
| Sham acupoint 7  | 1 cun outside the midpoint of Shenmen (HT7) and Shaohai (HT3)                                 |
| Sham acupoint 8  | 6 cun above mediosuperior border of the patella                                               |
| Sham acupoint 9  | 3 cun below the Yanglingquan (GB34) and in the middle of the gallbladder and bladder channels |
| Sham acupoint 10 | Midpoint between Jiexi (ST 41) and Qiuxu (GB40)                                               |
| Sham acupoint 11 | 2 cun from the lower border of the spinous process of the fifth thoracic vertebra             |
| Sham acupoint 12 | 2 cun from the lower border of the spinous process of the sixth thoracic vertebra             |

## MRI protocol

Patients will undergo brain MRI at baseline and after treatments. The MRI scan will be performed with a 3.0 Tesla superconductor (Skyra, Siemens, Erlangen, Germany) in the Beijing Hospital of Traditional Chinese Medicine Affiliated to Capital Medical University. The parameters of sequences employed in this study are provided by China Association of Brain Imaging ([www.abimaging.org](http://www.abimaging.org)). Sagittal structural images will be acquired using a magnetization



1  
2  
3 prepared rapid gradient echo (MP-RAGE) three-dimensional T1-weighted sequence with the  
4 following parameters: TR/TE = 2,530/2.98 ms, flip angle = 7°, inversion time = 1100 ms, matrix  
5 = 256 × 256, 1 mm slice thickness without slice gap. T2\*-weighted functional images will be  
6 collected using a gradient-echo echo-planar imaging sequence with the following parameters:  
7 repetition time = 3200 ms, echo time = 407 ms, flip angle = 120°.  
8  
9

10  
11  
12 Resting state-fMRI and task fMRI will be performed using an echo planar imaging (EPI)  
13 sequence with the following parameters: TR/TE = 2,000/30 ms, flip angle = 90°, matrix = 64 ×  
14 64, slice thickness = 3.5 mm with 1 mm slice gap. Diffusion tensor imaging (DTI) will use a  
15 double spin-echo echo-planar imaging sequence (TR/TE = 12,000/77 ms, flip angle = 90°,  
16 Volume interval = 12, 2 mm thick axial slices). ASL imaging of the whole brain is performed by  
17 use of a 3D pseudocontinuous ASL sequence (TR/TE = 5,000/ 15.92 ms, flip angle = 180°, Slice  
18 thickness = 3.5 mm; labeling duration, number of slices = 40).  
19  
20  
21  
22  
23  
24

25 All scans will be reviewed qualitatively by two radiologists to screen for possible brain  
26 lesions or structural abnormalities. DTI images will be analyzed using the PANDA package  
27 [31]. Functional MRI data collected during the memory task and at rest. ASL data will be  
28 performed with the Resting-State fMRI (DPARF) toolbox and SPM8  
29 (<http://www.fil.ion.ucl.ac.uk/spm/software/spm8>) for MATLAB. Brain activation, connectivity  
30 changes, and cerebral blood flow will be compared between two groups before and after  
31 treatment.  
32  
33  
34  
35  
36  
37

## 38 **Outcome measures**

### 39 *Clinical outcome assessments*

40  
41  
42 Global cognitive function based on a composite score will be used to evaluate the clinical  
43 efficacy of acupuncture treatment at baseline, and at the end of the 12 week treatment period. It  
44 will be computed by averaging z-scores from a multi-domain neuropsychological test battery that  
45 includes 8 tests [32]. Animal Fluency Test (AFT) that assess the language and executive function  
46 by examining categorical verbal fluency [30]. Trail Making Test (TMT) part A and B examines  
47 graphomotor speed, attention, and executive function [33]. Digit Symbol Substitution Test  
48 (DSST) is used to assess processing speed, attention and concentration [34]. Clock Drawing Test  
49 (CDT) can assess multiple cognitive functions, including verbal understanding, memory, abstract  
50  
51  
52  
53  
54  
55  
56  
57  
58  
59  
60

1  
2  
3 thinking, and executive functions [35]. Digit-Span Test (DST) is used to measure working  
4 memory's number storage capacity. Stroop color word test (SCWT) is a classic instrument for the  
5 assessment of selective attention, cognitive flexibility, cognitive inhibition, and information  
6 processing speed [36]. Auditory Verbal Learning Test (AVLT) a powerful neuropsychological  
7 test to assess episodic memory [37 38].  
8  
9

10  
11  
12 All patients will fill out a subjective cognitive decline questionnaire (SCDQ) [39] to assess  
13 their degree of subjective cognitive decline. The Face recognition questionnaire and Santa  
14 Barbara Sense of Direction scale [40] will be used to measure the ability for facial recognition  
15 and direction. Depressive symptoms, and sleep quality will be measured by Geriatric Depression  
16 Scale and Pittsburgh Sleep Quality Index (PSQI) [41].  
17  
18  
19  
20

### 21 *Neuroplasticity assessments*

22  
23  
24 In this study, neuroplasticity changes between the two groups will be measured by fMRI.  
25 Before the acupuncture treatment, patients will completed the fMRI scan within 3 days. They  
26 will also have the follow up fMRI scan within 3 days after the completion of their intervention  
27 (Figure 3). Brain activity and functional connectivity will be assessed under a resting state and a  
28 memory task. Group difference on cerebral blood flow and white matter integrity will be  
29 assessed by means of arterial spin labeling (ASL) or diffusion tensor imaging (DTI).  
30  
31  
32  
33  
34

35 *Memory task.* The patients will be trained before entering the fMRI scanner. They will  
36 complete a practice version of the memory task paradigm in computer. This practice mock test  
37 will show the correct number, and they need to perform the tasks over an accuracy criterion of  
38 80% to ensure that the patients understand how to complete the memory task in the scanner. A  
39 blocked periodic design that incorporated alternating 1-back, and 2-back tasks will be used.  
40 Patients will view facial pictures, scene pictures or single digits (0–9, black on a white  
41 background). In the 1-back task, the patients are required to press a button when a facial picture,  
42 scene picture or digit appears that is the same as the one before. In the 2-back task, the patients  
43 are asked to press a response button if the current facial picture, scene picture or digit is the same  
44 as the one which was presented two trials before. The stimuli consist of 17 blocks for 236  
45 seconds and are presented on a computer using MATLAB 8.6 (Mathworks, Inc., Natick, MA,  
46 USA) for 1 second, with an inter-stimulus interval of 1 second. Trial types within blocks are  
47 presented in pseudorandomized order.  
48  
49  
50  
51  
52  
53  
54  
55  
56  
57  
58  
59  
60

1  
2  
3 Once in the scanner, anatomical and functional scans will be performed. During the scanning,  
4 all patients are asked to lie quietly in the scanner with their eyes open, trying to avoid thinking  
5 systematically, and moving as little as possible. In resting state fMRI scanning, the patients are  
6 instructed to view centrally placed fixation cross (+), and try to not think of anything. Two  
7 memory task runs will be conducted after T1 and resting state scans, then following by ASL, and  
8 DTI scans.  
9  
10  
11  
12  
13

### 14 **Apolipoprotein E genotyping**

15  
16 A TIANamp Blood DNA Kit (TIANGEN BIOTECH, Beijing, China) will be used to isolate  
17 High-molecular-weight DNA. The genotype of APOE will be detected by APOE Gene Detection  
18 Kit (Wuhan YZY Biopharma, Wuhan, China) with E2 and E4 reaction liquid. Genomic DNA  
19 and reaction liquid will be placed on a 7500 HT Fast Real-Time PCR (Applied Biosystems, Foster  
20 City, USA) with the following conditions: Uracil-N-Glycosylase treatment at 37 °C for 10  
21 minutes, denaturation at 95 °C for 5 minutes, followed by 40 cycles at 95 °C for 15s and  
22 annealing at 60 °C for 60s (acquiring the fluorescence signal in this step). According to the  
23 amplification plot, the genotype of APOE will be determined.  
24  
25  
26  
27  
28  
29  
30

### 31 **Safety and Monitoring**

32  
33 Treatment-related adverse events, including hematoma, bleeding, subcutaneous hemorrhage,  
34 serious pain, local infection and fatigue will be compared among patients in the acupuncture  
35 group and the sham acupuncture group, and will be documented at each treatment session. In  
36 order to ensure consistency, the neuropsychological tests and other assessment scales will be  
37 performed by the same researcher at baseline and the end of treatment. A professional staff will  
38 check the imaging data for quality and protocol conformity after each scanning session. Patients  
39 will undergo blood routine test and blood biochemical tests including blood glucose,  
40 homocysteine, total cholesterol, etc. before randomization and at the end of treatment.  
41  
42  
43  
44  
45  
46  
47

### 48 **Sample size and blinding**

49  
50 Task fMRI studies characteristically include small sample size [42] and thus have a low  
51 statistical power. The statistically underpowered study by definition means that a study will have  
52 less of a chance for detecting significant effects [43]. Therefore, power-based sample size will be  
53  
54  
55  
56  
57  
58  
59  
60

1  
2  
3 calculated prior to fMRI data collection [44]. Fortunately, approaches for sample size  
4 calculations in studies using functional magnetic resonance imaging have been developed.  
5  
6

7 By using the non-central random field theory, Hayasaka et al estimated that at least 12  
8 subjects would be required to detect signals in either of the auditory cortices with at least 80%  
9 power [45]. They also found that approximately 13 subjects would be required to detect signals  
10 in the auditory cortices with 80% power, when generated a sample size map based on the mock  
11 pilot analysis. Adopting a simulation-based method to calculate statistical power for group-level  
12 fMRI studies, Desmond and Glover found a minimum of 12 subjects are required to achieve 80%  
13 power at a  $\alpha = 0.05$  at the single voxel level [46]. For a more realistic thresholds, twice as many  
14 subjects are recommended to maintain this level of power after correcting for multiple  
15 comparisons. For a stricter alpha of 0.000002, approximately 25 subjects are needed. Mumford  
16 and Nichol recommended 20 subjects and a Type I error of  $\alpha = 0.005$  should probably be used,  
17 and this power calculation is based on a non-central T or F distribution [47]. We used the largest  
18 sample size of 25 for each group with an estimated dropout rate and loss of data due to head  
19 motion, then we planned to enroll 60 participants in the two groups.  
20  
21  
22  
23  
24  
25  
26  
27  
28  
29

30 Eligible patients will randomly assigned into either the acupuncture or sham acupuncture  
31 group after signed written informed consent forms via a randomization digital table with a 1:1  
32 ratio. Blocked randomization with a block size of 6 will be employed to ensure balance within  
33 the two groups. The randomization sequence will generated by a third-party professional  
34 statistician using computer-generated randomization the digital table by using SAS 9.2 (SAS  
35 Institute Inc., Cary, NC, USA). The randomization list will be stored by a noninvolved  
36 investigator and out of reach and sight of the involved investigators. The allocation schedule  
37 using a telephone randomization procedure. The randomization list was restricted to this research  
38 coordinator and was concealed from other study personnel. The patients, outcome assessors, and  
39 statisticians will be blinded to treatment allocation. Patients are told that they will receive one of  
40 two effective interventions randomized after enrolment. During the acupuncture treatment, the  
41 adhesive pads are pasted on the acupoints or sham acupoints after skin disinfection. The true or  
42 sham needles with a blunt tip will place in the adhesive pads. Patients in different groups will be  
43 separated into cubicles to refrain from communication.  
44  
45  
46  
47  
48  
49  
50  
51  
52  
53

#### 54 55 **Data collection and management** 56 57 58 59 60

1  
2  
3 At baseline, information of patients about age, sex, education, dominant hand, and medical  
4 history will be collected (Figure 4). For all patients that met the inclusion criteria, the  
5 neuropsychological tests will be performed before and after treatment in a quiet room by  
6 evaluators, who have been trained by the organization of Alliance of early AD. All of the MRI  
7 scans will be conducted in the same machine, and the operators have been technically trained by  
8 a professional engineer from the China Association of Brain Imaging. Blood samples will be  
9 collected in the morning and handled by 2 persons. After each treatment session, adverse event  
10 will be recorded in participant's diary card by acupuncturists.

11  
12 A case report form (CRF) will be used to collect the clinical data for each patient, labeled by  
13 unique numeric identifier and recorded by a trained graduate student. The data in the CRF will  
14 be verified for accuracy, missing data, and data consistency by a clinical research associate.  
15 Paper-based research data will be entered into an EpiData electronic database. For reducing  
16 errors in data entry, data will be entered independently twice by two independent people, and  
17 value pairs will then be compared for discordances, followed by resolution of discordances by  
18 referral to the original data source. The EpiData will export data in a Microsoft Excel  
19 spreadsheet formats. The data will be entered in an electronic Statistical Package SPSS software  
20 (SPSS 12.0 KO for Windows ©) for ease of statistical analysis.

## 21 22 23 24 25 26 27 28 29 30 31 32 33 34 **Statistical analysis**

### 35 36 *Clinical data analysis*

37  
38 In this study, intent-to-treat analysis and per protocol analysis will be used. In this study, the  
39 intent-to-treat population consisted of all randomized patients who received at least one dose of  
40 treatment and had a complete baseline assessment. The per protocol population defined as all  
41 randomized patients who did not discontinue prematurely, completed the 12 weeks treatment and  
42 had MRI scans before and after treatment. Observation of histograms and normal probability  
43 plots and a Shapiro–Wilk test will be performed to determine the data whether followed a normal  
44 distribution. Distributed data will be described using means, standard deviations, and 95%  
45 confidence intervals (CIs). Clinical outcome analyses will be done with SPSS software (SPSS  
46 22.0 KO for Windows ©), with a significance level of 0.05, and all hypothesis tests are two-  
47 tailed.  
48  
49  
50  
51  
52  
53  
54  
55  
56  
57  
58  
59  
60

1  
2  
3 Baseline demographic characteristics between the two groups will be analyzed with  $\chi^2$  test or  
4 Fisher's exact test for categorical measures, and with the T-test or Wilcoxon rank-sum test for  
5 continuous measures. The clinical outcome of the global cognitive function based on composite  
6 scores will be compared between the acupuncture group and sham acupuncture group. The  
7 composite scores will be created by converting all individual cognitive scores to standardized z  
8 scores. As previously described [32], we computed z-scores by subtracting the baseline group  
9 mean and dividing the baseline group standard deviation, and then averaging the standardized z  
10 scores across all tests. The general linear model will be used to examine change in cognitive  
11 scores. For the other outcomes, if it agreed with normal distribution, an independent T-test will  
12 used. Otherwise, for abnormal distribution, the data will analyzed with Wilcoxon's test. The  
13 statisticians who analyzed the data are blinded to the test settings.  
14  
15  
16  
17  
18  
19  
20  
21  
22

### 23 ***MRI data analysis***

24  
25 For imaging data will be analyzed using DPABI toolkit performing on MATLAB 8.6  
26 (Mathworks,Inc., Natick, MA, USA) to detect any changes in brain function due to acupuncture  
27 treatment. After data preprocessing, some graph theory-based or data driven approaches will be  
28 performed to investigate neuroplasticity between the two groups, such as regional homogeneity,  
29 amplitude of the low-frequency fluctuation, and voxel-wise degree centrality. A two-sample t-  
30 test will be conducted to investigate the differences in brain regions between the acupuncture  
31 group and the sham acupuncture group in the DPARSF software. Multiple comparisons will be  
32 used in order to better control for a highly inflated false positivity rate. Pearson's correlation  
33 analysis will be performed to examine the association between the fMRI image data and clinical  
34 variables.  
35  
36  
37  
38  
39  
40  
41  
42

### 43 **Ethics and dissemination**

44  
45 General ethical approval has been obtained from the ethics committee of the Beijing Hospital  
46 of Traditional Chinese Medicine affiliated to Capital Medical University on 29 January, 2018  
47 (Ref: 2017BL-061-02). The study was registered under clinicaltrials.gov (NCT03444896). The  
48 CONSORT statement and the CONSORT statement for non-pharmacological interventions have  
49 been used as a framework for development of the methodology for this project [24 25].  
50  
51  
52  
53  
54  
55  
56  
57  
58  
59  
60



1  
2  
3 If any modifications or decision are made, amendments will be reviewed and approved by the  
4 ethics committee, and new protocols would be uploaded to Clinicaltrials.gov. The results of the  
5 study will be published in a peer-reviewed academic journal and will also be disseminated  
6 electronically through conference presentations.  
7  
8  
9

### 10 **Patient and public involvement**

11  
12  
13 Currently, this trial is at the recruitment phase with no patient involved in. The participants  
14 will be able to view the study results via social media.  
15  
16

### 17 **DISCUSSION**

18  
19  
20 SCD, may be the initial phase of AD, and could serve as a window of opportunity for  
21 interventions at an early disease stage [23]. This study is planned as a randomized, assessor-  
22 blinded, placebo-controlled trial to evaluate the efficacy and central mechanism of acupuncture  
23 treatment on SCD compared with a sham acupuncture group. To our knowledge, this trial is also  
24 the first study to investigate the effect of acupuncture in SCD patients.  
25  
26  
27

28  
29 This study has several strengths. First, we will assess patients with SCD on multiple levels,  
30 including multi-domain neuropsychological tests, functional brain alterations, cerebrovascular  
31 risk factors, and APOE genotyping. This multi-domain assessment will be used to identify  
32 possible biomarkers involved in the effects of acupuncture in SCD.  
33  
34  
35

36  
37 Second, the neuropsychological assessment in the present study is a multi-domain  
38 neuropsychological test battery that included eight tests, which can assess multiple cognitive  
39 domains including executive functions, attention, visuospatial functioning, and language.  
40 Memory decline associated with AD risk factors [48 49], and then most instruments were used  
41 previously to measure SCD focus on memory [50]. However, it might be too restrictive to limit  
42 the SCD assessment to memory, in particular for atypical forms of AD [9 51]. In this study,  
43 multi-domain cognitive function will be assessed.  
44  
45  
46  
47  
48

49  
50 Additionally, functional brain alterations will be used as outcome measures. Compared with  
51 the neuropsychological tests alone, the combination of in-vivo measures of brain alterations in  
52 this study will be more sensitive in detecting acupuncture efficacy. A smaller training effect and  
53 ceiling effect may be found when using MRI [52]. Furthermore, it can be used as a tool to  
54  
55  
56  
57  
58  
59  
60



1  
2  
3 understand the mechanism of the acupuncture's effects. Functional MRI can identify whether  
4 neural efficiency is improved or the brain connectome is reorganized to achieve cognitive  
5 enhancement [53].  
6  
7

8  
9 A potential limitation is that the patients in this study will be recruited from the community.  
10 Considering the research environment, individuals recruited from a memory clinic may have a  
11 higher probability of having preclinical AD. They had specific concerns sufficient to prompt a  
12 medical visit [15]. However, community based studies have shown some predictive value of  
13 SCD for cognitive decline and dementia [10 54]. Another potential limitation of our study is that  
14 it will not include a large sample size, and this may lead to the need for a future study. The main  
15 feature of our study is to systemically investigate and analyze the central mechanisms of  
16 acupuncture treatment in patients with SCD. The findings may provide deeper insight into the  
17 benefits and mechanisms of acupuncture for patients with SCD.  
18  
19  
20  
21  
22  
23  
24

## 25 **Trial status**

26  
27 This trial is currently in the recruitment phase.  
28  
29  
30  
31

## 32 **Figure Legends**

33  
34  
35 *Figure 1.* Flow chart.  
36

37  
38 *Figure 2.* Location of acupoints or sham acupoints in the trial. Abbreviation: SA Sham acupoint, DU20  
39 Baihui, DU24 Shengting, DU16 Fengfu, GB20 Fengchi, RN17 Danzhong, RN12 Zhongwan, RN6 Qihai,  
40 PC6 Neiguan, HT5 Tongli, SP10 Xuehai, ST36 Zusanli, KI6 Zhaohai , BL15 Xinshu, BL45 Yixi.  
41  
42

43  
44 *Figure 3.* Magnetic resonance imaging experimental paradigm and an Illustrative diagram of the  
45 memory task.  
46

47  
48 *Figure 4.* Standard Protocol Items: Recommendations for Interventional Trials (SPIRIT) and the  
49 schedule of the trial.  
50

51  
52 *Supplement figure 1.* (a) The adhesive pads and sham needles with a blunt tip; (b) The adhesive  
53 pad was pasted on the surface of skin; (c) The sham needle was placed on the adhesive pad.  
54  
55  
56  
57  
58  
59  
60

## Footnotes

**List of abbreviations** SCD: Subjective Cognitive Decline; AD: Alzheimer's disease; MCI: Mild Cognitive Impairment; APOE: apolipoprotein E; MRI: Magnetic Resonance Imaging; AFT: Animal Fluency Test; TMT: Trail Making Test; DSST: Digit Symbol Substitution Test; SCWT: Stroop Color Word Test; AVLT: Auditory Verbal Learning Test; SCDQ: Subjective Cognitive Decline Questionnaire; SBSDS: Santa Barbara Sense of Direction Scale; HAMD: Hamilton Rating Scale for Depression; HAMA: Hamilton Rating Scale for Anxiety; PSQI: Pittsburgh Sleep Quality Index.

**Ethics approval and consent to participate** Ethics approval The Research Ethical Committee of Beijing Hospital of Traditional Chinese Medicine Affiliated to Capital Medical University approved the trial. The methods were carried out in accordance with the Declaration of Helsinki. Informed written consent was obtained from each patient.

**Consent for publication** Not applicable.

**Availability of data and materials** Not applicable. This is a study protocol only and as such no unpublished data are available.

**Competing interests** The authors declare that they have no competing interests.

**Funding** This work was supported by the National Natural Science Foundation of China (Grant No. 81674055) and supported by the Fundamental Research Funds for the Central Universities (2017-JYB-JS-018). We declared the study was only supported by the governmental funding, and the study did not receive funding/assistance from a commercial organization.

**Authors' contributors** Conceived and designed the experiments: CZL and JWH. Performed the experiments: PZ, ZYW, SQH, CQY, GXS; JQL, YNZ. Analyzed the data: XW, JFT. Wrote the paper: CQY, XW and CZL. All authors approved the final manuscript.

**Provenance and peer review** Not commissioned; externally peer reviewed.

## References

1. Livingston G, Sommerlad A, Orgeta V, et al. Dementia prevention, intervention, and care. *Lancet* 2017;**390**(10113):2673-734
2. Delbeuck X, Van der Linden M, Collette F. Alzheimer's disease as a disconnection syndrome? *Neuropsychol Rev* 2003;**13**(2):79-92
3. Ong SS, Doraiswamy PM, Lad EM. Controversies and Future Directions of Ocular Biomarkers in Alzheimer Disease. *JAMA neurology* 2018
4. WHO. Dementia: a public health priority. Geneva: World Health Organization—Alzheimer's Disease International hwwimhpdrea.
5. G8 dementia summit declaration. <https://www.gov.uk/government/publications/g8-dementia-summit-agreements>.
6. Sperling RA, Aisen PS, Beckett LA, et al. Toward defining the preclinical stages of Alzheimer's disease: recommendations from the National Institute on Aging-Alzheimer's Association workgroups on diagnostic guidelines for Alzheimer's disease. *Alzheimer's & dementia : the journal of the Alzheimer's Association* 2011;**7**(3):280-92
7. Jack CR, Jr., Knopman DS, Jagust WJ, et al. Tracking pathophysiological processes in Alzheimer's disease: an updated hypothetical model of dynamic biomarkers. *Lancet Neurol* 2013;**12**(2):207-16
8. Villemagne VL, Burnham S, Bourgeat P, et al. Amyloid beta deposition, neurodegeneration, and cognitive decline in sporadic Alzheimer's disease: a prospective cohort study. *Lancet Neurol* 2013;**12**(4):357-67
9. Jessen F, Amariglio RE, van Boxtel M, et al. A conceptual framework for research on subjective cognitive decline in preclinical Alzheimer's disease. *Alzheimer's & dementia : the journal of the Alzheimer's Association* 2014;**10**(6):844-52
10. Jonker C, Geerlings MI, Schmand B. Are memory complaints predictive for dementia? A review of clinical and population-based studies. *Int J Geriatr Psychiatry* 2000;**15**(11):983-91
11. Reisberg B, Gauthier S. Current evidence for subjective cognitive impairment (SCI) as the pre-mild cognitive impairment (MCI) stage of subsequently manifest Alzheimer's disease. *Int Psychogeriatr* 2008;**20**(1):1-16
12. Stewart R. Subjective cognitive impairment. *Current opinion in psychiatry* 2012;**25**(6):445-50
13. Scheef L, Spottke A, Daerr M, et al. Glucose metabolism, gray matter structure, and memory decline in subjective memory impairment. *Neurology* 2012;**79**(13):1332-9
14. van Harten AC, Visser PJ, Pijnenburg YA, et al. Cerebrospinal fluid Abeta42 is the best predictor of clinical progression in patients with subjective complaints. *Alzheimer's & dementia : the journal of the Alzheimer's Association* 2013;**9**(5):481-7
15. Molinuevo JL, Rabin LA, Amariglio R, et al. Implementation of subjective cognitive decline criteria in research studies. *Alzheimer's & dementia : the journal of the Alzheimer's Association* 2017;**13**(3):296-311
16. Rabin LA, Smart CM, Amariglio RE. Subjective Cognitive Decline in Preclinical Alzheimer's Disease. *Annu Rev Clin Psychol* 2017;**13**:369-96
17. Smart CM, Karr JE, Areshenkoff CN, et al. Non-Pharmacologic Interventions for Older Adults with Subjective Cognitive Decline: Systematic Review, Meta-Analysis, and Preliminary Recommendations. *Neuropsychol Rev* 2017;**27**(3):245-57
18. Wang S, Yang H, Zhang J, et al. Efficacy and safety assessment of acupuncture and nimodipine to treat mild cognitive impairment after cerebral infarction: a randomized controlled trial. *BMC Complement Altern Med* 2016;**16**:361
19. Deng M, Wang XF. Acupuncture for amnesic mild cognitive impairment: a meta-analysis of randomised controlled trials. *Acupuncture in medicine : journal of the British Medical Acupuncture Society* 2016;**34**(5):342-48

20. Jiang DY, Lu HW. [Effect of electroacupuncture on the cognitive function and plasma antibodies against beta-amyloid protein in aged rats with ketamine anesthesia]. *Zhongguo Zhong Xi Yi Jie He Za Zhi* 2011;**31**(11):1502-5
21. Campanella S. Why it is time to develop the use of cognitive event-related potentials in the treatment of psychiatric diseases. *Neuropsychiatr Dis Treat* 2013;**9**:1835-45
22. de Waal H, Stam CJ, Lansbergen MM, et al. The effect of souvenaid on functional brain network organisation in patients with mild Alzheimer's disease: a randomised controlled study. *PLoS One* 2014;**9**(1):e86558
23. Smart CM, Segalowitz SJ, Mulligan BP, et al. Mindfulness Training for Older Adults with Subjective Cognitive Decline: Results from a Pilot Randomized Controlled Trial. *J Alzheimers Dis* 2016;**52**(2):757-74
24. Mathotaarachchi S, Pascoal TA, Shin M, et al. Identifying incipient dementia individuals using machine learning and amyloid imaging. *Neurobiol Aging* 2017;**59**:80-90
25. Boutron I, Moher D, Altman DG, et al. Extending the CONSORT statement to randomized trials of nonpharmacologic treatment: explanation and elaboration. *Annals of internal medicine* 2008;**148**(4):295-309
26. Schulz KF, Altman DG, Moher D, et al. CONSORT 2010 statement: updated guidelines for reporting parallel group randomised trials. *Int J Surg* 2011;**9**(8):672-7
27. Jia JN ZJ, Xu J, Wei W, Chen X. The recommendation of diagnosis and treatment of cognitive impairment in Chinese elderly. *Chin J Geriatr.* 2014;**33**(8):817–825.
28. Zhao Q, Lv Y, Zhou Y, et al. Short-term delayed recall of auditory verbal learning test is equivalent to long-term delayed recall for identifying amnesic mild cognitive impairment. *PLoS One* 2012;**7**(12):e51157
29. Zhao Q, Guo Q, Li F, et al. The Shape Trail Test: application of a new variant of the Trail making test. *PLoS One* 2013;**8**(2):e57333
30. Yang L, Koyanagi A, Smith L, et al. Hand grip strength and cognitive function among elderly cancer survivors. *PLoS One* 2018;**13**(6):e0197909
31. Cui Z, Zhong S, Xu P, et al. PANDA: a pipeline toolbox for analyzing brain diffusion images. *Front Hum Neurosci* 2013;**7**:42
32. Barnes DE, Santos-Modesitt W, Poelke G, et al. The Mental Activity and eXercise (MAX) trial: a randomized controlled trial to enhance cognitive function in older adults. *JAMA internal medicine* 2013;**173**(9):797-804
33. Bowie CR, Harvey PD. Administration and interpretation of the Trail Making Test. *Nat Protoc* 2006;**1**(5):2277-81
34. Chen SP, Bhattacharya J, Pershing S. Association of Vision Loss With Cognition in Older Adults. *JAMA ophthalmology* 2017;**135**(9):963-70
35. Terwindt PW, Hubers AA, Giltay EJ, et al. Screening for cognitive dysfunction in Huntington's disease with the clock drawing test. *Int J Geriatr Psychiatry* 2016;**31**(9):1013-20
36. Rivera D, Perrin PB, Stevens LF, et al. Stroop Color-Word Interference Test: Normative data for the Latin American Spanish speaking adult population. *NeuroRehabilitation* 2015;**37**(4):591-624
37. Moradi E, Hallikainen I, Hanninen T, et al. Rey's Auditory Verbal Learning Test scores can be predicted from whole brain MRI in Alzheimer's disease. *NeuroImage Clinical* 2017;**13**:415-27
38. Thomas ML, Green MF, Helleman G, et al. Modeling Deficits From Early Auditory Information Processing to Psychosocial Functioning in Schizophrenia. *JAMA psychiatry* 2017;**74**(1):37-46
39. Rami L, Mollica MA, Garcia-Sanchez C, et al. The Subjective Cognitive Decline Questionnaire (SCD-Q): a validation study. *J Alzheimers Dis* 2014;**41**(2):453-66
40. Boccia M, Vecchione F, Piccardi L, et al. Effect of Cognitive Style on Learning and Retrieval of Navigational Environments. *Front Pharmacol* 2017;**8**:496
41. Buysse DJ, Germain A, Moul DE, et al. Efficacy of brief behavioral treatment for chronic insomnia in older adults. *Archives of internal medicine* 2011;**171**(10):887-95

- 1
- 2
- 3
- 4 42. Lombardo MV, Auyeung B, Holt RJ, et al. Improving effect size estimation and statistical power with
- 5 multi-echo fMRI and its impact on understanding the neural systems supporting mentalizing.
- 6 *Neuroimage* 2016;**142**:55-66
- 7 43. Button KS, Ioannidis JP, Mokrysz C, et al. Power failure: why small sample size undermines the
- 8 reliability of neuroscience. *Nat Rev Neurosci* 2013;**14**(5):365-76
- 9 44. Guo Q, Thabane L, Hall G, et al. A systematic review of the reporting of sample size calculations and
- 10 corresponding data components in observational functional magnetic resonance imaging studies.
- 11 *Neuroimage* 2014;**86**:172-81
- 12 45. Hayasaka S, Peiffer AM, Hugenschmidt CE, et al. Power and sample size calculation for
- 13 neuroimaging studies by non-central random field theory. *Neuroimage* 2007;**37**(3):721-30
- 14 46. Desmond JE, Glover GH. Estimating sample size in functional MRI (fMRI) neuroimaging studies:
- 15 statistical power analyses. *J Neurosci Methods* 2002;**118**(2):115-28
- 16 47. Mumford JA, Nichols TE. Power calculation for group fMRI studies accounting for arbitrary design
- 17 and temporal autocorrelation. *Neuroimage* 2008;**39**(1):261-8
- 18 48. Mormino EC, Betensky RA, Hedden T, et al. Amyloid and APOE epsilon4 interact to influence short-
- 19 term decline in preclinical Alzheimer disease. *Neurology* 2014;**82**(20):1760-7
- 20 49. Doraiswamy PM, Sperling RA, Johnson K, et al. Florbetapir F 18 amyloid PET and 36-month
- 21 cognitive decline: a prospective multicenter study. *Mol Psychiatry* 2014;**19**(9):1044-51
- 22 50. Rabin LA, Smart CM, Crane PK, et al. Subjective Cognitive Decline in Older Adults: An Overview
- 23 of Self-Report Measures Used Across 19 International Research Studies. *J Alzheimers Dis*
- 24 2015;**48 Suppl 1**:S63-86
- 25 51. Scheltens NM, Galindo-Garre F, Pijnenburg YA, et al. The identification of cognitive subtypes in
- 26 Alzheimer's disease dementia using latent class analysis. *J Neurol Neurosurg Psychiatry*
- 27 2016;**87**(3):235-43
- 28 52. Simon SS, Yokomizo JE, Bottino CM. Cognitive intervention in amnesic Mild Cognitive Impairment:
- 29 a systematic review. *Neurosci Biobehav Rev* 2012;**36**(4):1163-78
- 30 53. Tang Y, Zhu Z, Liu Q, et al. The efficacy of Cognitive training in patients with VAsCular Cognitive
- 31 Impairment, No dEmentia (the Cog-VACCINE study): study protocol for a randomized
- 32 controlled trial. *Trials* 2016;**17**(1):392
- 33 54. Reisberg B, Prichep L, Mosconi L, et al. The pre-mild cognitive impairment, subjective cognitive
- 34 impairment stage of Alzheimer's disease. *Alzheimer's & dementia : the journal of the Alzheimer's*
- 35 *Association* 2008;**4**(1 Suppl 1):S98-S108
- 36
- 37
- 38
- 39
- 40
- 41
- 42
- 43
- 44
- 45
- 46
- 47
- 48
- 49
- 50
- 51
- 52
- 53
- 54
- 55
- 56
- 57
- 58
- 59
- 60

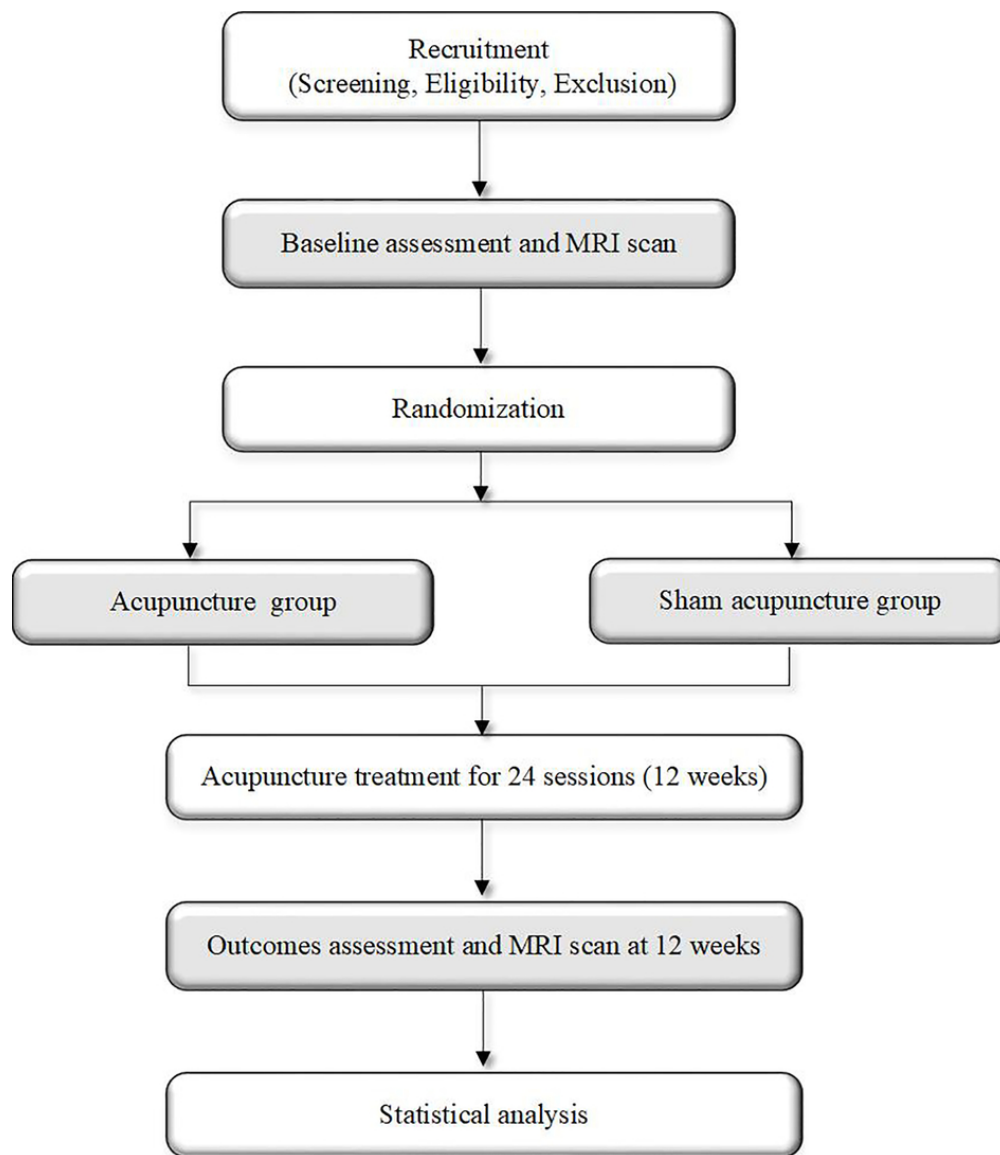

Flow chart.

80x93mm (300 x 300 DPI)



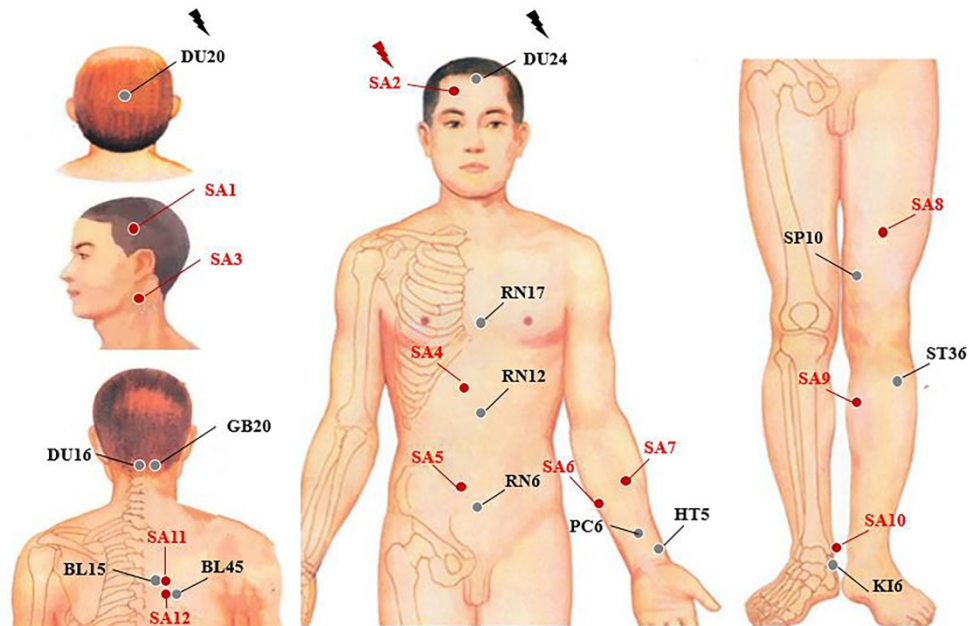

Location of acupoints or sham acupoints in the trial. Abbreviation: SA Sham acupoint, DU20 Baihui, DU24 Shengting, DU16 Fengfu, GB20 Fengchi, RN17 Danzhong, RN12 Zhongwan, RN6 Qihai, PC6 Neiguan, HT5 Tongli, SP10 Xuehai, ST36 Zusanli, KI6 Zhaohai, BL15 Xinshu, BL45 Yixi.

160x105mm (300 x 300 DPI)



**Pre-scan session**

**MRI scan session: total session time = 44.4 min**

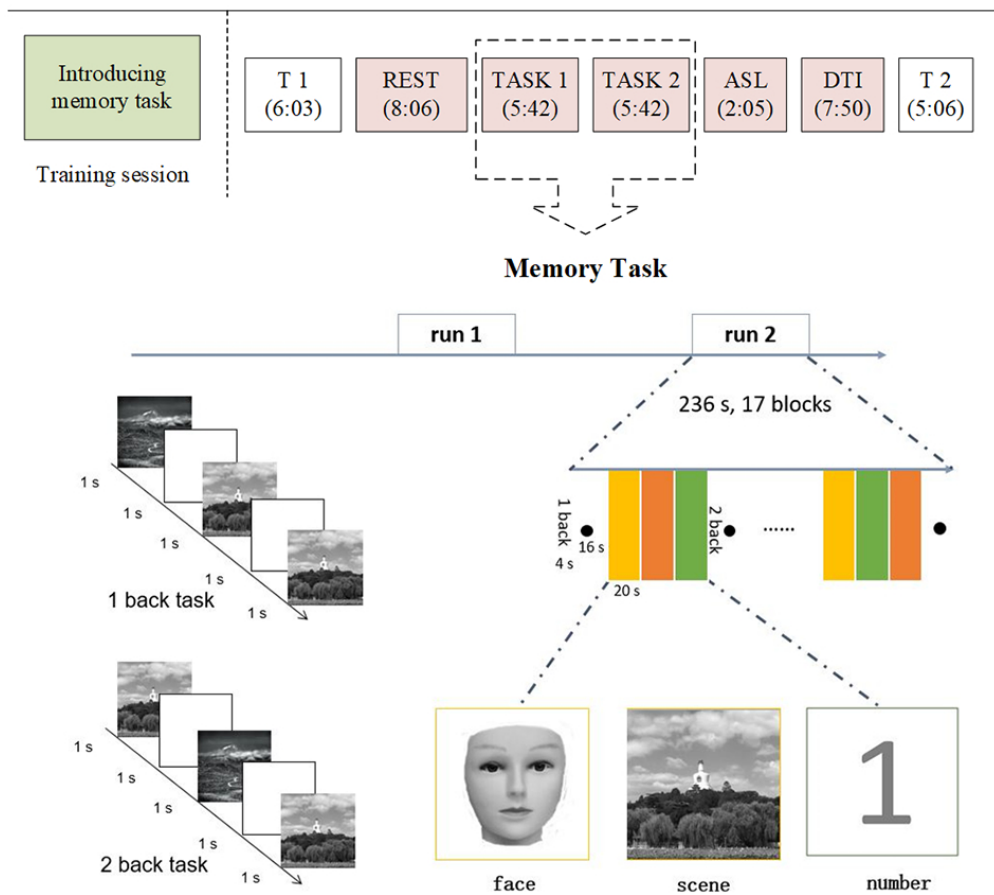

| Study period              |          |        |                 |                    |
|---------------------------|----------|--------|-----------------|--------------------|
| Items                     | Baseline |        | Treatment phase | Outcome assessment |
| Time point                | -1 week  | 0 week | 1- 12 weeks     | 13-14 weeks        |
| <b>Enrolment</b>          |          |        |                 |                    |
| Eligibility screen        | X        |        |                 |                    |
| Informed consent          | X        |        |                 |                    |
| Examination               |          | X      |                 |                    |
| Randomization             |          | X      |                 |                    |
| <b>Intervention</b>       |          |        |                 |                    |
| Acupuncture (n = 30)      |          |        | X               |                    |
| Sham acupuncture (n = 30) |          |        | X               |                    |
| <b>MRI scan</b>           |          |        |                 |                    |
| Acupuncture               |          | X      |                 | X                  |
| Sham acupuncture          |          | X      |                 | X                  |
| <b>Assessment</b>         |          |        |                 |                    |
| AFT                       |          | X      |                 | X                  |
| TMT                       |          | X      |                 | X                  |
| DSST                      |          | X      |                 | X                  |
| SCWT                      |          | X      |                 | X                  |
| AVLT                      |          | X      |                 | X                  |
| SCDQ                      |          | X      |                 | X                  |
| SBSDS                     |          | X      |                 | X                  |
| HAMD                      |          | X      |                 | X                  |
| HAMA                      |          | X      |                 | X                  |
| PSQI                      |          | X      |                 | X                  |
| <b>Safety</b>             |          |        |                 |                    |
| Laboratory test           |          | X      |                 | X                  |
| Adverse events            |          |        | X               | X                  |

Standard Protocol Items: Recommendations for Interventional Trials (SPIRIT) schedule of the trial.

80x73mm (300 x 300 DPI)

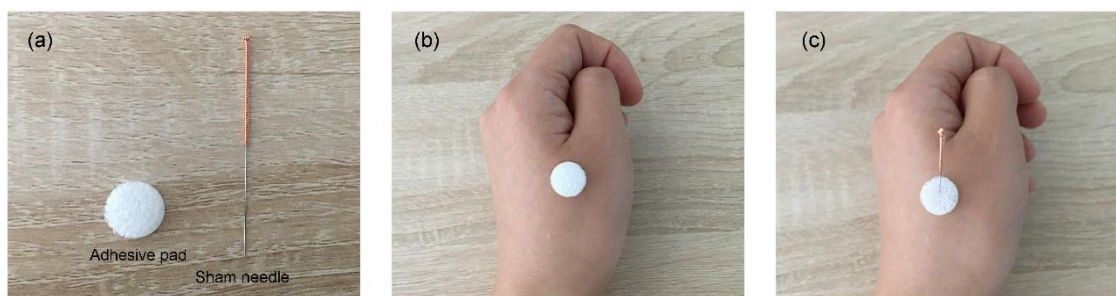

Supplement figure 1. Pictures of sham needle. (a) The adhesive pad and sham needle with a blunt tip; (b) The adhesive pad is pasted on the surface of skin; (c) The sham needle is placed on the adhesive pad.

1  
2  
3  
4  
5  
6  
7  
8  
9  
10  
11  
12  
13  
14  
15  
16  
17  
18  
19  
20  
21  
22  
23  
24  
25  
26  
27  
28  
29  
30  
31  
32  
33  
34  
35  
36  
37  
38  
39  
40  
41  
42  
43  
44  
45  
46

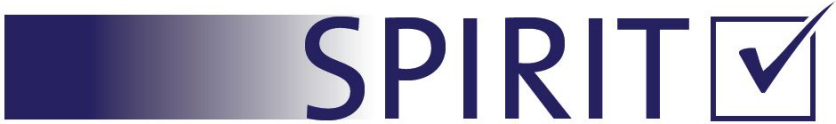

STANDARD PROTOCOL ITEMS: RECOMMENDATIONS FOR INTERVENTIONAL TRIALS

**SPIRIT 2013 Checklist: Recommended items to address in a clinical trial protocol and related documents\***

| Section/item                      | Item No | Description                                                                                                                                                                                                                                                                              | Page          |
|-----------------------------------|---------|------------------------------------------------------------------------------------------------------------------------------------------------------------------------------------------------------------------------------------------------------------------------------------------|---------------|
| <b>Administrative information</b> |         |                                                                                                                                                                                                                                                                                          |               |
| Title                             | 1       | Descriptive title identifying the study design, population, interventions, and, if applicable, trial acronym                                                                                                                                                                             | 5             |
| Trial registration                | 2a      | Trial identifier and registry name. If not yet registered, name of intended registry                                                                                                                                                                                                     | 5             |
|                                   | 2b      | All items from the World Health Organization Trial Registration Data Set                                                                                                                                                                                                                 | Not statement |
| Protocol version                  | 3       | Date and version identifier                                                                                                                                                                                                                                                              | 5             |
| Funding                           | 4       | Sources and types of financial, material, and other support                                                                                                                                                                                                                              | 16            |
| Roles and responsibilities        | 5a      | Names, affiliations, and roles of protocol contributors                                                                                                                                                                                                                                  | 5,14          |
|                                   | 5b      | Name and contact information for the trial sponsor                                                                                                                                                                                                                                       | 1             |
|                                   | 5c      | Role of study sponsor and funders, if any, in study design; collection, management, analysis, and interpretation of data; writing of the report; and the decision to submit the report for publication, including whether they will have ultimate authority over any of these activities | 14            |
|                                   | 5d      | Composition, roles, and responsibilities of the coordinating centre, steering committee, endpoint adjudication committee, data management team, and other individuals or groups overseeing the trial, if applicable (see Item 21a for data monitoring committee)                         | 11,12         |

## SPIRIT 2013 Checklist: Recommended items to address in a clinical trial protocol and related documents\*(continued)

| Section/item                                              | Item No | Description                                                                                                                                                                                               | Page |
|-----------------------------------------------------------|---------|-----------------------------------------------------------------------------------------------------------------------------------------------------------------------------------------------------------|------|
| <b>Introduction</b>                                       |         |                                                                                                                                                                                                           |      |
| Background and rationale                                  | 6a      | Description of research question and justification for undertaking the trial, including summary of relevant studies (published and unpublished) examining benefits and harms for each intervention        | 3–4  |
|                                                           | 6b      | Explanation for choice of comparators                                                                                                                                                                     | 4    |
| Objectives                                                | 7       | Specific objectives or hypotheses                                                                                                                                                                         | 4    |
| Trial design                                              | 8       | Description of trial design including type of trial (eg, parallel group, crossover, factorial, single group), allocation ratio, and framework (eg, superiority, equivalence, noninferiority, exploratory) | 5    |
| <b>Methods: Participants, interventions, and outcomes</b> |         |                                                                                                                                                                                                           |      |
| Study setting                                             | 9       | Description of study settings (eg, community clinic, academic hospital) and list of countries where data will be collected. Reference to where list of study sites can be obtained                        | 5    |
| Eligibility criteria                                      | 10      | Inclusion and exclusion criteria for participants. If applicable, eligibility criteria for study centres and individuals who will perform the interventions (eg, surgeons, psychotherapists)              | 6    |
| Interventions                                             | 11a     | Interventions for each group with sufficient detail to allow replication, including how and when they will be administered                                                                                | 7–8  |
|                                                           | 11b     | Criteria for discontinuing or modifying allocated interventions for a given trial participant (eg, drug dose change in response to harms, participant request, or improving/worsening disease)            | 8    |

**SPIRIT 2013 Checklist: Recommended items to address in a clinical trial protocol and related documents\*(continued)**

| Section/item         | Item No | Description                                                                                                                                                                                                                                                                                                                                                                    | Page               |
|----------------------|---------|--------------------------------------------------------------------------------------------------------------------------------------------------------------------------------------------------------------------------------------------------------------------------------------------------------------------------------------------------------------------------------|--------------------|
|                      | 11c     | Strategies to improve adherence to intervention protocols, and any procedures for monitoring adherence (eg, drug tablet return, laboratory tests)                                                                                                                                                                                                                              | 11                 |
|                      | 11d     | Relevant concomitant care and interventions that are permitted or prohibited during the trial                                                                                                                                                                                                                                                                                  | 8                  |
| Outcomes             | 12      | Primary, secondary, and other outcomes, including the specific measurement variable (eg, systolic blood pressure), analysis metric (eg, change from baseline, final value, time to event), method of aggregation (eg, median, proportion), and time point for each outcome. Explanation of the clinical relevance of chosen efficacy and harm outcomes is strongly recommended | 9–11               |
| Participant timeline | 13      | Time schedule of enrolment, interventions (including any run-ins and washouts), assessments, and visits for participants. A schematic diagram is highly recommended (see Figure)                                                                                                                                                                                               | Figure 1, Figure 4 |
| Sample size          | 14      | Estimated number of participants needed to achieve study objectives and how it was determined, including clinical and statistical assumptions supporting any sample size calculations                                                                                                                                                                                          | 11,12              |
| Recruitment          | 15      | Strategies for achieving adequate participant enrolment to reach target sample size                                                                                                                                                                                                                                                                                            | 5                  |

**Methods: Assignment of interventions (for controlled trials)**
**Allocation:**

|                     |     |                                                                                                                                                                                                                                                                                                                                                          |    |
|---------------------|-----|----------------------------------------------------------------------------------------------------------------------------------------------------------------------------------------------------------------------------------------------------------------------------------------------------------------------------------------------------------|----|
| Sequence generation | 16a | Method of generating the allocation sequence (eg, computer-generated random numbers), and list of any factors for stratification. To reduce predictability of a random sequence, details of any planned restriction (eg, blocking) should be provided in a separate document that is unavailable to those who enrol participants or assign interventions | 12 |
|---------------------|-----|----------------------------------------------------------------------------------------------------------------------------------------------------------------------------------------------------------------------------------------------------------------------------------------------------------------------------------------------------------|----|

**SPIRIT 2013 Checklist: Recommended items to address in a clinical trial protocol and related documents\*(continued)**

| Section/item                                              | Item No | Description                                                                                                                                                                                                                                                                                                                                                                                                  | Page           |
|-----------------------------------------------------------|---------|--------------------------------------------------------------------------------------------------------------------------------------------------------------------------------------------------------------------------------------------------------------------------------------------------------------------------------------------------------------------------------------------------------------|----------------|
| Allocation concealment mechanism                          | 16b     | Mechanism of implementing the allocation sequence (eg, central telephone; sequentially numbered, opaque, sealed envelopes), describing any steps to conceal the sequence until interventions are assigned                                                                                                                                                                                                    | 12             |
| Implementation                                            | 16c     | Who will generate the allocation sequence, who will enrol participants, and who will assign participants to interventions                                                                                                                                                                                                                                                                                    | 12             |
| Blinding (masking)                                        | 17a     | Who will be blinded after assignment to interventions (eg, trial participants, care providers, outcome assessors, data analysts), and how                                                                                                                                                                                                                                                                    | 12             |
|                                                           | 17b     | If blinded, circumstances under which unblinding is permissible, and procedure for revealing a participant's allocated intervention during the trial                                                                                                                                                                                                                                                         | Not applicable |
| <b>Methods: Data collection, management, and analysis</b> |         |                                                                                                                                                                                                                                                                                                                                                                                                              |                |
| Data collection methods                                   | 18a     | Plans for assessment and collection of outcome, baseline, and other trial data, including any related processes to promote data quality (eg, duplicate measurements, training of assessors) and a description of study instruments (eg, questionnaires, laboratory tests) along with their reliability and validity, if known. Reference to where data collection forms can be found, if not in the protocol | 12-13          |
|                                                           | 18b     | Plans to promote participant retention and complete follow-up, including list of any outcome data to be collected for participants who discontinue or deviate from intervention protocols                                                                                                                                                                                                                    | Not applicable |
| Data management                                           | 19      | Plans for data entry, coding, security, and storage, including any related processes to promote data quality (eg, double data entry; range checks for data values). Reference to where details of data management procedures can be found, if not in the protocol                                                                                                                                            | 12-13          |
| Statistical methods                                       | 20a     | Statistical methods for analysing primary and secondary outcomes. Reference to where other details of the statistical analysis plan can be found, if not in the protocol                                                                                                                                                                                                                                     | 13-14          |

**SPIRIT 2013 Checklist: Recommended items to address in a clinical trial protocol and related documents\*(continued)**



1  
2  
3  
4  
5  
6  
7  
8  
9  
10  
11  
12  
13  
14  
15  
16  
17  
18  
19  
20  
21  
22  
23  
24  
25  
26  
27  
28  
29  
30  
31  
32  
33  
34  
35  
36  
37  
38  
39  
40  
41  
42  
43  
44  
45  
46

| Section/item                    | Item No | Description                                                                                                                                                                                                                                                                                                                           | Page           |
|---------------------------------|---------|---------------------------------------------------------------------------------------------------------------------------------------------------------------------------------------------------------------------------------------------------------------------------------------------------------------------------------------|----------------|
|                                 | 20b     | Methods for any additional analyses (eg, subgroup and adjusted analyses)                                                                                                                                                                                                                                                              | 13-14          |
|                                 | 20c     | Definition of analysis population relating to protocol non-adherence (eg, as randomised analysis), and any statistical methods to handle missing data (eg, multiple imputation)                                                                                                                                                       | 13             |
| <b>Methods: Monitoring</b>      |         |                                                                                                                                                                                                                                                                                                                                       |                |
| Data monitoring                 | 21a     | Composition of data monitoring committee (DMC); summary of its role and reporting structure; statement of whether it is independent from the sponsor and competing interests; and reference to where further details about its charter can be found, if not in the protocol. Alternatively, an explanation of why a DMC is not needed | Not statement  |
|                                 | 21b     | Description of any interim analyses and stopping guidelines, including who will have access to these interim results and make the final decision to terminate the trial                                                                                                                                                               | 8              |
| Harms                           | 22      | Plans for collecting, assessing, reporting, and managing solicited and spontaneously reported adverse events and other unintended effects of trial interventions or trial conduct                                                                                                                                                     | 11             |
| Auditing                        | 23      | Frequency and procedures for auditing trial conduct, if any, and whether the process will be independent from investigators and the sponsor                                                                                                                                                                                           | Not applicable |
| <b>Ethics and dissemination</b> |         |                                                                                                                                                                                                                                                                                                                                       |                |
| Research ethics approval        | 24      | Plans for seeking research ethics committee/institutional review board (REC/IRB) approval                                                                                                                                                                                                                                             | 5              |
| Protocol amendments             | 25      | Plans for communicating important protocol modifications (eg, changes to eligibility criteria, outcomes, analyses) to relevant parties (eg, investigators, REC/IRBs, trial participants, trial registries, journals, regulators)                                                                                                      | 5              |

**SPIRIT 2013 Checklist: Recommended items to address in a clinical trial protocol and related documents\*(continued)**

| Section/item                  | Item No | Description                                                                                                                                                                                                                                                                         | Page           |
|-------------------------------|---------|-------------------------------------------------------------------------------------------------------------------------------------------------------------------------------------------------------------------------------------------------------------------------------------|----------------|
| Consent or assent             | 26a     | Who will obtain informed consent or assent from potential trial participants or authorised surrogates, and how (see Item 32)                                                                                                                                                        | 6              |
|                               | 26b     | Additional consent provisions for collection and use of participant data and biological specimens in ancillary studies, if applicable                                                                                                                                               | 6              |
| Confidentiality               | 27      | How personal information about potential and enrolled participants will be collected, shared, and maintained in order to protect confidentiality before, during, and after the trial                                                                                                | 12-13          |
| Declaration of interests      | 28      | Financial and other competing interests for principal investigators for the overall trial and each study site                                                                                                                                                                       | 16             |
| Access to data                | 29      | Statement of who will have access to the final trial dataset, and disclosure of contractual agreements that limit such access for investigators                                                                                                                                     | 16             |
| Ancillary and post-trial care | 30      | Provisions, if any, for ancillary and post-trial care, and for compensation to those who suffer harm from trial participation                                                                                                                                                       | Not applicable |
| Dissemination policy          | 31a     | Plans for investigators and sponsor to communicate trial results to participants, healthcare professionals, the public, and other relevant groups (eg, via publication, reporting in results databases, or other data sharing arrangements), including any publication restrictions | 14             |
|                               | 31b     | Authorship eligibility guidelines and any intended use of professional writers                                                                                                                                                                                                      | Not applicable |
|                               | 31c     | Plans, if any, for granting public access to the full protocol, participant-level dataset, and statistical code                                                                                                                                                                     | Not applicable |

**SPIRIT 2013 Checklist: Recommended items to address in a clinical trial protocol and related documents\*(continued)**

| Section/item               | Item No | Description                                                                                                                                                                                    | Page                        |
|----------------------------|---------|------------------------------------------------------------------------------------------------------------------------------------------------------------------------------------------------|-----------------------------|
| <b>Appendices</b>          |         |                                                                                                                                                                                                |                             |
| Informed consent materials | 32      | Model consent form and other related documentation given to participants and authorised surrogates                                                                                             | Not offer in the manuscript |
| Biological specimens       | 33      | Plans for collection, laboratory evaluation, and storage of biological specimens for genetic or molecular analysis in the current trial and for future use in ancillary studies, if applicable | Not applicable              |

\*It is strongly recommended that this checklist be read in conjunction with the SPIRIT 2013 Explanation & Elaboration for important clarification on the items. Amendments to the protocol should be tracked and dated. The SPIRIT checklist is copyrighted by the SPIRIT Group under the Creative Commons "[Attribution-NonCommercial-NoDerivs 3.0 Unported](http://creativecommons.org/licenses/by-nc-nd/3.0/)" license.

# BMJ Open

## The efficacy and neural mechanism of acupuncture treatment in older adults with Subjective Cognitive Decline: study protocol for a randomized controlled clinical trial

|                                 |                                                                                                                                                                                                                                                                                                                                                                                                                                                                                                                                                                                                                                                                                                                                                                                                                                                                                                                                                                                                                                                                                                                                                                                                                            |
|---------------------------------|----------------------------------------------------------------------------------------------------------------------------------------------------------------------------------------------------------------------------------------------------------------------------------------------------------------------------------------------------------------------------------------------------------------------------------------------------------------------------------------------------------------------------------------------------------------------------------------------------------------------------------------------------------------------------------------------------------------------------------------------------------------------------------------------------------------------------------------------------------------------------------------------------------------------------------------------------------------------------------------------------------------------------------------------------------------------------------------------------------------------------------------------------------------------------------------------------------------------------|
| Journal:                        | <i>BMJ Open</i>                                                                                                                                                                                                                                                                                                                                                                                                                                                                                                                                                                                                                                                                                                                                                                                                                                                                                                                                                                                                                                                                                                                                                                                                            |
| Manuscript ID                   | bmjopen-2018-028317.R2                                                                                                                                                                                                                                                                                                                                                                                                                                                                                                                                                                                                                                                                                                                                                                                                                                                                                                                                                                                                                                                                                                                                                                                                     |
| Article Type:                   | Protocol                                                                                                                                                                                                                                                                                                                                                                                                                                                                                                                                                                                                                                                                                                                                                                                                                                                                                                                                                                                                                                                                                                                                                                                                                   |
| Date Submitted by the Author:   | 16-Aug-2019                                                                                                                                                                                                                                                                                                                                                                                                                                                                                                                                                                                                                                                                                                                                                                                                                                                                                                                                                                                                                                                                                                                                                                                                                |
| Complete List of Authors:       | Yan, Chao-qun; Beijing University of Chinese Medicine, Acupuncture-Moxibustion and Tuina Beijing<br>Zhou, Ping; Beijing University of Chinese Medicine, School of Acupuncture-Moxibustion and Tuina<br>Wang, Xu; Beijing University of Chinese Medicine, School of Life Sciences<br>Tu, Jian Feng; Beijing University of Chinese Medicine, School of Acupuncture-Moxibustion and Tuina<br>Hu, Shang-Qing; Beijing University of Chinese Medicine, School of Acupuncture-Moxibustion and Tuina<br>Huo, Jian-Wei; Capital Medical University, Beijing Hospital of Traditional Chinese Medicine<br>Wang, Zhong-Yan; Capital Medical University, Beijing Hospital of Traditional Chinese<br>Shi, Guangxia; Beijing University of Chinese Medicine, School of Acupuncture-Moxibustion and Tuina<br>Zhang, Ya-Nan; Capital Medical University, Beijing Hospital of Traditional Chinese Medicine<br>Li, Jun-Qiu; Capital Medical University, Beijing Hospital of Traditional Chinese Medicine<br>Wang, Jun; Beijing University of Chinese Medicine Affiliated Dongzhimen Hospital, Department of Acupuncture and moxibustion<br>Liu, Cun-Zhi; Beijing University of Chinese Medicine, School of Acupuncture-Moxibustion and Tuina |
| <b>Primary Subject Heading</b>: | Neurology                                                                                                                                                                                                                                                                                                                                                                                                                                                                                                                                                                                                                                                                                                                                                                                                                                                                                                                                                                                                                                                                                                                                                                                                                  |
| Secondary Subject Heading:      | Neurology                                                                                                                                                                                                                                                                                                                                                                                                                                                                                                                                                                                                                                                                                                                                                                                                                                                                                                                                                                                                                                                                                                                                                                                                                  |
| Keywords:                       | Subjective cognitive decline, Dementia < NEUROLOGY, Acupuncture, Sham acupuncture, Magnetic resonance imaging < RADIOLOGY & IMAGING, Clinical trial                                                                                                                                                                                                                                                                                                                                                                                                                                                                                                                                                                                                                                                                                                                                                                                                                                                                                                                                                                                                                                                                        |
|                                 |                                                                                                                                                                                                                                                                                                                                                                                                                                                                                                                                                                                                                                                                                                                                                                                                                                                                                                                                                                                                                                                                                                                                                                                                                            |

SCHOLARONE™  
Manuscripts

1  
2  
3  
4  
5  
6  
7  
8  
9  
10  
11  
12  
13  
14  
15  
16  
17  
18  
19  
20  
21  
22  
23  
24  
25  
26  
27  
28  
29  
30  
31  
32  
33  
34  
35  
36  
37  
38  
39  
40  
41  
42  
43  
44  
45  
46  
47  
48  
49  
50  
51  
52  
53  
54  
55  
56  
57  
58  
59  
60

1  
2  
3 **The efficacy and neural mechanism of acupuncture treatment in older adults with**  
4 **Subjective Cognitive Decline: study protocol for a randomized controlled clinical trial**  
5

6  
7 Chao-Qun Yan<sup>1,2</sup>; Ping Zhou<sup>1</sup>; Xu-Wang<sup>3</sup>; Jian-Feng Tu<sup>1</sup>; Shang-Qing Hu<sup>1</sup>; Jian-Wei Huo<sup>4</sup>;  
8  
9 Zhong-Yan Wang<sup>4</sup>; Guang-Xia Shi<sup>1</sup>; Ya-Nan Zhang<sup>4</sup>; Jun-Qiu Li<sup>4</sup>; Jun Wang<sup>2</sup>; Cun-Zhi  
10  
11 Liu<sup>1</sup>  
12  
13

- 14  
15 1. School of Acupuncture-Moxibustion and Tuina, Beijing University of Chinese Medicine,  
16  
17 11 Beisanhuan East Road, Chaoyang District, Beijing 100029, China  
18  
19 2. Department of Acupuncture and moxibustion, Dongzhimen hospital Beijing University of  
20  
21 Chinese Medicine, Hai Yun Cang on the 5th Zip, Dongcheng District, Beijing 100700,  
22  
23 China  
24  
25 3. School of Life Sciences, Beijing University of Chinese Medicine, 11 Beisanhuan East  
26  
27 Road, Chaoyang District, Beijing 100029, China  
28  
29 4. Department of Radiology, Beijing Hospital of Traditional Chinese Medicine affiliated to  
30  
31 Capital Medical University, 23 Meishuguanhou Street, Dongcheng District, Beijing  
32  
33 100010, China

34 \*Corresponding author at:

35  
36 School of Acupuncture-Moxibustion and Tuina, Beijing University of Chinese Medicine, 11  
37 Beisanhuan East Road, Chaoyang District, Beijing 100029, China.

38  
39 E-mail address: lcz\_tg@126.com  
40  
41  
42

43 Word count: 4588  
44  
45  
46  
47  
48  
49  
50  
51  
52  
53  
54  
55  
56  
57  
58  
59  
60

## ABSTRACT

**Background:** Subjective cognitive decline (SCD) refers to individuals' perceived decline in memory and/or other cognitive abilities relative to their previous level of performance, while objective neuropsychological deficits are not observed. SCD may represent a preclinical phase of Alzheimer's disease. At this very early stage of decline, intervention could slow the rate of incipient decline to prolong and preserve cognitive and functional abilities. However, there is no effective treatments recommended for individuals with SCD. Acupuncture, as a non-pharmacologic intervention, has been widely employed for patients with cognitive disorders.

**Methods/Design:** The proposed study is a randomized, assessor-blinded and placebo-controlled study to investigate the efficacy and mechanism of acupuncture in SCD. Sixty patients with SCD will be randomly allocated either into an acupuncture group or a sham acupuncture group. They will receive 24 sessions of real acupuncture treatment or identical treatment sessions using a placebo needle. Global cognitive changes based on a multi-domain neuropsychological test battery will be evaluated to detect the clinical efficacy of acupuncture treatment at baseline and end of treatment. Magnetic Resonance Imaging (MRI) scans will be used to explore acupuncture related neuroplasticity changes. Correlation analyses will be performed to investigate the relationships between the changes in brain function and symptom improvement.

**Discussion:** This trial will investigate the effect of acupuncture in SCD patients. We will compare real acupuncture treatment with the sham acupuncture treatment by fMRI to verify neuroplasticity changes. The results of this trial may provide relevant evidences for acupuncture treatment on SCD and also reveal the underlying mechanisms of the treatment effect.

**Trial registration:** ClinicalTrials.gov NCT03444896. Retrospectively registered on 23 February 2018.

**Keywords:** Subjective cognitive decline; Dementia; Acupuncture; Sham acupuncture; Magnetic Resonance Imaging; Clinical trial



### Strengths and limitations of this study

Compared with the neuropsychological tests alone as efficacy evaluations, the combination with in-vivo measures of brain alterations in this study will be more sensitive in detecting acupuncture efficacy.

This study will firstly uncover the efficacy and neural mechanism of acupuncture treatment in older adults with SCD.

A multi-domain neuropsychological test battery will be employed, which can assess multiple cognitive domains including executive function, attention, visuospatial function, and language.

Sham needles and adhesive pads will be used for better patient blinding.

A potential limitation is that not a large sample size will be performed in this study.

### INTRODUCTION

Dementia is the greatest global challenge for health and social care in the 21st century [1]. Globally, about 47 million people were living with dementia in 2015, and this number is projected to triple by 2050, based on the World Alzheimer Report (2015). Alzheimer's disease (AD) is the most common form of dementia [2]. Currently, there is no effective cure for AD, and the available treatments have only moderately alleviate symptoms [3]. Therefore, prevention is essential to reduce the dementia epidemic [4 5]. The long "preclinical" phase of AD provides an opportunity for individuals to participate in treatment trials to delay or prevent cognitive decline [6-8].

Subjective cognitive decline (SCD) usually occurs in older adults, and it refers to the self-perception of cognitive decline, when individuals perform cognitive tests within normal limits and have preserved activities of daily living [9]. A review demonstrated that the prevalence of these complaints in persons aged 65 years or more varied from 25% to 50% [10]. Actually, many older adults claim cognitive decline might be regarded as hypochondriacs by professional healthy carers. However, several lines of evidence from longitudinal aging studies suggests that older adults with SCD are more likely to present AD biomarkers than their healthy peers. About 60% SCD individuals will decline to mild cognitive impairment (MCI) and AD over a 15-year

1  
2  
3 period [11 12]. People with SCD have more brain abnormalities such as hippocampal volume  
4 loss and hypometabolism compared with healthy controls [13]. Moreover, cerebrospinal amyloid  
5  $\beta$  is strongly predictive of subsequent clinical progression in patients with SCD [14]. This  
6 suggests that, for some older adults, SCD may represent a preclinical phase of AD.  
7  
8  
9

10  
11 There is still much plasticity in SCD. The patients in this stage may not progress to dementia  
12 or even revert to no cognitive impairment after effective treatment. Development of safe and  
13 effective interventions in early AD stages is important. Specific criteria to define SCD have been  
14 published [9 15], but clinical trials in SCD are in their infancy, and no pharmacological treatment  
15 or interventions is currently recommended for individuals with SCD. Despite these difficulties,  
16 the development of new treatments should be encouraged [16].  
17  
18  
19  
20

21  
22 The accumulated evidence suggests that non-pharmacologic intervention may benefit  
23 cognitive function in older adults with SCD [17]. Acupuncture, as a non-pharmacologic  
24 intervention, that has been widely used for patients with cognitive disorders. The WHO reports  
25 that acupuncture treatment can be beneficial for vascular dementia. A number of clinical studies  
26 have provided evidence that acupuncture is beneficial for the treatment of dementia or MCI [18].  
27 A systematic review supports the use of acupuncture for MCI [19]. Animal studies showed that  
28 acupuncture elicits its effects by mediation of neural plasticity in pathological conditions [20].  
29 However, the efficacy of acupuncture in patients with SCD has not be investigated. An  
30 experimental study is needed to test this hypothesis.  
31  
32  
33  
34  
35  
36  
37

38 By definition, individuals with SCD are within the normal range on clinical-  
39 neuropsychological tests. It will be difficult to detect response in this population compared with  
40 people who already have clinically manifest impairment (e.g., MCI) due to a ceiling effect. As  
41 such, neuropsychological tests in conjunction with in-vivo measures of brain function such as  
42 electroencephalo-graphy, or functional magnetic resonance imaging (fMRI), may be a more  
43 sensitive alternative to neuropsychological tests [21-23]. Brain alterations are subtle but  
44 measurable to identify individuals at risk for AD well before cognitive symptoms are manifested  
45 by using fMRI, allowing researchers to use neuroimaging to ascertain response after intervention  
46 sensitivity [24]. For better ascertaining the clinical response and unveiling the mechanism, brain  
47 alterations measured by fMRI could also be used to evaluate the efficacy of acupuncture.  
48  
49  
50  
51  
52  
53  
54  
55  
56  
57  
58  
59  
60

## OBJECTIVES

This study is a randomized controlled functional brain imaging trial with 12 weeks of treatment, aiming at: (1) evaluating the effects of acupuncture treatment on cognitive function in older adults with SCD; (2) exploring the central mechanism of the long-lasting effect of acupuncture on SCD; and (3) investigating the safety of acupuncture treatment on SCD.

## METHODS

### Design

General ethical approval was obtained from the ethics committee of the Beijing Hospital of Traditional Chinese Medicine affiliated to Capital Medical University on 29 January, 2018. The study was registered under [clinicaltrials.gov](http://clinicaltrials.gov) (NCT03444896). The CONSORT statement for non-pharmacological interventions has been used as a framework for development of the methodology for this project [25 26].

This trial is a 1:1 randomized single-blinded, and placebo-controlled study with two parallel groups involving elderly adults. The study is designed to examine the effect and neural mechanism of acupuncture treatment on cognitive function before and after a 12 weeks intervention period. As shown in Figure 1, the cognitive assessments and MRI scans will be performed at baseline and immediately after the completion of the intervention.

### Participants

The study will mainly take place in Dongcheng, Fengtai, and Shunyi District in Beijing. People with SCD will be recruited from community-dwelling population in those Districts. In order to have better insight into the trial for community residents, science popularization lectures about dementia and advertisement of the trial will be given in community service centers. The brochures and posters will also be distributed. Besides, advertisement of the trial will be shared in the official account on WeChat (China's most popular social media platform) of the Beijing Hospital of Traditional Chinese Medicine affiliated to Capital Medical University and health web site ([www.39.net](http://www.39.net)) or local newspaper for recruiting participants. Interested individuals will be screened in the clinic, community service centers or by phone using the inclusion/exclusion criteria. All those who meet the inclusion criteria will receive a study information sheet including

1  
2  
3 the design, procedure, benefits, and risks of the study. Before the study procedure started, the  
4 subjects will have to provide signed written informed consent forms. The diagnosis of SCD will  
5 be based on the published SCD research criteria proposed by the Subjective Cognitive Decline  
6 Initiative (SCD-I) [9]. In this study, the patients who answer “yes” to the question “Do you have  
7 problem in memory?” in the initial screening by phone or face-to-face interviews, will be  
8 selected to the next step. Besides, the Subjective Cognitive Decline questionnaire 9 (SCD-Q9)  
9 are further used for SCD screening. Only the patients with the SCD-Q9 score more than 5.0 will  
10 pass the screening.  
11  
12  
13  
14  
15  
16  
17

### 18 **Inclusion criteria**

- 19
- 20 •Male and female adults aged 55-75;
- 21
- 22 •Native Chinese speakers who are right-handed and have at least a primary school  
23 education;
- 24
- 25 •Self-reported persistent memory decline compared with a previous normal status within  
26 the last 5 years, which is confirmed by caregivers;
- 27
- 28
- 29 •Normal age- and education-adjusted performance on neuropsychological test including  
30 the Chinese version of Mini-Mental State Examination (MMSE) [27], the auditory  
31 verbal learning test (the short-term delayed free recall, the long-term delayed free  
32 recall, and the recognition test) [28], Trail Making Test [29], and Animal Fluency Test  
33 [30].
- 34
- 35
- 36
- 37 •No or minimal impairment in activities of daily living;
- 38
- 39

### 40 **Exclusion criteria**

- 41
- 42 •Presence of a positive neurologic history (e.g., traumatic brain injury, stroke, Parkinson's  
43 disease, multiple sclerosis);
- 44
- 45
- 46 •Treatments that would affect cognitive function (e.g., treatment for an acute psychiatric  
47 episode, therapy with memantine, rivastigmine and donepezil);
- 48
- 49 •Presence of significant psychiatric history (e.g., bipolar disorder, schizophrenia) and/or  
50 severe anxiety and depression;
- 51
- 52
- 53 •Presence of serious heart, kidney, liver, gastrointestinal, infectious, endocrine disease or  
54 cancer;
- 55
- 56
- 57
- 58
- 59

- History of alcohol or drug abuse/addiction;
- Any contraindications for MRI scans (e.g., aneurysm clip pacemaker);
- Significant visual and/or auditory impairment uncorrected by aids, and unable to perform neuropsychological evaluations;
- Currently enrolled in another research study;
- Received acupuncture treatment in the preceding month;

During the trial period, patients with SCD who meet the following criteria will be excluded from the study:

- taking medication or receiving additional treatment that is expected to affect the cognitive function (e.g., tranquilizers, antianxiolytics, hypnotics, nootropics, and cholinomimetic agents);
- withdrawal of consent for study participation because the patients does not wish to continue;
- missing more than 5 of 24 acupuncture treatment sessions;
- occurrence of a serious adverse event that the doctors consider the treatment should be termination;
- critical protocol violation such as violation of eligibility criteria.

## Intervention

Patients will receive 24 acupuncture treatment sessions over 12 weeks (twice a week). Hwato brand single-use acupuncture needles (size  $0.35 \times 25$  mm or  $0.35 \times 40$  mm), pragmatic placebo needles (size  $0.30 \times 25$  mm), and SDZ-V electroacupuncture apparatuses will be used.

For the acupuncture group (Figure 2), acupuncture needles will be placed at acupoints Baihui (DU20), Shengting (DU24), Fengfu (DU16), Fengchi(GB20), Danzhong (RN17), Zhongwan (RN12), Qihai (RN6), Neiguan (PC6), Tongli (HT5), Xuehai (SP10), Zusanli (ST36), Zhaohai (KI6), Xinshu (BL15), and Yixi (BL45). After skin disinfection in patient in the supine position, the adhesive pads are pasted on the acupoints surface except for Baihui (DU20) and Shengting (DU24). Then, the acupuncture needles will be inserted through the adhesive pads into the skin depending on the location of the needle. The location is show in Table 1. Manual acupuncture by acupuncturists using a small, equal manipulations of twirling, lifting, and thrusting will be

performed on all needles to reach deqi. The patients will feel the deqi sensation, such as soreness, numbness, distention, heaviness, and other sensations. Paired electrodes from the electroacupuncture apparatus will be attached to the needle holders of the DU20 and DU24. A dilatational wave of 2-100 Hz and a current intensity of 1 to 5 mA will be performed following by the degree of needle handle shivering, ignoring the patient's feelings. The needles will be extracted after 20 minutes for each treatment. The acupoints of DU16, BL15 and BL45 will achieve deqi in patients in a sitting position without retaining the needle.

**Table 1.** Location of Acupoints Used in the Acupuncture Group

| Acupoints        | Location                                                                                                                                                                                       | Depth       |
|------------------|------------------------------------------------------------------------------------------------------------------------------------------------------------------------------------------------|-------------|
| Baihui (DU20)    | 5 cun directly above the midpoint of the posterior hairline, or at the midpoint of the line connecting the apexes of the two auricles.                                                         | 0.2 cun     |
| Shengting (DU24) | 1.0 cun directly above the midpoint of posterior hairline.                                                                                                                                     | 0.2 cun     |
| Fengfu (DU16)    | On the back of neck, 1 cun directly above the midpoint of the posterior hairline, directly below the external occipital protuberance.                                                          | 0.5~0.1 cun |
| Fengchi(GB20)    | On the nape, below the occiput, at the level of Fengfu, in the depression between the upper portion of sternocleidomastoideus and trapezius muscle.                                            | 0.5~0.8 cun |
| Danzhong (RN17)  | On the anterior median line of the chest, at the level of the fourth intercostal space, at the midpoint between the two nipples.                                                               | 0.5 cun     |
| Zhongwan (RN12)  | On the the anterior median line of the upper abdomen, 4 cun above the umbilicus.                                                                                                               | 1~1.5 cun   |
| Qihai (RN6)      | On the anterior median line of the lower abdomen, 1.5 cun below the umbilicus.                                                                                                                 | 1~1.5 cun   |
| Neiguan (PC6)    | On the palmar aspect of forearm, 2.0 cun above the transverse crease of the wrist, between the tendons of palmaris longus and flexor carpi radialis muscle.                                    | 0.5~0.1 cun |
| Tongli (HT5),    | On the radial aspect of the tendon of the ulnar flexor muscle of the wrist, and 1 cun above the carpal crease.                                                                                 | 0.3~0.5 cun |
| Xuehai (SP10)    | When the knee is flexed, on the medial aspect of the thigh, the point is 2 cun above the mediosuperior border of the patella, on the bulgs of the medial portion of muscle quadriceps femoris. | 0.8~1 cun   |
| Zusanli (ST36)   | 3 cun directly below Dubi* and one finger-breadth lateral to the anterior border of the tibia.                                                                                                 | 0.8~1 cun   |
| Zhaohai (KI6)    | On the depression below the tip of the medial malleolus.                                                                                                                                       | 0.5~0.8 cun |
| Xinshu (BL15)    | 1.5 cun from the lower border of the spinous process of the fifth thoracic vertebra.                                                                                                           | 0.3~0.5 cun |
| Yixi (BL45)      | 3 cun from the lower border of the spinous process of the sixth thoracic vertebra.                                                                                                             | 0.5~0.8 cun |

Dubi\* location = When the knee is flexed, the point is at the knee, below the patella, in the depression from the patella ligament.

For the sham acupuncture group, sham acupoints at locations away from known acupuncture points will be used to minimize physiological effects, and the location of sham acupoints are

showed in Table 2. Patients will receive non-insertive acupuncture using the pragmatic placebo needles (Hwato brand, size 0.35 × 25 mm; supplement figure 1). As same as in the acupuncture group, the adhesive pads are initially pasted on the sham acupoints surface except for sham acupoint 1. The pragmatic placebo needles with a blunt tip will be placed on the adhesive pads. In order to minimize the physiological effect, acupuncturists will be instructed to lightly place the sham needles with a blunt tip on the adhesive pads with no manipulation. The acupuncture needle will be inserted to a shallow depth at the sham acupoint 1, which does not penetrate below the skin, and needle manipulation for *deqi*. Sham acupoint 11 and Sham acupoint 12 will be inserted with sham needles without retaining the needle. Paired electrodes will be attached the needle holders of the bilateral sham acupoint 2 but with no electricity output.

**Table 2.** Location of sham acupoints used in the sham acupuncture group.

| Sham Acupoints   | Location                                                                                      |
|------------------|-----------------------------------------------------------------------------------------------|
| Sham acupoint 1  | Midpoint of Shuaigu (GB8) and Touwei (ST8)                                                    |
| Sham acupoint 2  | Midpoint of Touwei (ST8) and Yangbai(GB14)                                                    |
| Sham acupoint 3  | Midpoint between Tianyou (SJ16) and Tianrong(SI17)                                            |
| Sham acupoint 4  | 4 cun above the umbilicus and 1 cun right of the umbilical midline                            |
| Sham acupoint 5  | 2 cun below the umbilicus and 1 cun right of the umbilical midline                            |
| Sham acupoint 6  | 1 cun outside the point 1/4 of the line between Shenmen (HT7) and Shaohai (HT3)               |
| Sham acupoint 7  | 1 cun outside the midpoint of Shenmen (HT7) and Shaohai (HT3)                                 |
| Sham acupoint 8  | 6 cun above mediosuperior border of the patella                                               |
| Sham acupoint 9  | 3 cun below the Yanglingquan (GB34) and in the middle of the gallbladder and bladder channels |
| Sham acupoint 10 | Midpoint between Jiexi (ST 41) and Qiuxu (GB40)                                               |
| Sham acupoint 11 | 2 cun from the lower border of the spinous process of the fifth thoracic vertebra             |
| Sham acupoint 12 | 2 cun from the lower border of the spinous process of the sixth thoracic vertebra             |

## MRI protocol



1  
2  
3 Patients will undergo brain MRI at baseline and after treatments. The MRI scan will be  
4 performed with a 3.0 Tesla superconductor (Skyra, Siemens, Erlangen, Germany) in the Beijing  
5 Hospital of Traditional Chinese Medicine Affiliated to Capital Medical University. The  
6 parameters of sequences employed in this study are provided by China Association of Brain  
7 Imaging ([www.abimaging.org](http://www.abimaging.org)). Sagittal structural images will be acquired using a magnetization  
8 prepared rapid gradient echo (MP-RAGE) three-dimensional T1-weighted sequence with the  
9 following parameters: TR/TE = 2,530/2.98 ms, flip angle = 7°, inversion time = 1100 ms, matrix  
10 = 256 × 256, 1 mm slice thickness without slice gap. T2\*-weighted functional images will be  
11 collected using a gradient-echo echo-planar imaging sequence with the following parameters:  
12 repetition time = 3200 ms, echo time = 407 ms, flip angle = 120°.

21 Resting state-fMRI and task fMRI will be performed using an echo planar imaging (EPI)  
22 sequence with the following parameters: TR/TE = 2,000/30 ms, flip angle = 90°, matrix = 64 ×  
23 64, slice thickness = 3.5 mm with 1 mm slice gap. Diffusion tensor imaging (DTI) will use a  
24 double spin-echo echo-planar imaging sequence (TR/TE = 12,000/77 ms, flip angle = 90°,  
25 Volume interval = 12, 2 mm thick axial slices). ASL imaging of the whole brain is performed by  
26 use of a 3D pseudocontinuous ASL sequence (TR/TE = 5,000/ 15.92 ms, flip angle = 180°, Slice  
27 thickness = 3.5 mm; labeling duration, number of slices = 40).

34 All scans will be reviewed qualitatively by two radiologists to screen for possible brain  
35 lesions or structural abnormalities. DTI images will be analyzed using the PANDA package [31].  
36 Functional MRI data collected during the memory task and at rest. ASL data will be performed  
37 with the Resting-State fMRI (DPARSF) toolbox and SPM8  
38 (<http://www.fil.ion.ucl.ac.uk/spm/software/spm8>) for MATLAB. Brain activation, connectivity  
39 changes, and cerebral blood flow will be compared between two groups before and after  
40 treatment.

## 46 **Outcome measures**

### 49 *Clinical outcome assessments*

51 Global cognitive function based on a composite score will be used to evaluate the clinical  
52 efficacy of acupuncture treatment at baseline, and at the end of the 12 weeks treatment period. It  
53 will be computed by averaging z-scores from a multi-domain neuropsychological test battery that  
54  
55  
56  
57  
58  
59

1  
2  
3 includes 8 tests. Animal Fluency Test (AFT) that assess the language and executive function by  
4 examining categorical verbal fluency [30]. Trail Making Test (TMT) part A and B examines  
5 graphomotor speed, attention, and executive function [32]. Digit Symbol Substitution Test  
6 (DSST) is used to assess processing speed, attention and concentration [33]. Clock Drawing Test  
7 (CDT) can assess multiple cognitive functions, including verbal understanding, memory, abstract  
8 thinking, and executive functions [34]. Digit-Span Test (DST) is used to measure working  
9 memory's number storage capacity. Stroop color word test (SCWT) is a classic instrument for the  
10 assessment of selective attention, cognitive flexibility, cognitive inhibition, and information  
11 processing speed [35]. Auditory Verbal Learning Test (AVLT) a powerful neuropsychological  
12 test to assess episodic memory [36 37].

13  
14  
15 All patients will fill out a subjective cognitive decline questionnaire (SCDQ) [38] to assess  
16 their degree of subjective cognitive decline. The Face recognition questionnaire and Santa  
17 Barbara Sense of Direction scale [39] will be used to measure the ability for facial recognition  
18 and direction. Depressive symptoms, and sleep quality will be measured by Geriatric Depression  
19 Scale and Pittsburgh Sleep Quality Index (PSQI) [40].

### 20 21 22 *Neuroplasticity assessments*

23  
24  
25 In this study, neuroplasticity changes between the two groups will be measured by fMRI.  
26 Before the acupuncture treatment, patients will complete the fMRI scan within 3 days. They will  
27 also have the follow up fMRI scan within 3 days after the completion of their intervention  
28 (Figure 3). Brain activity and functional connectivity will be assessed under a resting state and a  
29 memory task. Group difference on cerebral blood flow and white matter integrity will be  
30 assessed by means of arterial spin labeling (ASL) or diffusion tensor imaging (DTI).

31  
32  
33 *Memory task.* The patients will be trained before entering the fMRI scanner. They will  
34 complete a practice version of the memory task paradigm in computer. This practice mock test  
35 will show the correct number, and they need to perform the tasks with an accuracy criterion of  
36 80% to ensure that the patients understand how to do the memory task in the scanner. A blocked  
37 periodic design that incorporated alternating 1-back, and 2-back tasks will be used. Patients will  
38 view facial pictures, scene pictures or single digits (0–9, black on a white background). In the 1-  
39 back task, the patients are required to press a button when a facial picture, scene picture or digit  
40 appears that is the same as the one before. In the 2-back task, the patients are asked to press a  
41  
42  
43  
44  
45  
46  
47  
48  
49  
50  
51  
52  
53  
54  
55  
56  
57  
58  
59  
60

1  
2  
3 response button if the current facial picture, scene picture or digit is the same as the one which  
4 was presented two trials before. The stimuli consist of 17 blocks for 236 seconds and are  
5 presented on a computer using MATLAB 8.6 (Mathworks, Inc., Natick, MA, USA) for 1 second,  
6 with an inter-stimulus interval of 1 second. Trial types within blocks are presented in  
7 pseudorandomized order.  
8  
9

10  
11  
12 Once in the scanner, anatomical and functional scans will be performed. During the scanning,  
13 all patients are asked to lie quietly in the scanner with their eyes open, trying to avoid thinking  
14 systematically, and moving as little as possible. In resting state fMRI scanning, the patients are  
15 instructed to view centrally placed fixation cross (+), and try to not think of anything. Two  
16 memory task runs will be conducted after T1 and resting state scans, then following by ASL, and  
17 DTI scans.  
18  
19  
20  
21  
22

### 23 **Apolipoprotein E genotyping**

24  
25  
26 A TIANamp Blood DNA Kit (TIANGEN BIOTECH, Beijing, China) will be used to isolate  
27 High-molecular-weight DNA. The genotype of APOE will be detected by APOE Gene Detection  
28 Kit (Wuhan YZY Biopharma, Wuhan, China) with E2 and E4 reaction liquid. Genomic DNA  
29 and reaction liquid will be placed on a 7500 HT Fast Real-Time PCR (Applied Biosystems, Foster  
30 City, USA) with the following conditions: Uracil-N-Glycosylase treatment at 37 °C for 10  
31 minutes, denaturation at 95 °C for 5 minutes, followed by 40 cycles at 95 °C for 15s and  
32 annealing at 60 °C for 60s (acquiring the fluorescence signal in this step). According to the  
33 amplification plot, the genotype of APOE will be determined.  
34  
35  
36  
37  
38  
39

### 40 **Safety and Monitoring**

41  
42  
43 Treatment-related adverse events, including hematoma, bleeding, subcutaneous hemorrhage,  
44 serious pain, local infection and fatigue will be compared among patients in the acupuncture  
45 group and the sham acupuncture group, and will be documented at each treatment session. In  
46 order to ensure consistency, the neuropsychological tests and other assessment scales will be  
47 performed by the same researcher at baseline and the end of treatment. A professional staff will  
48 check the imaging data for quality and protocol conformity after each scanning session. Patients  
49 will undergo blood routine test and blood biochemical tests including blood glucose,  
50 homocysteine, total cholesterol, etc. before randomization and at the end of treatment.  
51  
52  
53  
54  
55  
56  
57  
58  
59

## Sample size and blinding

Task fMRI studies characteristically include small sample size [41] and thus have a low statistical power. The statistically underpowered study by definition means that a study will have less of a chance for detecting significant effects [42]. Therefore, power-based sample size will be calculated prior to fMRI data collection [43]. Fortunately, approaches for sample size calculations in studies using functional magnetic resonance imaging have been developed.

By using the non-central random field theory, Hayasaka et al estimated that at least 12 subjects would be required to detect signals in either of the auditory cortices with at least 80% power [44]. They also found that approximately 13 subjects would be required to detect signals in the auditory cortices with 80% power, when generated a sample size map based on the mock pilot analysis. Adopting a simulation-based method to calculate statistical power for group-level fMRI studies, Desmond and Glover found a minimum of 12 subjects are required to achieve 80% power at  $\alpha = 0.05$  at the single voxel level [45]. For a more realistic thresholds, twice as many subjects are recommended to maintain this level of power after correcting for multiple comparisons. For a stricter alpha of 0.000002, approximately 25 subjects are needed. Mumford and Nichol recommended 20 subjects and a Type I error of  $\alpha = 0.005$  should probably be used, and this power calculation is based on a non-central T or F distribution [46]. We used the largest sample size of 25 for each group with an estimated dropout rate and loss of data due to head motion, then we planned to enroll 60 participants in the two groups.

Eligible patients will be randomly assigned into either the acupuncture or sham acupuncture group after signed written informed consent forms via a randomization digital table with a 1:1 ratio. Blocked randomization with a block size of 6 will be employed to ensure balance within the two groups. The randomization sequence will be generated by a third-party professional statistician using computer-generated randomization the digital table by using SAS 9.2 (SAS Institute Inc., Cary, NC, USA). The randomization list will be stored by a noninvolved investigator and out of reach and sight of the involved investigators. The allocation schedule using a telephone randomization procedure. The randomization list was restricted to this research coordinator and was concealed from other study personnel. The patients, outcome assessors, and statisticians will be blinded to treatment allocation. Patients are told that they will receive one of two effective interventions randomized after enrolment. During the acupuncture treatment, the

1  
2  
3 adhesive pads are pasted on the acupoints or sham acupoints after skin disinfection. The true or  
4 sham needles with a blunt tip will place in the adhesive pads. Patients in different groups will be  
5 separated into cubicles to refrain from communication.  
6  
7

## 8 9 **Data collection and management**

10  
11 At baseline, information of patients about age, sex, education, dominant hand, and medical  
12 history will be collected (Figure 4). For all patients that met the inclusion criteria, the  
13 neuropsychological tests will be performed before and after treatment in a quiet room by  
14 evaluators, who have been trained by the organization of Alliance of early AD. All of the MRI  
15 scans will be conducted in the same machine, and the operators have been technically trained by  
16 a professional engineer from the China Association of Brain Imaging. Blood samples will be  
17 collected in the morning and handled by 2 persons. After each treatment session, adverse event  
18 will be recorded in participant's diary card by acupuncturists.  
19  
20  
21  
22  
23  
24  
25

26 A case report form (CRF) will be used to collect the clinical data for each patient, labeled by  
27 unique numeric identifier and recorded by a trained graduate student. The data in the CRF will  
28 be verified for accuracy, missing data, and data consistency by a clinical research associate.  
29 Paper-based research data will be entered into an EpiData electronic database. For reducing  
30 errors in data entry, data will be entered independently twice by two independent people, and  
31 value pairs will then be compared for discordances, followed by resolution of discordances by  
32 referral to the original data source. The EpiData will export data in a Microsoft Excel  
33 spreadsheet formats. The data will be entered in an electronic Statistical Package SPSS software  
34 (SPSS 12.0 KO for Windows ©) for ease of statistical analysis.  
35  
36  
37  
38  
39  
40  
41

## 42 **Statistical analysis**

### 43 *Clinical data analysis*

44  
45 In this study, intent-to-treat analysis and per protocol analysis will be used. In this study, the  
46 intent-to-treat population consisted of all randomized patients who received at least one dose of  
47 treatment and had a complete baseline assessment. The per protocol population defined as all  
48 randomized patients who did not discontinue prematurely, completed the 12 weeks treatment and  
49 had MRI scans before and after treatment. Observation of histograms and normal probability  
50 plots and a Shapiro–Wilk test will be performed to determine the data whether followed a normal  
51  
52  
53  
54  
55  
56  
57  
58  
59  
60

1  
2  
3 distribution. Distributed data will be described using means, standard deviations, and 95%  
4 confidence intervals (CIs). Clinical outcome analyses will be done with SPSS software (SPSS  
5 22.0 KO for Windows ©), with a significance level of 0.05, and all hypothesis tests are two-  
6  
7 tailed.  
8  
9

10  
11 Baseline demographic characteristics between the two groups will be analyzed with  $\chi^2$  test or  
12 Fisher's exact test for categorical measures, and with the T-test or Wilcoxon rank-sum test for  
13 continuous measures. The clinical outcome of the global cognitive function based on composite  
14 scores will be compared between the acupuncture group and sham acupuncture group. The  
15 composite scores will be created by converting all individual cognitive scores to standardized z  
16 scores. As previously described [47], we computed z-scores by subtracting the baseline group  
17 mean and dividing the baseline group standard deviation, and then averaging the standardized z  
18 scores across all tests. The general linear model will be used to examine change in cognitive  
19 scores. For the other outcomes, if it agreed with normal distribution, an independent T-test will  
20 used. Otherwise, for abnormal distribution, the data will be analyzed with Wilcoxon's test. The  
21 statisticians who analyzed the data are blinded to the test settings.  
22  
23  
24  
25  
26  
27  
28  
29

### 30 ***MRI data analysis***

31  
32  
33 For imaging data will be analyzed using DPABI toolkit performing on MATLAB 8.6  
34 (Mathworks, Inc., Natick, MA, USA) to detect any changes in brain function due to acupuncture  
35 treatment. After data preprocessing, some graph theory-based or data driven approaches will be  
36 performed to investigate neuroplasticity between the two groups, such as regional homogeneity,  
37 amplitude of the low-frequency fluctuation, and voxel-wise degree centrality. A two-sample t-  
38 test will be conducted to investigate the differences in brain regions between the acupuncture  
39 group and the sham acupuncture group in the DPARSF software. Multiple comparisons will be  
40 used in order to better control for a highly inflated false positivity rate. Pearson's correlation  
41 analysis will be performed to examine the association between the fMRI image data and clinical  
42 variables.  
43  
44  
45  
46  
47  
48  
49

### 50 **Ethics and dissemination**

51  
52  
53 General ethical approval has been obtained from the ethics committee of the Beijing Hospital  
54 of Traditional Chinese Medicine affiliated to Capital Medical University on 29 January, 2018  
55  
56  
57  
58  
59



1  
2  
3 (Ref: 2017BL-061-02). The study was registered under clinicaltrials.gov (NCT03444896). The  
4 CONSORT statement and the CONSORT statement for non-pharmacological interventions have  
5 been used as a framework for development of the methodology for this project [24 25].  
6  
7

8  
9 If any modifications or decision are made, amendments will be reviewed and approved by the  
10 ethics committee, and new protocols would be uploaded to Clinicaltrials.gov. The results of the  
11 study will be published in a peer-reviewed academic journal and will also be disseminated  
12 electronically through conference presentations.  
13  
14  
15

### 16 **Patient and public involvement**

17  
18  
19 Currently, this trial is at the recruitment phase with no patient involved in. The participants  
20 will be able to view the study results via social media.  
21  
22

### 23 **DISCUSSION**

24  
25 SCD, may be the initial phase of AD, and could serve as a window of opportunity for  
26 interventions at an early disease stage [23]. This study is planned as a randomized, assessor-  
27 blinded, placebo-controlled trial to evaluate the efficacy and central mechanism of acupuncture  
28 treatment on SCD compared with a sham acupuncture group. To our knowledge, this trial is also  
29 the first study to investigate the effect of acupuncture in SCD patients.  
30  
31  
32  
33

34  
35 This study has several strengths. First, we will assess patients with SCD on multiple levels,  
36 including multi-domain neuropsychological tests, functional brain alterations, cerebrovascular  
37 risk factors, and AOPE genotyping. This multi-domain assessment will be used to identify  
38 possible biomarkers involved in the effects of acupuncture in SCD.  
39  
40  
41

42  
43 Second, the neuropsychological assessment in the present study is a multi-domain  
44 neuropsychological test battery that included eight tests, which can assess multiple cognitive  
45 domains including executive functions, attention, visuospatial functioning, and language.  
46 Memory decline associated with AD risk factors [48 49], and then most instruments were used  
47 previously to measure SCD focus on memory [50]. However, it might be too restrictive to limit  
48 the SCD assessment to memory, in particular for atypical forms of AD [9 51]. In this study,  
49 multi-domain cognitive function will be assessed.  
50  
51  
52  
53  
54  
55  
56  
57  
58  
59  
60



1  
2  
3 Additionally, functional brain alterations will be used as outcome measures. Compared with  
4 the neuropsychological tests alone, the combination of in-vivo measures of brain alterations in  
5 this study will be more sensitive in detecting acupuncture efficacy. A smaller training effect and  
6 ceiling effect may be found when using MRI [52]. Furthermore, it can be used as a tool to  
7 understand the mechanism of the acupuncture's effects. Functional MRI can identify whether  
8 neural efficiency is improved or the brain connectome is reorganized to achieve cognitive  
9 enhancement [53].  
10  
11  
12  
13  
14  
15

16 A potential limitation is that the patients in this study will be recruited from the community.  
17 Considering the research environment, individuals recruited from a memory clinic may have a  
18 higher probability of having preclinical AD. They had specific concerns sufficient to prompt a  
19 medical visit [15]. However, community based studies have shown some predictive value of  
20 SCD for cognitive decline and dementia [10 54]. Another potential limitation of our study is that  
21 it will not include a large sample size, and this may lead to the need for a future study. The main  
22 feature of our study is to systemically investigate and analyze the central mechanisms of  
23 acupuncture treatment in patients with SCD. The findings may provide deeper insight into the  
24 benefits and mechanisms of acupuncture for patients with SCD.  
25  
26  
27  
28  
29  
30  
31

### 32 **Trial status**

33  
34 This trial is currently in the recruitment phase.  
35  
36  
37  
38  
39  
40  
41

### 42 **Figure Legends**

43  
44 **Figure 1.** Flow chart.  
45

46 **Figure 2.** Location of acupoints or sham acupoints in the trial. Abbreviation: SA Sham acupoint, DU20  
47 Baihui, DU24 Shengting, DU16 Fengfu, GB20 Fengchi, RN17 Danzhong, RN12 Zhongwan, RN6 Qihai,  
48 PC6 Neiguan, HT5 Tongli, SP10 Xuehai, ST36 Zusanli, KI6 Zhaohai , BL15 Xinshu, BL45 Yixi.  
49  
50

51  
52 **Figure 3.** Magnetic resonance imaging experimental paradigm and an Illustrative diagram of the  
53 memory task.  
54  
55  
56  
57  
58  
59  
60

1  
2  
3 **Figure 4.** Standard Protocol Items: Recommendations for Interventional Trials (SPIRIT) and the  
4 schedule of the trial.  
5

6  
7 **Supplement figure 1.** (a) The adhesive pads and sham needles with a blunt tip; (b) The adhesive  
8 pad was pasted on the surface of skin; (c) The sham needle was placed on the adhesive pad.  
9

## 10 11 **Footnotes**

12  
13  
14 **List of abbreviations** SCD: Subjective Cognitive Decline; AD: Alzheimer's disease; MCI:  
15 Mild Cognitive Impairment; APOE: apolipoprotein E; MRI: Magnetic Resonance Imaging; AFT:  
16 Animal Fluency Test; TMT: Trail Making Test; DSST: Digit Symbol Substitution Test; SCWT:  
17 Stroop Color Word Test; AVLT: Auditory Verbal Learning Test; SCDQ: Subjective Cognitive  
18 Decline Questionnaire; SBSDS: Santa Barbara Sense of Direction Scale; HAMD: Hamilton  
19 Rating Scale for Depression; HAMA: Hamilton Rating Scale for Anxiety; PSQI: Pittsburgh  
20 Sleep Quality Index.  
21

22  
23 **Ethics approval and consent to participate** Ethics approval The Research Ethical Committee  
24 of Beijing Hospital of Traditional Chinese Medicine Affiliated to Capital Medical University  
25 approved the trial. The methods were carried out in accordance with the Declaration of Helsinki.  
26 Informed written consent was obtained from each patient.  
27

28 **Consent for publication** Not applicable.  
29

30 **Availability of data and materials** Not applicable. This is a study protocol only and as such no  
31 unpublished data are available.  
32

33 **Competing interests** The authors declare that they have no competing interests.  
34

35 **Funding** This work was supported by the National Natural Science Foundation of China (Grant  
36 No. 81674055) and supported by the Fundamental Research Funds for the Central Universities  
37 (2017-JYB-JS-018). We declared the study was only supported by the governmental funding,  
38 and the study did not receive funding/assistance from a commercial organization.  
39

40 **Authors' contributors** Conceived and designed the experiments: CZL and JWH. Performed the  
41 experiments: PZ, ZYW, SQH, CQY, GXS, JQL, YNZ. Analyzed the data: XW, JW, JFT. Wrote  
42 the paper: CQY, XW and CZL. All authors approved the final manuscript.  
43

44 **Provenance and peer review** Not commissioned; externally peer reviewed.  
45  
46  
47  
48  
49  
50  
51  
52  
53  
54  
55  
56  
57  
58  
59  
60

**REFERENCES**

1. Livingston G, Sommerlad A, Orgeta V, et al. Dementia prevention, intervention, and care. *Lancet* 2017;**390**(10113):2673-734
2. Delbeuck X, Van der Linden M, Collette F. Alzheimer's disease as a disconnection syndrome? *Neuropsychol Rev* 2003;**13**(2):79-92
3. Ong SS, Doraiswamy PM, Lad EM. Controversies and Future Directions of Ocular Biomarkers in Alzheimer Disease. *JAMA neurology* 2018
4. WHO. Dementia: a public health priority. Geneva: World Health Organization—Alzheimer's Disease International hwwimhpdrea.
5. G8 dementia summit declaration. <https://www.gov.uk/government/publications/g8-dementia-summit-agreements>.
6. Sperling RA, Aisen PS, Beckett LA, et al. Toward defining the preclinical stages of Alzheimer's disease: recommendations from the National Institute on Aging-Alzheimer's Association workgroups on diagnostic guidelines for Alzheimer's disease. *Alzheimer's & dementia : the journal of the Alzheimer's Association* 2011;**7**(3):280-92
7. Jack CR, Jr., Knopman DS, Jagust WJ, et al. Tracking pathophysiological processes in Alzheimer's disease: an updated hypothetical model of dynamic biomarkers. *Lancet Neurol* 2013;**12**(2):207-16
8. Villemagne VL, Burnham S, Bourgeat P, et al. Amyloid beta deposition, neurodegeneration, and cognitive decline in sporadic Alzheimer's disease: a prospective cohort study. *Lancet Neurol* 2013;**12**(4):357-67
9. Jessen F, Amariglio RE, van Boxtel M, et al. A conceptual framework for research on subjective cognitive decline in preclinical Alzheimer's disease. *Alzheimer's & dementia : the journal of the Alzheimer's Association* 2014;**10**(6):844-52
10. Jonker C, Geerlings MI, Schmand B. Are memory complaints predictive for dementia? A review of clinical and population-based studies. *Int J Geriatr Psychiatry* 2000;**15**(11):983-91
11. Reisberg B, Gauthier S. Current evidence for subjective cognitive impairment (SCI) as the pre-mild cognitive impairment (MCI) stage of subsequently manifest Alzheimer's disease. *Int Psychogeriatr* 2008;**20**(1):1-16
12. Stewart R. Subjective cognitive impairment. *Current opinion in psychiatry* 2012;**25**(6):445-50
13. Scheef L, Spottke A, Daerr M, et al. Glucose metabolism, gray matter structure, and memory decline in subjective memory impairment. *Neurology* 2012;**79**(13):1332-9
14. van Harten AC, Visser PJ, Pijnenburg YA, et al. Cerebrospinal fluid Abeta42 is the best predictor of clinical progression in patients with subjective complaints. *Alzheimer's & dementia : the journal of the Alzheimer's Association* 2013;**9**(5):481-7
15. Molinuevo JL, Rabin LA, Amariglio R, et al. Implementation of subjective cognitive decline criteria in research studies. *Alzheimer's & dementia : the journal of the Alzheimer's Association* 2017;**13**(3):296-311
16. Rabin LA, Smart CM, Amariglio RE. Subjective Cognitive Decline in Preclinical Alzheimer's Disease. *Annu Rev Clin Psychol* 2017;**13**:369-96
17. Smart CM, Karr JE, Areshenkoff CN, et al. Non-Pharmacologic Interventions for Older Adults with Subjective Cognitive Decline: Systematic Review, Meta-Analysis, and Preliminary Recommendations. *Neuropsychol Rev* 2017;**27**(3):245-57
18. Wang S, Yang H, Zhang J, et al. Efficacy and safety assessment of acupuncture and nimodipine to treat mild cognitive impairment after cerebral infarction: a randomized controlled trial. *BMC Complement Altern Med* 2016;**16**:361
19. Deng M, Wang XF. Acupuncture for amnesic mild cognitive impairment: a meta-analysis of randomised controlled trials. *Acupuncture in medicine : journal of the British Medical Acupuncture Society* 2016;**34**(5):342-48

20. Jiang DY, Lu HW. [Effect of electroacupuncture on the cognitive function and plasma antibodies against beta-amyloid protein in aged rats with ketamine anesthesia]. *Zhongguo Zhong Xi Yi Jie He Za Zhi* 2011;**31**(11):1502-5
21. Campanella S. Why it is time to develop the use of cognitive event-related potentials in the treatment of psychiatric diseases. *Neuropsychiatr Dis Treat* 2013;**9**:1835-45
22. de Waal H, Stam CJ, Lansbergen MM, et al. The effect of souvenaid on functional brain network organisation in patients with mild Alzheimer's disease: a randomised controlled study. *PLoS One* 2014;**9**(1):e86558
23. Smart CM, Segalowitz SJ, Mulligan BP, et al. Mindfulness Training for Older Adults with Subjective Cognitive Decline: Results from a Pilot Randomized Controlled Trial. *J Alzheimers Dis* 2016;**52**(2):757-74
24. Mathotaarachchi S, Pascoal TA, Shin M, et al. Identifying incipient dementia individuals using machine learning and amyloid imaging. *Neurobiol Aging* 2017;**59**:80-90
25. Boutron I, Moher D, Altman DG, et al. Extending the CONSORT statement to randomized trials of nonpharmacologic treatment: explanation and elaboration. *Annals of internal medicine* 2008;**148**(4):295-309
26. Schulz KF, Altman DG, Moher D, et al. CONSORT 2010 statement: updated guidelines for reporting parallel group randomised trials. *Int J Surg* 2011;**9**(8):672-7
27. Jia JN ZJ, Xu J, Wei W, Chen X. The recommendation of diagnosis and treatment of cognitive impairment in Chinese elderly. *Chin J Geriatr.* 2014;**33**(8):817–825.
28. Zhao Q, Lv Y, Zhou Y, et al. Short-term delayed recall of auditory verbal learning test is equivalent to long-term delayed recall for identifying amnesic mild cognitive impairment. *PLoS One* 2012;**7**(12):e51157
29. Zhao Q, Guo Q, Li F, et al. The Shape Trail Test: application of a new variant of the Trail making test. *PLoS One* 2013;**8**(2):e57333
30. Yang L, Koyanagi A, Smith L, et al. Hand grip strength and cognitive function among elderly cancer survivors. *PLoS One* 2018;**13**(6):e0197909
31. Cui Z, Zhong S, Xu P, et al. PANDA: a pipeline toolbox for analyzing brain diffusion images. *Front Hum Neurosci* 2013;**7**:42
32. Bowie CR, Harvey PD. Administration and interpretation of the Trail Making Test. *Nat Protoc* 2006;**1**(5):2277-81
33. Chen SP, Bhattacharya J, Pershing S. Association of Vision Loss With Cognition in Older Adults. *JAMA ophthalmology* 2017;**135**(9):963-70
34. Terwindt PW, Hubers AA, Giltay EJ, et al. Screening for cognitive dysfunction in Huntington's disease with the clock drawing test. *Int J Geriatr Psychiatry* 2016;**31**(9):1013-20
35. Rivera D, Perrin PB, Stevens LF, et al. Stroop Color-Word Interference Test: Normative data for the Latin American Spanish speaking adult population. *NeuroRehabilitation* 2015;**37**(4):591-624
36. Moradi E, Hallikainen I, Hanninen T, et al. Rey's Auditory Verbal Learning Test scores can be predicted from whole brain MRI in Alzheimer's disease. *NeuroImage Clinical* 2017;**13**:415-27
37. Thomas ML, Green MF, Helleman G, et al. Modeling Deficits From Early Auditory Information Processing to Psychosocial Functioning in Schizophrenia. *JAMA psychiatry* 2017;**74**(1):37-46
38. Rami L, Mollica MA, Garcia-Sanchez C, et al. The Subjective Cognitive Decline Questionnaire (SCD-Q): a validation study. *J Alzheimers Dis* 2014;**41**(2):453-66
39. Boccia M, Vecchione F, Piccardi L, et al. Effect of Cognitive Style on Learning and Retrieval of Navigational Environments. *Front Pharmacol* 2017;**8**:496
40. Buysse DJ, Germain A, Moul DE, et al. Efficacy of brief behavioral treatment for chronic insomnia in older adults. *Archives of internal medicine* 2011;**171**(10):887-95
41. Lombardo MV, Auyeung B, Holt RJ, et al. Improving effect size estimation and statistical power with multi-echo fMRI and its impact on understanding the neural systems supporting mentalizing. *Neuroimage* 2016;**142**:55-66

- 1
- 2
- 3
- 4 42. Button KS, Ioannidis JP, Mokrysz C, et al. Power failure: why small sample size undermines the
- 5 reliability of neuroscience. *Nat Rev Neurosci* 2013;**14**(5):365-76
- 6
- 7 43. Guo Q, Thabane L, Hall G, et al. A systematic review of the reporting of sample size calculations and
- 8 corresponding data components in observational functional magnetic resonance imaging studies.
- 9 *Neuroimage* 2014;**86**:172-81
- 10
- 11 44. Hayasaka S, Peiffer AM, Hugenschmidt CE, et al. Power and sample size calculation for
- 12 neuroimaging studies by non-central random field theory. *Neuroimage* 2007;**37**(3):721-30
- 13
- 14 45. Desmond JE, Glover GH. Estimating sample size in functional MRI (fMRI) neuroimaging studies:
- 15 statistical power analyses. *J Neurosci Methods* 2002;**118**(2):115-28
- 16
- 17 46. Mumford JA, Nichols TE. Power calculation for group fMRI studies accounting for arbitrary design
- 18 and temporal autocorrelation. *Neuroimage* 2008;**39**(1):261-8
- 19
- 20 47. Barnes DE, Santos-Modesitt W, Poelke G, et al. The Mental Activity and eXercise (MAX) trial: a
- 21 randomized controlled trial to enhance cognitive function in older adults. *JAMA internal*
- 22 *medicine* 2013;**173**(9):797-804
- 23
- 24 48. Mormino EC, Betensky RA, Hedden T, et al. Amyloid and APOE epsilon4 interact to influence short-
- 25 term decline in preclinical Alzheimer disease. *Neurology* 2014;**82**(20):1760-7
- 26
- 27 49. Doraiswamy PM, Sperling RA, Johnson K, et al. Florbetapir F 18 amyloid PET and 36-month
- 28 cognitive decline: a prospective multicenter study. *Mol Psychiatry* 2014;**19**(9):1044-51
- 29
- 30 50. Rabin LA, Smart CM, Crane PK, et al. Subjective Cognitive Decline in Older Adults: An Overview
- 31 of Self-Report Measures Used Across 19 International Research Studies. *J Alzheimers Dis*
- 32 **2015**;**48 Suppl 1**:S63-86
- 33
- 34 51. Scheltens NM, Galindo-Garre F, Pijnenburg YA, et al. The identification of cognitive subtypes in
- 35 Alzheimer's disease dementia using latent class analysis. *J Neurol Neurosurg Psychiatry*
- 36 **2016**;**87**(3):235-43
- 37
- 38 52. Simon SS, Yokomizo JE, Bottino CM. Cognitive intervention in amnesic Mild Cognitive Impairment:
- 39 a systematic review. *Neurosci Biobehav Rev* 2012;**36**(4):1163-78
- 40
- 41 53. Tang Y, Zhu Z, Liu Q, et al. The efficacy of Cognitive training in patients with VAsCular Cognitive
- 42 Impairment, No dEmentia (the Cog-VACCINE study): study protocol for a randomized
- 43 controlled trial. *Trials* 2016;**17**(1):392
- 44
- 45 54. Reisberg B, Prichep L, Mosconi L, et al. The pre-mild cognitive impairment, subjective cognitive
- 46 impairment stage of Alzheimer's disease. *Alzheimer's & dementia : the journal of the Alzheimer's*
- 47 *Association* 2008;**4**(1 Suppl 1):S98-S108
- 48
- 49
- 50
- 51
- 52
- 53
- 54
- 55
- 56
- 57
- 58
- 59
- 60

1  
2  
3  
4  
5  
6  
7  
8  
9  
10  
11  
12  
13  
14  
15  
16  
17  
18  
19  
20  
21  
22  
23  
24  
25  
26  
27  
28  
29  
30  
31  
32  
33  
34  
35  
36  
37  
38  
39  
40  
41  
42  
43  
44  
45  
46  
47  
48  
49  
50  
51  
52  
53  
54  
55  
56  
57  
58  
59  
60

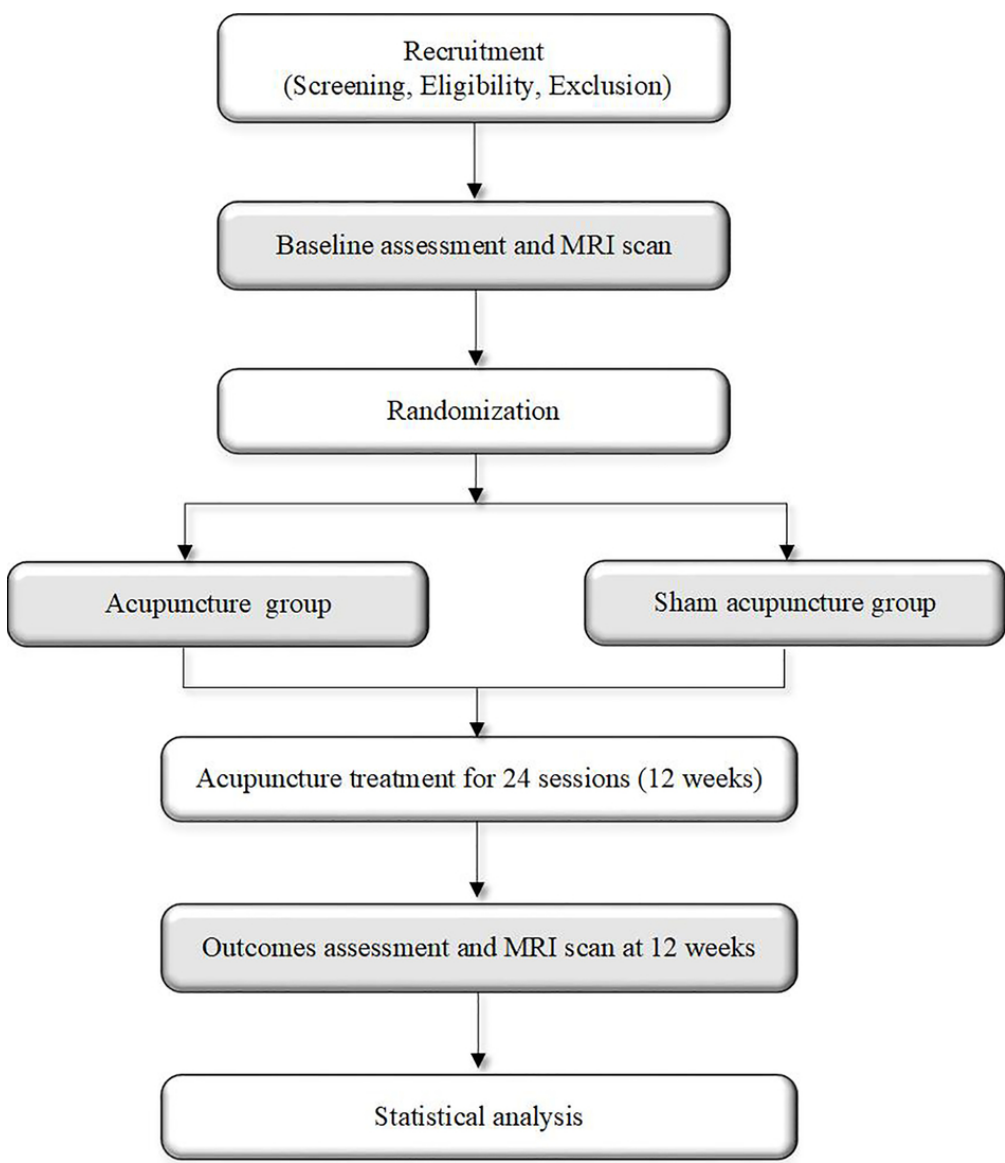

Flow chart.

80x93mm (300 x 300 DPI)



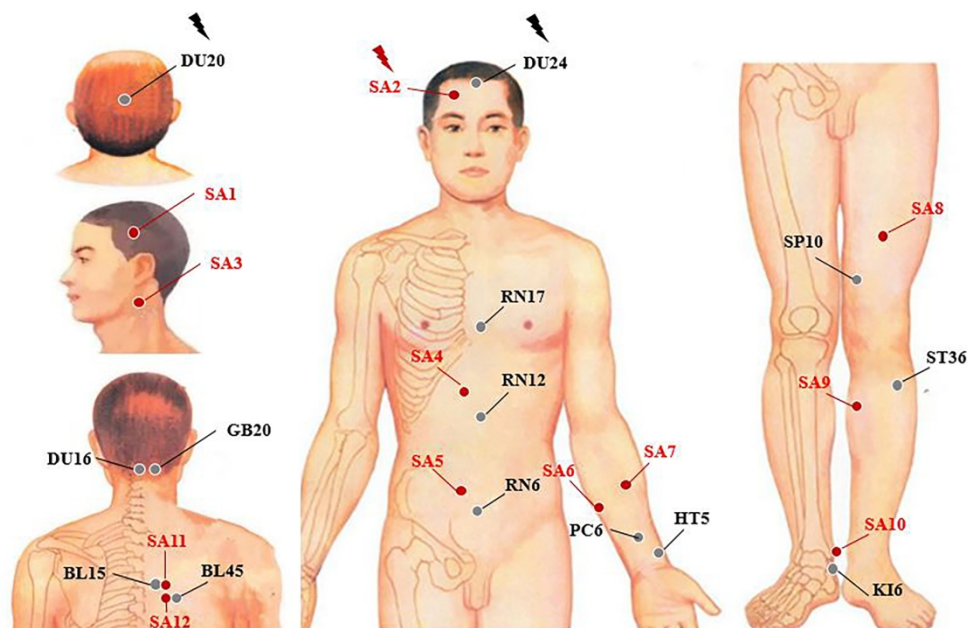

Location of acupoints or sham acupoints in the trial. Abbreviation: SA Sham acupoint, DU20 Baihui, DU24 Shengting, DU16 Fengfu, GB20 Fengchi, RN17 Danzhong, RN12 Zhongwan, RN6 Qihai, PC6 Neiguan, HT5 Tongli, SP10 Xuehai, ST36 Zusanli, KI6 Zhaohai, BL15 Xinshu, BL45 Yixi.

160x105mm (300 x 300 DPI)



1  
2  
3  
4  
5  
6  
7  
8  
9  
10  
11  
12  
13  
14  
15  
16  
17  
18  
19  
20  
21  
22  
23  
24  
25  
26  
27  
28  
29  
30  
31  
32  
33  
34  
35  
36  
37  
38  
39  
40  
41  
42  
43  
44  
45  
46  
47  
48  
49  
50  
51  
52  
53  
54  
55  
56  
57  
58  
59  
60

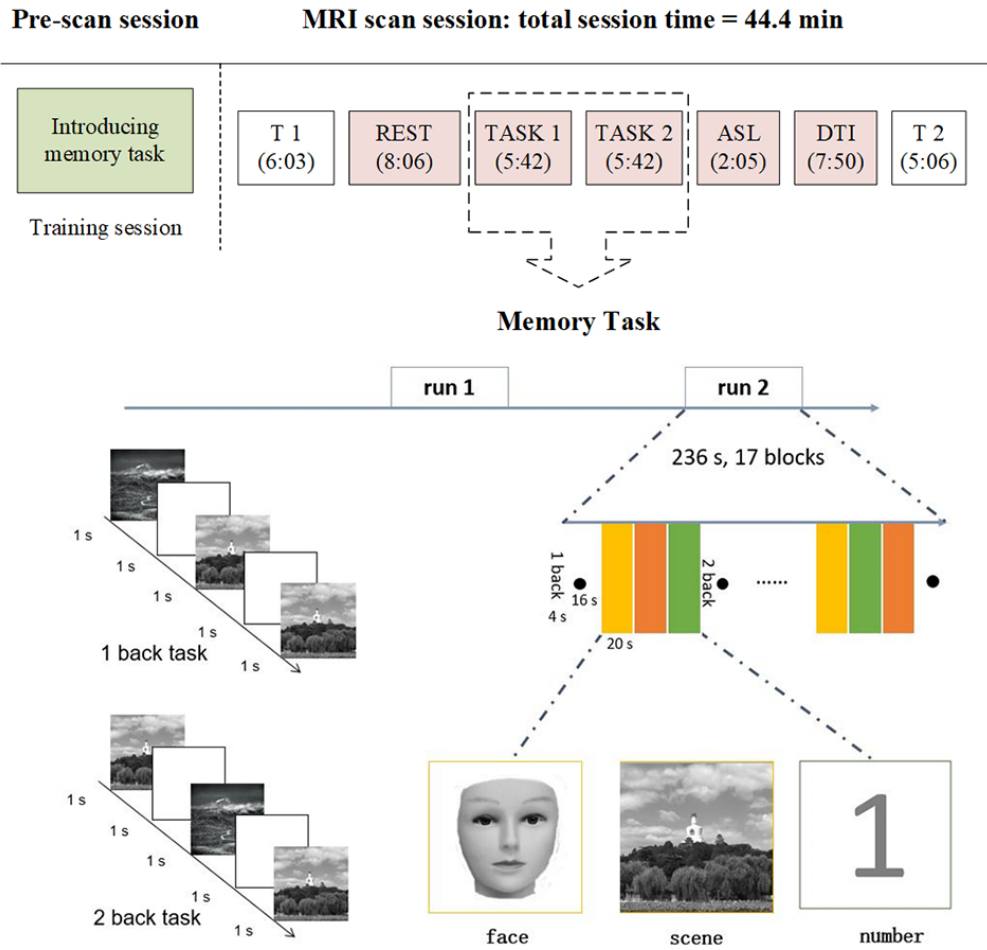

| Study period              |          |        |                 |                    |
|---------------------------|----------|--------|-----------------|--------------------|
| Items                     | Baseline |        | Treatment phase | Outcome assessment |
| Time point                | -1 week  | 0 week | 1- 12 weeks     | 13-14 weeks        |
| <b>Enrolment</b>          |          |        |                 |                    |
| Eligibility screen        | X        |        |                 |                    |
| Informed consent          | X        |        |                 |                    |
| Examination               |          | X      |                 |                    |
| Randomization             |          | X      |                 |                    |
| <b>Intervention</b>       |          |        |                 |                    |
| Acupuncture (n = 30)      |          |        | X               |                    |
| Sham acupuncture (n = 30) |          |        | X               |                    |
| <b>MRI scan</b>           |          |        |                 |                    |
| Acupuncture               |          | X      |                 | X                  |
| Sham acupuncture          |          | X      |                 | X                  |
| <b>Assessment</b>         |          |        |                 |                    |
| AFT                       |          | X      |                 | X                  |
| TMT                       |          | X      |                 | X                  |
| DSST                      |          | X      |                 | X                  |
| SCWT                      |          | X      |                 | X                  |
| AVLT                      |          | X      |                 | X                  |
| SCDQ                      |          | X      |                 | X                  |
| SBSDS                     |          | X      |                 | X                  |
| HAMD                      |          | X      |                 | X                  |
| HAMA                      |          | X      |                 | X                  |
| PSQI                      |          | X      |                 | X                  |
| <b>Safety</b>             |          |        |                 |                    |
| Laboratory test           |          | X      |                 | X                  |
| Adverse events            |          |        | X               | X                  |

Standard Protocol Items: Recommendations for Interventional Trials (SPIRIT) schedule of the trial.

80x73mm (300 x 300 DPI)

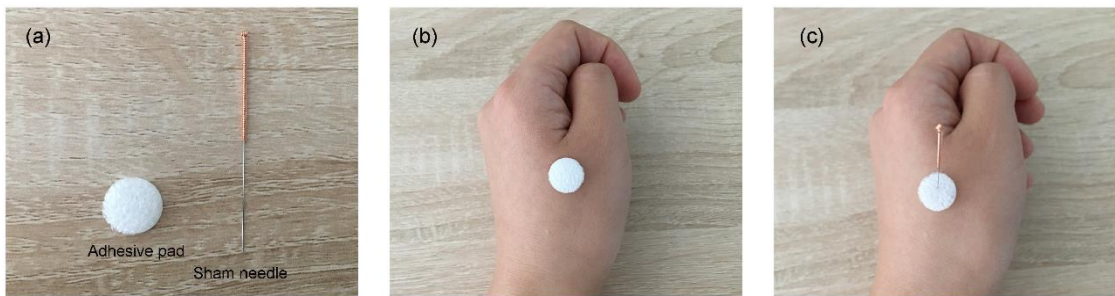

Supplement figure 1. Pictures of sham needle. (a) The adhesive pad and sham needle with a blunt tip; (b) The adhesive pad is pasted on the surface of skin; (c) The sham needle is placed on the adhesive pad.

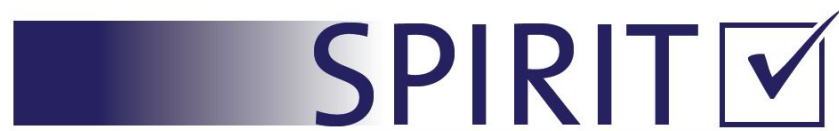

STANDARD PROTOCOL ITEMS: RECOMMENDATIONS FOR INTERVENTIONAL TRIALS

## SPIRIT 2013 Checklist: Recommended items to address in a clinical trial protocol and related documents\*

| Section/item                      | Item No | Description                                                                                                                                                                                                                                                                              | Page          |
|-----------------------------------|---------|------------------------------------------------------------------------------------------------------------------------------------------------------------------------------------------------------------------------------------------------------------------------------------------|---------------|
| <b>Administrative information</b> |         |                                                                                                                                                                                                                                                                                          |               |
| Title                             | 1       | Descriptive title identifying the study design, population, interventions, and, if applicable, trial acronym                                                                                                                                                                             | 5             |
| Trial registration                | 2a      | Trial identifier and registry name. If not yet registered, name of intended registry                                                                                                                                                                                                     | 5             |
|                                   | 2b      | All items from the World Health Organization Trial Registration Data Set                                                                                                                                                                                                                 | Not statement |
| Protocol version                  | 3       | Date and version identifier                                                                                                                                                                                                                                                              | 5             |
| Funding                           | 4       | Sources and types of financial, material, and other support                                                                                                                                                                                                                              | 16            |
| Roles and responsibilities        | 5a      | Names, affiliations, and roles of protocol contributors                                                                                                                                                                                                                                  | 5,14          |
|                                   | 5b      | Name and contact information for the trial sponsor                                                                                                                                                                                                                                       | 1             |
|                                   | 5c      | Role of study sponsor and funders, if any, in study design; collection, management, analysis, and interpretation of data; writing of the report; and the decision to submit the report for publication, including whether they will have ultimate authority over any of these activities | 14            |
|                                   | 5d      | Composition, roles, and responsibilities of the coordinating centre, steering committee, endpoint adjudication committee, data management team, and other individuals or groups overseeing the trial, if applicable (see Item 21a for data monitoring committee)                         | 11,12         |

**SPIRIT 2013 Checklist: Recommended items to address in a clinical trial protocol and related documents\*(continued)**

| Section/item                                              | Item No | Description                                                                                                                                                                                               | Page |
|-----------------------------------------------------------|---------|-----------------------------------------------------------------------------------------------------------------------------------------------------------------------------------------------------------|------|
| <b>Introduction</b>                                       |         |                                                                                                                                                                                                           |      |
| Background and rationale                                  | 6a      | Description of research question and justification for undertaking the trial, including summary of relevant studies (published and unpublished) examining benefits and harms for each intervention        | 3-4  |
|                                                           | 6b      | Explanation for choice of comparators                                                                                                                                                                     | 4    |
| Objectives                                                | 7       | Specific objectives or hypotheses                                                                                                                                                                         | 4    |
| Trial design                                              | 8       | Description of trial design including type of trial (eg, parallel group, crossover, factorial, single group), allocation ratio, and framework (eg, superiority, equivalence, noninferiority, exploratory) | 5    |
| <b>Methods: Participants, interventions, and outcomes</b> |         |                                                                                                                                                                                                           |      |
| Study setting                                             | 9       | Description of study settings (eg, community clinic, academic hospital) and list of countries where data will be collected. Reference to where list of study sites can be obtained                        | 5    |
| Eligibility criteria                                      | 10      | Inclusion and exclusion criteria for participants. If applicable, eligibility criteria for study centres and individuals who will perform the interventions (eg, surgeons, psychotherapists)              | 6    |
| Interventions                                             | 11a     | Interventions for each group with sufficient detail to allow replication, including how and when they will be administered                                                                                | 7-8  |
|                                                           | 11b     | Criteria for discontinuing or modifying allocated interventions for a given trial participant (eg, drug dose change in response to harms, participant request, or improving/worsening disease)            | 8    |

**SPIRIT 2013 Checklist: Recommended items to address in a clinical trial protocol and related documents\*(continued)**

| Section/item                                                        | Item No | Description                                                                                                                                                                                                                                                                                                                                                                    | Page               |
|---------------------------------------------------------------------|---------|--------------------------------------------------------------------------------------------------------------------------------------------------------------------------------------------------------------------------------------------------------------------------------------------------------------------------------------------------------------------------------|--------------------|
|                                                                     | 11c     | Strategies to improve adherence to intervention protocols, and any procedures for monitoring adherence (eg, drug tablet return, laboratory tests)                                                                                                                                                                                                                              | 11                 |
|                                                                     | 11d     | Relevant concomitant care and interventions that are permitted or prohibited during the trial                                                                                                                                                                                                                                                                                  | 8                  |
| Outcomes                                                            | 12      | Primary, secondary, and other outcomes, including the specific measurement variable (eg, systolic blood pressure), analysis metric (eg, change from baseline, final value, time to event), method of aggregation (eg, median, proportion), and time point for each outcome. Explanation of the clinical relevance of chosen efficacy and harm outcomes is strongly recommended | 9–11               |
| Participant timeline                                                | 13      | Time schedule of enrolment, interventions (including any run-ins and washouts), assessments, and visits for participants. A schematic diagram is highly recommended (see Figure)                                                                                                                                                                                               | Figure 1, Figure 4 |
| Sample size                                                         | 14      | Estimated number of participants needed to achieve study objectives and how it was determined, including clinical and statistical assumptions supporting any sample size calculations                                                                                                                                                                                          | 11,12              |
| Recruitment                                                         | 15      | Strategies for achieving adequate participant enrolment to reach target sample size                                                                                                                                                                                                                                                                                            | 5                  |
| <b>Methods: Assignment of interventions (for controlled trials)</b> |         |                                                                                                                                                                                                                                                                                                                                                                                |                    |
| Allocation:                                                         |         |                                                                                                                                                                                                                                                                                                                                                                                |                    |
| Sequence generation                                                 | 16a     | Method of generating the allocation sequence (eg, computer-generated random numbers), and list of any factors for stratification. To reduce predictability of a random sequence, details of any planned restriction (eg, blocking) should be provided in a separate document that is unavailable to those who enrol participants or assign interventions                       | 12                 |

**SPIRIT 2013 Checklist: Recommended items to address in a clinical trial protocol and related documents\*(continued)**

| Section/item                                              | Item No | Description                                                                                                                                                                                                                                                                                                                                                                                                  | Page           |
|-----------------------------------------------------------|---------|--------------------------------------------------------------------------------------------------------------------------------------------------------------------------------------------------------------------------------------------------------------------------------------------------------------------------------------------------------------------------------------------------------------|----------------|
| Allocation concealment mechanism                          | 16b     | Mechanism of implementing the allocation sequence (eg, central telephone; sequentially numbered, opaque, sealed envelopes), describing any steps to conceal the sequence until interventions are assigned                                                                                                                                                                                                    | 12             |
| Implementation                                            | 16c     | Who will generate the allocation sequence, who will enrol participants, and who will assign participants to interventions                                                                                                                                                                                                                                                                                    | 12             |
| Blinding (masking)                                        | 17a     | Who will be blinded after assignment to interventions (eg, trial participants, care providers, outcome assessors, data analysts), and how                                                                                                                                                                                                                                                                    | 12             |
|                                                           | 17b     | If blinded, circumstances under which unblinding is permissible, and procedure for revealing a participant's allocated intervention during the trial                                                                                                                                                                                                                                                         | Not applicable |
| <b>Methods: Data collection, management, and analysis</b> |         |                                                                                                                                                                                                                                                                                                                                                                                                              |                |
| Data collection methods                                   | 18a     | Plans for assessment and collection of outcome, baseline, and other trial data, including any related processes to promote data quality (eg, duplicate measurements, training of assessors) and a description of study instruments (eg, questionnaires, laboratory tests) along with their reliability and validity, if known. Reference to where data collection forms can be found, if not in the protocol | 12-13          |
|                                                           | 18b     | Plans to promote participant retention and complete follow-up, including list of any outcome data to be collected for participants who discontinue or deviate from intervention protocols                                                                                                                                                                                                                    | Not applicable |
| Data management                                           | 19      | Plans for data entry, coding, security, and storage, including any related processes to promote data quality (eg, double data entry; range checks for data values). Reference to where details of data management procedures can be found, if not in the protocol                                                                                                                                            | 12-13          |
| Statistical methods                                       | 20a     | Statistical methods for analysing primary and secondary outcomes. Reference to where other details of the statistical analysis plan can be found, if not in the protocol                                                                                                                                                                                                                                     | 13-14          |

**SPIRIT 2013 Checklist: Recommended items to address in a clinical trial protocol and related documents\*(continued)**



| Section/item                                                                                                              | Item No | Description                                                                                                                                                                                                                                                                                                                           | Page           |
|---------------------------------------------------------------------------------------------------------------------------|---------|---------------------------------------------------------------------------------------------------------------------------------------------------------------------------------------------------------------------------------------------------------------------------------------------------------------------------------------|----------------|
|                                                                                                                           | 20b     | Methods for any additional analyses (eg, subgroup and adjusted analyses)                                                                                                                                                                                                                                                              | 13-14          |
|                                                                                                                           | 20c     | Definition of analysis population relating to protocol non-adherence (eg, as randomised analysis), and any statistical methods to handle missing data (eg, multiple imputation)                                                                                                                                                       | 13             |
| <b>Methods: Monitoring</b>                                                                                                |         |                                                                                                                                                                                                                                                                                                                                       |                |
| Data monitoring                                                                                                           | 21a     | Composition of data monitoring committee (DMC); summary of its role and reporting structure; statement of whether it is independent from the sponsor and competing interests; and reference to where further details about its charter can be found, if not in the protocol. Alternatively, an explanation of why a DMC is not needed | Not statement  |
|                                                                                                                           | 21b     | Description of any interim analyses and stopping guidelines, including who will have access to these interim results and make the final decision to terminate the trial                                                                                                                                                               | 8              |
| Harms                                                                                                                     | 22      | Plans for collecting, assessing, reporting, and managing solicited and spontaneously reported adverse events and other unintended effects of trial interventions or trial conduct                                                                                                                                                     | 11             |
| Auditing                                                                                                                  | 23      | Frequency and procedures for auditing trial conduct, if any, and whether the process will be independent from investigators and the sponsor                                                                                                                                                                                           | Not applicable |
| <b>Ethics and dissemination</b>                                                                                           |         |                                                                                                                                                                                                                                                                                                                                       |                |
| Research ethics approval                                                                                                  | 24      | Plans for seeking research ethics committee/institutional review board (REC/IRB) approval                                                                                                                                                                                                                                             | 5              |
| Protocol amendments                                                                                                       | 25      | Plans for communicating important protocol modifications (eg, changes to eligibility criteria, outcomes, analyses) to relevant parties (eg, investigators, REC/IRBs, trial participants, trial registries, journals, regulators)                                                                                                      | 5              |
| <b>SPIRIT 2013 Checklist: Recommended items to address in a clinical trial protocol and related documents*(continued)</b> |         |                                                                                                                                                                                                                                                                                                                                       |                |

| Section/item                  | Item No | Description                                                                                                                                                                                                                                                                         | Page           |
|-------------------------------|---------|-------------------------------------------------------------------------------------------------------------------------------------------------------------------------------------------------------------------------------------------------------------------------------------|----------------|
| Consent or assent             | 26a     | Who will obtain informed consent or assent from potential trial participants or authorised surrogates, and how (see Item 32)                                                                                                                                                        | 6              |
|                               | 26b     | Additional consent provisions for collection and use of participant data and biological specimens in ancillary studies, if applicable                                                                                                                                               | 6              |
| Confidentiality               | 27      | How personal information about potential and enrolled participants will be collected, shared, and maintained in order to protect confidentiality before, during, and after the trial                                                                                                | 12-13          |
| Declaration of interests      | 28      | Financial and other competing interests for principal investigators for the overall trial and each study site                                                                                                                                                                       | 16             |
| Access to data                | 29      | Statement of who will have access to the final trial dataset, and disclosure of contractual agreements that limit such access for investigators                                                                                                                                     | 16             |
| Ancillary and post-trial care | 30      | Provisions, if any, for ancillary and post-trial care, and for compensation to those who suffer harm from trial participation                                                                                                                                                       | Not applicable |
| Dissemination policy          | 31a     | Plans for investigators and sponsor to communicate trial results to participants, healthcare professionals, the public, and other relevant groups (eg, via publication, reporting in results databases, or other data sharing arrangements), including any publication restrictions | 14             |
|                               | 31b     | Authorship eligibility guidelines and any intended use of professional writers                                                                                                                                                                                                      | Not applicable |
|                               | 31c     | Plans, if any, for granting public access to the full protocol, participant-level dataset, and statistical code                                                                                                                                                                     | Not applicable |

---

**SPIRIT 2013 Checklist: Recommended items to address in a clinical trial protocol and related documents\*(continued)**


---

| Section/item               | Item No | Description                                                                                                                                                                                    | Page                        |
|----------------------------|---------|------------------------------------------------------------------------------------------------------------------------------------------------------------------------------------------------|-----------------------------|
| <b>Appendices</b>          |         |                                                                                                                                                                                                |                             |
| Informed consent materials | 32      | Model consent form and other related documentation given to participants and authorised surrogates                                                                                             | Not offer in the manuscript |
| Biological specimens       | 33      | Plans for collection, laboratory evaluation, and storage of biological specimens for genetic or molecular analysis in the current trial and for future use in ancillary studies, if applicable | Not applicable              |

\*It is strongly recommended that this checklist be read in conjunction with the SPIRIT 2013 Explanation & Elaboration for important clarification on the items. Amendments to the protocol should be tracked and dated. The SPIRIT checklist is copyrighted by the SPIRIT Group under the Creative Commons "[Attribution-NonCommercial-NoDerivs 3.0 Unported](https://creativecommons.org/licenses/by-nc-nd/3.0/)" license.

# BMJ Open

## The efficacy and neural mechanism of acupuncture treatment in older adults with Subjective Cognitive Decline: study protocol for a randomized controlled clinical trial

|                                 |                                                                                                                                                                                                                                                                                                                                                                                                                                                                                                                                                                                                                                                                                                                                                                                                                                                                                                                                                                                                                                                                                                                                                                                                                            |
|---------------------------------|----------------------------------------------------------------------------------------------------------------------------------------------------------------------------------------------------------------------------------------------------------------------------------------------------------------------------------------------------------------------------------------------------------------------------------------------------------------------------------------------------------------------------------------------------------------------------------------------------------------------------------------------------------------------------------------------------------------------------------------------------------------------------------------------------------------------------------------------------------------------------------------------------------------------------------------------------------------------------------------------------------------------------------------------------------------------------------------------------------------------------------------------------------------------------------------------------------------------------|
| Journal:                        | <i>BMJ Open</i>                                                                                                                                                                                                                                                                                                                                                                                                                                                                                                                                                                                                                                                                                                                                                                                                                                                                                                                                                                                                                                                                                                                                                                                                            |
| Manuscript ID                   | bmjopen-2018-028317.R3                                                                                                                                                                                                                                                                                                                                                                                                                                                                                                                                                                                                                                                                                                                                                                                                                                                                                                                                                                                                                                                                                                                                                                                                     |
| Article Type:                   | Protocol                                                                                                                                                                                                                                                                                                                                                                                                                                                                                                                                                                                                                                                                                                                                                                                                                                                                                                                                                                                                                                                                                                                                                                                                                   |
| Date Submitted by the Author:   | 20-Aug-2019                                                                                                                                                                                                                                                                                                                                                                                                                                                                                                                                                                                                                                                                                                                                                                                                                                                                                                                                                                                                                                                                                                                                                                                                                |
| Complete List of Authors:       | Yan, Chao-qun; Beijing University of Chinese Medicine, Acupuncture-Moxibustion and Tuina Beijing<br>Zhou, Ping; Beijing University of Chinese Medicine, School of Acupuncture-Moxibustion and Tuina<br>Wang, Xu; Beijing University of Chinese Medicine, School of Life Sciences<br>Tu, Jian Feng; Beijing University of Chinese Medicine, School of Acupuncture-Moxibustion and Tuina<br>Hu, Shang-Qing; Beijing University of Chinese Medicine, School of Acupuncture-Moxibustion and Tuina<br>Huo, Jian-Wei; Capital Medical University, Beijing Hospital of Traditional Chinese Medicine<br>Wang, Zhong-Yan; Capital Medical University, Beijing Hospital of Traditional Chinese<br>Shi, Guangxia; Beijing University of Chinese Medicine, School of Acupuncture-Moxibustion and Tuina<br>Zhang, Ya-Nan; Capital Medical University, Beijing Hospital of Traditional Chinese Medicine<br>Li, Jun-Qiu; Capital Medical University, Beijing Hospital of Traditional Chinese Medicine<br>Wang, Jun; Beijing University of Chinese Medicine Affiliated Dongzhimen Hospital, Department of Acupuncture and moxibustion<br>Liu, Cun-Zhi; Beijing University of Chinese Medicine, School of Acupuncture-Moxibustion and Tuina |
| <b>Primary Subject Heading</b>: | Neurology                                                                                                                                                                                                                                                                                                                                                                                                                                                                                                                                                                                                                                                                                                                                                                                                                                                                                                                                                                                                                                                                                                                                                                                                                  |
| Secondary Subject Heading:      | Neurology                                                                                                                                                                                                                                                                                                                                                                                                                                                                                                                                                                                                                                                                                                                                                                                                                                                                                                                                                                                                                                                                                                                                                                                                                  |
| Keywords:                       | Subjective cognitive decline, Dementia < NEUROLOGY, Acupuncture, Sham acupuncture, Magnetic resonance imaging < RADIOLOGY & IMAGING, Clinical trial                                                                                                                                                                                                                                                                                                                                                                                                                                                                                                                                                                                                                                                                                                                                                                                                                                                                                                                                                                                                                                                                        |
|                                 |                                                                                                                                                                                                                                                                                                                                                                                                                                                                                                                                                                                                                                                                                                                                                                                                                                                                                                                                                                                                                                                                                                                                                                                                                            |

SCHOLARONE™  
Manuscripts

1  
2  
3  
4  
5  
6  
7  
8  
9  
10  
11  
12  
13  
14  
15  
16  
17  
18  
19  
20  
21  
22  
23  
24  
25  
26  
27  
28  
29  
30  
31  
32  
33  
34  
35  
36  
37  
38  
39  
40  
41  
42  
43  
44  
45  
46  
47  
48  
49  
50  
51  
52  
53  
54  
55  
56  
57  
58  
59  
60

1  
2  
3 **The efficacy and neural mechanism of acupuncture treatment in older adults with**  
4 **Subjective Cognitive Decline: study protocol for a randomized controlled clinical trial**  
5

6  
7 Chao-Qun Yan<sup>1,2</sup>; Ping Zhou<sup>1</sup>; Xu-Wang<sup>3</sup>; Jian-Feng Tu<sup>1</sup>; Shang-Qing Hu<sup>1</sup>; Jian-Wei Huo<sup>4</sup>;  
8  
9 Zhong-Yan Wang<sup>4</sup>; Guang-Xia Shi<sup>1</sup>; Ya-Nan Zhang<sup>4</sup>; Jun-Qiu Li<sup>4</sup>; Jun Wang<sup>2</sup>; Cun-Zhi  
10  
11 Liu<sup>1</sup>  
12  
13

- 14  
15 1. School of Acupuncture-Moxibustion and Tuina, Beijing University of Chinese Medicine,  
16  
17 11 Beisanhuan East Road, Chaoyang District, Beijing 100029, China  
18  
19 2. Department of Acupuncture and moxibustion, Dongzhimen hospital Beijing University of  
20  
21 Chinese Medicine, Hai Yun Cang on the 5th Zip, Dongcheng District, Beijing 100700,  
22  
23 China  
24  
25 3. School of Life Sciences, Beijing University of Chinese Medicine, 11 Beisanhuan East  
26  
27 Road, Chaoyang District, Beijing 100029, China  
28  
29 4. Department of Radiology, Beijing Hospital of Traditional Chinese Medicine affiliated to  
30  
31 Capital Medical University, 23 Meishuguanhou Street, Dongcheng District, Beijing  
32  
33 100010, China

34 \*Corresponding author at:

35  
36 School of Acupuncture-Moxibustion and Tuina, Beijing University of Chinese Medicine, 11  
37 Beisanhuan East Road, Chaoyang District, Beijing 100029, China.

38  
39 E-mail address: lcz\_tg@126.com  
40  
41  
42

43 Word count: 4588  
44  
45  
46  
47  
48  
49  
50  
51  
52  
53  
54  
55  
56  
57  
58  
59  
60

## ABSTRACT

**INTRODUCTION:** Subjective cognitive decline (SCD) refers to individuals' perceived decline in memory and/or other cognitive abilities relative to their previous level of performance, while objective neuropsychological deficits are not observed. SCD may represent a preclinical phase of Alzheimer's disease. At this very early stage of decline, intervention could slow the rate of incipient decline to prolong and preserve cognitive and functional abilities. However, there is no effective treatments recommended for individuals with SCD. Acupuncture, as a non-pharmacologic intervention, has been widely employed for patients with cognitive disorders.

**METHODS AND ANALYSIS:** The proposed study is a randomized, assessor-blinded and placebo-controlled study to investigate the efficacy and mechanism of acupuncture in SCD. Sixty patients with SCD will be randomly allocated either into an acupuncture group or a sham acupuncture group. They will receive 24 sessions of real acupuncture treatment or identical treatment sessions using a placebo needle. Global cognitive changes based on a multi-domain neuropsychological test battery will be evaluated to detect the clinical efficacy of acupuncture treatment at baseline and end of treatment. Magnetic Resonance Imaging (MRI) scans will be used to explore acupuncture related neuroplasticity changes. Correlation analyses will be performed to investigate the relationships between the changes in brain function and symptom improvement.

**ETHICS AND DISSEMINATION:** The trial was approved by the Research Ethical Committee. The results of the study will be published in a peer-reviewed academic journal and will also be disseminated electronically through conference presentations.

**TRIAL REGISTRATION NUMBER:** ClinicalTrials.gov NCT03444896. Retrospectively registered on 23 February 2018.

**Keywords:** Subjective cognitive decline; Dementia; Acupuncture; Sham acupuncture; Magnetic Resonance Imaging; Clinical trial



### Strengths and limitations of this study

Compared with the neuropsychological tests alone as efficacy evaluations, the combination with in-vivo measures of brain alterations in this study will be more sensitive in detecting acupuncture efficacy.

This study will firstly uncover the efficacy and neural mechanism of acupuncture treatment in older adults with SCD.

A multi-domain neuropsychological test battery will be employed, which can assess multiple cognitive domains including executive function, attention, visuospatial function, and language.

Sham needles and adhesive pads will be used for better patient blinding.

A potential limitation is that not a large sample size will be performed in this study.

### INTRODUCTION

Dementia is the greatest global challenge for health and social care in the 21st century [1]. Globally, about 47 million people were living with dementia in 2015, and this number is projected to triple by 2050, based on the World Alzheimer Report (2015). Alzheimer's disease (AD) is the most common form of dementia [2]. Currently, there is no effective cure for AD, and the available treatments have only moderately alleviate symptoms [3]. Therefore, prevention is essential to reduce the dementia epidemic [4 5]. The long "preclinical" phase of AD provides an opportunity for individuals to participate in treatment trials to delay or prevent cognitive decline [6-8].

Subjective cognitive decline (SCD) usually occurs in older adults, and it refers to the self-perception of cognitive decline, when individuals perform cognitive tests within normal limits and have preserved activities of daily living [9]. A review demonstrated that the prevalence of these complaints in persons aged 65 years or more varied from 25% to 50% [10]. Actually, many older adults claim cognitive decline might be regarded as hypochondriacs by professional healthy carers. However, several lines of evidence from longitudinal aging studies suggests that older adults with SCD are more likely to present AD biomarkers than their healthy peers. About 60% SCD individuals will decline to mild cognitive impairment (MCI) and AD over a 15-year

1  
2  
3 period [11 12]. People with SCD have more brain abnormalities such as hippocampal volume  
4 loss and hypometabolism compared with healthy controls [13]. Moreover, cerebrospinal amyloid  
5  $\beta$  is strongly predictive of subsequent clinical progression in patients with SCD [14]. This  
6 suggests that, for some older adults, SCD may represent a preclinical phase of AD.  
7  
8  
9

10  
11 There is still much plasticity in SCD. The patients in this stage may not progress to dementia  
12 or even revert to no cognitive impairment after effective treatment. Development of safe and  
13 effective interventions in early AD stages is important. Specific criteria to define SCD have been  
14 published [9 15], but clinical trials in SCD are in their infancy, and no pharmacological treatment  
15 or interventions is currently recommended for individuals with SCD. Despite these difficulties,  
16 the development of new treatments should be encouraged [16].  
17  
18  
19  
20

21  
22 The accumulated evidence suggests that non-pharmacologic intervention may benefit  
23 cognitive function in older adults with SCD [17]. Acupuncture, as a non-pharmacologic  
24 intervention, that has been widely used for patients with cognitive disorders. The WHO reports  
25 that acupuncture treatment can be beneficial for vascular dementia. A number of clinical studies  
26 have provided evidence that acupuncture is beneficial for the treatment of dementia or MCI [18].  
27 A systematic review supports the use of acupuncture for MCI [19]. Animal studies showed that  
28 acupuncture elicits its effects by mediation of neural plasticity in pathological conditions [20].  
29 However, the efficacy of acupuncture in patients with SCD has not be investigated. An  
30 experimental study is needed to test this hypothesis.  
31  
32  
33  
34  
35  
36  
37

38 By definition, individuals with SCD are within the normal range on clinical-  
39 neuropsychological tests. It will be difficult to detect response in this population compared with  
40 people who already have clinically manifest impairment (e.g., MCI) due to a ceiling effect. As  
41 such, neuropsychological tests in conjunction with in-vivo measures of brain function such as  
42 electroencephalo-graphy, or functional magnetic resonance imaging (fMRI), may be a more  
43 sensitive alternative to neuropsychological tests [21-23]. Brain alterations are subtle but  
44 measurable to identify individuals at risk for AD well before cognitive symptoms are manifested  
45 by using fMRI, allowing researchers to use neuroimaging to ascertain response after intervention  
46 sensitivity [24]. For better ascertaining the clinical response and unveiling the mechanism, brain  
47 alterations measured by fMRI could also be used to evaluate the efficacy of acupuncture.  
48  
49  
50  
51  
52  
53  
54  
55  
56  
57  
58  
59  
60

## OBJECTIVES

This study is a randomized controlled functional brain imaging trial with 12 weeks of treatment, aiming at: (1) evaluating the effects of acupuncture treatment on cognitive function in older adults with SCD; (2) exploring the central mechanism of the long-lasting effect of acupuncture on SCD; and (3) investigating the safety of acupuncture treatment on SCD.

## METHODS

### Design

General ethical approval was obtained from the ethics committee of the Beijing Hospital of Traditional Chinese Medicine affiliated to Capital Medical University on 29 January, 2018. The study was registered under [clinicaltrials.gov](http://clinicaltrials.gov) (NCT03444896). The CONSORT statement for non-pharmacological interventions has been used as a framework for development of the methodology for this project [25 26].

This trial is a 1:1 randomized single-blinded, and placebo-controlled study with two parallel groups involving elderly adults. The study is designed to examine the effect and neural mechanism of acupuncture treatment on cognitive function before and after a 12 weeks intervention period. As shown in Figure 1, the cognitive assessments and MRI scans will be performed at baseline and immediately after the completion of the intervention.

### Participants

The study will mainly take place in Dongcheng, Fengtai, and Shunyi District in Beijing. People with SCD will be recruited from community-dwelling population in those Districts. In order to have better insight into the trial for community residents, science popularization lectures about dementia and advertisement of the trial will be given in community service centers. The brochures and posters will also be distributed. Besides, advertisement of the trial will be shared in the official account on WeChat (China's most popular social media platform) of the Beijing Hospital of Traditional Chinese Medicine affiliated to Capital Medical University and health web site ([www.39.net](http://www.39.net)) or local newspaper for recruiting participants. Interested individuals will be screened in the clinic, community service centers or by phone using the inclusion/exclusion criteria. All those who meet the inclusion criteria will receive a study information sheet including

1  
2  
3 the design, procedure, benefits, and risks of the study. Before the study procedure started, the  
4 subjects will have to provide signed written informed consent forms. The diagnosis of SCD will  
5 be based on the published SCD research criteria proposed by the Subjective Cognitive Decline  
6 Initiative (SCD-I) [9]. In this study, the patients who answer “yes” to the question “Do you have  
7 problem in memory?” in the initial screening by phone or face-to-face interviews, will be  
8 selected to the next step. Besides, the Subjective Cognitive Decline questionnaire 9 (SCD-Q9)  
9 are further used for SCD screening. Only the patients with the SCD-Q9 score more than 5.0 will  
10 pass the screening.  
11  
12  
13  
14  
15  
16  
17

### 18 **Inclusion criteria**

- 19
- 20 •Male and female adults aged 55-75;
- 21
- 22 •Native Chinese speakers who are right-handed and have at least a primary school  
23 education;
- 24
- 25 •Self-reported persistent memory decline compared with a previous normal status within  
26 the last 5 years, which is confirmed by caregivers;
- 27
- 28
- 29 •Normal age- and education-adjusted performance on neuropsychological test including  
30 the Chinese version of Mini-Mental State Examination (MMSE) [27], the auditory  
31 verbal learning test (the short-term delayed free recall, the long-term delayed free  
32 recall, and the recognition test) [28], Trail Making Test [29], and Animal Fluency Test  
33 [30].
- 34
- 35
- 36
- 37 •No or minimal impairment in activities of daily living;
- 38
- 39

### 40 **Exclusion criteria**

- 41
- 42 •Presence of a positive neurologic history (e.g., traumatic brain injury, stroke, Parkinson's  
43 disease, multiple sclerosis);
- 44
- 45
- 46 •Treatments that would affect cognitive function (e.g., treatment for an acute psychiatric  
47 episode, therapy with memantine, rivastigmine and donepezil);
- 48
- 49 •Presence of significant psychiatric history (e.g., bipolar disorder, schizophrenia) and/or  
50 severe anxiety and depression;
- 51
- 52
- 53 •Presence of serious heart, kidney, liver, gastrointestinal, infectious, endocrine disease or  
54 cancer;
- 55
- 56
- 57
- 58
- 59

- History of alcohol or drug abuse/addiction;
- Any contraindications for MRI scans (e.g., aneurysm clip pacemaker);
- Significant visual and/or auditory impairment uncorrected by aids, and unable to perform neuropsychological evaluations;
- Currently enrolled in another research study;
- Received acupuncture treatment in the preceding month;

During the trial period, patients with SCD who meet the following criteria will be excluded from the study:

- taking medication or receiving additional treatment that is expected to affect the cognitive function (e.g., tranquilizers, antianxiolytics, hypnotics, nootropics, and cholinomimetic agents);
- withdrawal of consent for study participation because the patients does not wish to continue;
- missing more than 5 of 24 acupuncture treatment sessions;
- occurrence of a serious adverse event that the doctors consider the treatment should be termination;
- critical protocol violation such as violation of eligibility criteria.

## Intervention

Patients will receive 24 acupuncture treatment sessions over 12 weeks (twice a week). Hwato brand single-use acupuncture needles (size  $0.35 \times 25$  mm or  $0.35 \times 40$  mm), pragmatic placebo needles (size  $0.30 \times 25$  mm), and SDZ-V electroacupuncture apparatuses will be used.

For the acupuncture group (Figure 2), acupuncture needles will be placed at acupoints Baihui (DU20), Shengting (DU24), Fengfu (DU16), Fengchi(GB20), Danzhong (RN17), Zhongwan (RN12), Qihai (RN6), Neiguan (PC6), Tongli (HT5), Xuehai (SP10), Zusanli (ST36), Zhaohai (KI6), Xinshu (BL15), and Yixi (BL45). After skin disinfection in patient in the supine position, the adhesive pads are pasted on the acupoints surface except for Baihui (DU20) and Shengting (DU24). Then, the acupuncture needles will be inserted through the adhesive pads into the skin depending on the location of the needle. The location is show in Table 1. Manual acupuncture by acupuncturists using a small, equal manipulations of twirling, lifting, and thrusting will be

performed on all needles to reach deqi. The patients will feel the deqi sensation, such as soreness, numbness, distention, heaviness, and other sensations. Paired electrodes from the electroacupuncture apparatus will be attached to the needle holders of the DU20 and DU24. A dilatational wave of 2-100 Hz and a current intensity of 1 to 5 mA will be performed following by the degree of needle handle shivering, ignoring the patient's feelings. The needles will be extracted after 20 minutes for each treatment. The acupoints of DU16, BL15 and BL45 will achieve deqi in patients in a sitting position without retaining the needle.

**Table 1.** Location of Acupoints Used in the Acupuncture Group

| Acupoints        | Location                                                                                                                                                                                       | Depth       |
|------------------|------------------------------------------------------------------------------------------------------------------------------------------------------------------------------------------------|-------------|
| Baihui (DU20)    | 5 cun directly above the midpoint of the posterior hairline, or at the midpoint of the line connecting the apexes of the two auricles.                                                         | 0.2 cun     |
| Shengting (DU24) | 1.0 cun directly above the midpoint of posterior hairline.                                                                                                                                     | 0.2 cun     |
| Fengfu (DU16)    | On the back of neck, 1 cun directly above the midpoint of the posterior hairline, directly below the external occipital protuberance.                                                          | 0.5~0.1 cun |
| Fengchi(GB20)    | On the nape, below the occiput, at the level of Fengfu, in the depression between the upper portion of sternocleidomastoideus and trapezius muscle.                                            | 0.5~0.8 cun |
| Danzhong (RN17)  | On the anterior median line of the chest, at the level of the fourth intercostal space, at the midpoint between the two nipples.                                                               | 0.5 cun     |
| Zhongwan (RN12)  | On the the anterior median line of the upper abdomen, 4 cun above the umbilicus.                                                                                                               | 1~1.5 cun   |
| Qihai (RN6)      | On the anterior median line of the lower abdomen, 1.5 cun below the umbilicus.                                                                                                                 | 1~1.5 cun   |
| Neiguan (PC6)    | On the palmar aspect of forearm, 2.0 cun above the transverse crease of the wrist, between the tendons of palmaris longus and flexor carpi radialis muscle.                                    | 0.5~0.1 cun |
| Tongli (HT5),    | On the radial aspect of the tendon of the ulnar flexor muscle of the wrist, and 1 cun above the carpal crease.                                                                                 | 0.3~0.5 cun |
| Xuehai (SP10)    | When the knee is flexed, on the medial aspect of the thigh, the point is 2 cun above the mediosuperior border of the patella, on the bulgs of the medial portion of muscle quadriceps femoris. | 0.8~1 cun   |
| Zusanli (ST36)   | 3 cun directly below Dubi* and one finger-breadth lateral to the anterior border of the tibia.                                                                                                 | 0.8~1 cun   |
| Zhaohai (KI6)    | On the depression below the tip of the medial malleolus.                                                                                                                                       | 0.5~0.8 cun |
| Xinshu (BL15)    | 1.5 cun from the lower border of the spinous process of the fifth thoracic vertebra.                                                                                                           | 0.3~0.5 cun |
| Yixi (BL45)      | 3 cun from the lower border of the spinous process of the sixth thoracic vertebra.                                                                                                             | 0.5~0.8 cun |

Dubi\* location = When the knee is flexed, the point is at the knee, below the patella, in the depression from the patella ligament.

For the sham acupuncture group, sham acupoints at locations away from known acupuncture points will be used to minimize physiological effects, and the location of sham acupoints are

showed in Table 2. Patients will receive non-insertive acupuncture using the pragmatic placebo needles (Hwato brand, size 0.35 × 25 mm; supplement figure 1). As same as in the acupuncture group, the adhesive pads are initially pasted on the sham acupoints surface except for sham acupoint 1. The pragmatic placebo needles with a blunt tip will be placed on the adhesive pads. In order to minimize the physiological effect, acupuncturists will be instructed to lightly place the sham needles with a blunt tip on the adhesive pads with no manipulation. The acupuncture needle will be inserted to a shallow depth at the sham acupoint 1, which does not penetrate below the skin, and needle manipulation for *deqi*. Sham acupoint 11 and Sham acupoint 12 will be inserted with sham needles without retaining the needle. Paired electrodes will be attached the needle holders of the bilateral sham acupoint 2 but with no electricity output.

**Table 2.** Location of sham acupoints used in the sham acupuncture group.

| Sham Acupoints   | Location                                                                                      |
|------------------|-----------------------------------------------------------------------------------------------|
| Sham acupoint 1  | Midpoint of Shuaigu (GB8) and Touwei (ST8)                                                    |
| Sham acupoint 2  | Midpoint of Touwei (ST8) and Yangbai(GB14)                                                    |
| Sham acupoint 3  | Midpoint between Tianyou (SJ16) and Tianrong(SI17)                                            |
| Sham acupoint 4  | 4 cun above the umbilicus and 1 cun right of the umbilical midline                            |
| Sham acupoint 5  | 2 cun below the umbilicus and 1 cun right of the umbilical midline                            |
| Sham acupoint 6  | 1 cun outside the point 1/4 of the line between Shenmen (HT7) and Shaohai (HT3)               |
| Sham acupoint 7  | 1 cun outside the midpoint of Shenmen (HT7) and Shaohai (HT3)                                 |
| Sham acupoint 8  | 6 cun above mediosuperior border of the patella                                               |
| Sham acupoint 9  | 3 cun below the Yanglingquan (GB34) and in the middle of the gallbladder and bladder channels |
| Sham acupoint 10 | Midpoint between Jiexi (ST 41) and Qiuxu (GB40)                                               |
| Sham acupoint 11 | 2 cun from the lower border of the spinous process of the fifth thoracic vertebra             |
| Sham acupoint 12 | 2 cun from the lower border of the spinous process of the sixth thoracic vertebra             |

## MRI protocol



1  
2  
3 Patients will undergo brain MRI at baseline and after treatments. The MRI scan will be  
4 performed with a 3.0 Tesla superconductor (Skyra, Siemens, Erlangen, Germany) in the Beijing  
5 Hospital of Traditional Chinese Medicine Affiliated to Capital Medical University. The  
6 parameters of sequences employed in this study are provided by China Association of Brain  
7 Imaging (www.abimaging.org). Sagittal structural images will be acquired using a magnetization  
8 prepared rapid gradient echo (MP-RAGE) three-dimensional T1-weighted sequence with the  
9 following parameters: TR/TE = 2,530/2.98 ms, flip angle = 7°, inversion time = 1100 ms, matrix  
10 = 256 × 256, 1 mm slice thickness without slice gap. T2\*-weighted functional images will be  
11 collected using a gradient-echo echo-planar imaging sequence with the following parameters:  
12 repetition time = 3200 ms, echo time = 407 ms, flip angle = 120°.

21 Resting state-fMRI and task fMRI will be performed using an echo planar imaging (EPI)  
22 sequence with the following parameters: TR/TE = 2,000/30 ms, flip angle = 90°, matrix = 64 ×  
23 64, slice thickness = 3.5 mm with 1 mm slice gap. Diffusion tensor imaging (DTI) will use a  
24 double spin-echo echo-planar imaging sequence (TR/TE = 12,000/77 ms, flip angle = 90°,  
25 Volume interval = 12, 2 mm thick axial slices). ASL imaging of the whole brain is performed by  
26 use of a 3D pseudocontinuous ASL sequence (TR/TE = 5,000/ 15.92 ms, flip angle = 180°, Slice  
27 thickness = 3.5 mm; labeling duration, number of slices = 40).

34 All scans will be reviewed qualitatively by two radiologists to screen for possible brain  
35 lesions or structural abnormalities. DTI images will be analyzed using the PANDA package [31].  
36 Functional MRI data collected during the memory task and at rest. ASL data will be performed  
37 with the Resting-State fMRI (DPARSF) toolbox and SPM8  
38 (<http://www.fil.ion.ucl.ac.uk/spm/software/spm8>) for MATLAB. Brain activation, connectivity  
39 changes, and cerebral blood flow will be compared between two groups before and after  
40 treatment.

## 46 **Outcome measures**

### 49 *Clinical outcome assessments*

51 Global cognitive function based on a composite score will be used to evaluate the clinical  
52 efficacy of acupuncture treatment at baseline, and at the end of the 12 weeks treatment period. It  
53 will be computed by averaging z-scores from a multi-domain neuropsychological test battery that  
54  
55  
56  
57  
58  
59

1  
2  
3 includes 8 tests. Animal Fluency Test (AFT) that assess the language and executive function by  
4 examining categorical verbal fluency [30]. Trail Making Test (TMT) part A and B examines  
5 graphomotor speed, attention, and executive function [32]. Digit Symbol Substitution Test  
6 (DSST) is used to assess processing speed, attention and concentration [33]. Clock Drawing Test  
7 (CDT) can assess multiple cognitive functions, including verbal understanding, memory, abstract  
8 thinking, and executive functions [34]. Digit-Span Test (DST) is used to measure working  
9 memory's number storage capacity. Stroop color word test (SCWT) is a classic instrument for the  
10 assessment of selective attention, cognitive flexibility, cognitive inhibition, and information  
11 processing speed [35]. Auditory Verbal Learning Test (AVLT) a powerful neuropsychological  
12 test to assess episodic memory [36 37].

13  
14  
15 All patients will fill out a subjective cognitive decline questionnaire (SCDQ) [38] to assess  
16 their degree of subjective cognitive decline. The Face recognition questionnaire and Santa  
17 Barbara Sense of Direction scale [39] will be used to measure the ability for facial recognition  
18 and direction. Depressive symptoms, and sleep quality will be measured by Geriatric Depression  
19 Scale and Pittsburgh Sleep Quality Index (PSQI) [40].

### 20 21 22 *Neuroplasticity assessments*

23  
24  
25 In this study, neuroplasticity changes between the two groups will be measured by fMRI.  
26 Before the acupuncture treatment, patients will complete the fMRI scan within 3 days. They will  
27 also have the follow up fMRI scan within 3 days after the completion of their intervention  
28 (Figure 3). Brain activity and functional connectivity will be assessed under a resting state and a  
29 memory task. Group difference on cerebral blood flow and white matter integrity will be  
30 assessed by means of arterial spin labeling (ASL) or diffusion tensor imaging (DTI).

31  
32  
33 *Memory task.* The patients will be trained before entering the fMRI scanner. They will  
34 complete a practice version of the memory task paradigm in computer. This practice mock test  
35 will show the correct number, and they need to perform the tasks with an accuracy criterion of  
36 80% to ensure that the patients understand how to do the memory task in the scanner. A blocked  
37 periodic design that incorporated alternating 1-back, and 2-back tasks will be used. Patients will  
38 view facial pictures, scene pictures or single digits (0–9, black on a white background). In the 1-  
39 back task, the patients are required to press a button when a facial picture, scene picture or digit  
40 appears that is the same as the one before. In the 2-back task, the patients are asked to press a  
41  
42  
43  
44  
45  
46  
47  
48  
49  
50  
51  
52  
53  
54  
55  
56  
57  
58  
59  
60

1  
2  
3 response button if the current facial picture, scene picture or digit is the same as the one which  
4 was presented two trials before. The stimuli consist of 17 blocks for 236 seconds and are  
5 presented on a computer using MATLAB 8.6 (Mathworks, Inc., Natick, MA, USA) for 1 second,  
6 with an inter-stimulus interval of 1 second. Trial types within blocks are presented in  
7 pseudorandomized order.  
8  
9

10  
11  
12 Once in the scanner, anatomical and functional scans will be performed. During the scanning,  
13 all patients are asked to lie quietly in the scanner with their eyes open, trying to avoid thinking  
14 systematically, and moving as little as possible. In resting state fMRI scanning, the patients are  
15 instructed to view centrally placed fixation cross (+), and try to not think of anything. Two  
16 memory task runs will be conducted after T1 and resting state scans, then following by ASL, and  
17 DTI scans.  
18  
19  
20  
21  
22

### 23 **Apolipoprotein E genotyping**

24  
25  
26 A TIANamp Blood DNA Kit (TIANGEN BIOTECH, Beijing, China) will be used to isolate  
27 High-molecular-weight DNA. The genotype of APOE will be detected by APOE Gene Detection  
28 Kit (Wuhan YZY Biopharma, Wuhan, China) with E2 and E4 reaction liquid. Genomic DNA  
29 and reaction liquid will be placed on a 7500 HT Fast Real-Time PCR (Applied Biosystems, Foster  
30 City, USA) with the following conditions: Uracil-N-Glycosylase treatment at 37 °C for 10  
31 minutes, denaturation at 95 °C for 5 minutes, followed by 40 cycles at 95 °C for 15s and  
32 annealing at 60 °C for 60s (acquiring the fluorescence signal in this step). According to the  
33 amplification plot, the genotype of APOE will be determined.  
34  
35  
36  
37  
38  
39

### 40 **Safety and Monitoring**

41  
42  
43 Treatment-related adverse events, including hematoma, bleeding, subcutaneous hemorrhage,  
44 serious pain, local infection and fatigue will be compared among patients in the acupuncture  
45 group and the sham acupuncture group, and will be documented at each treatment session. In  
46 order to ensure consistency, the neuropsychological tests and other assessment scales will be  
47 performed by the same researcher at baseline and the end of treatment. A professional staff will  
48 check the imaging data for quality and protocol conformity after each scanning session. Patients  
49 will undergo blood routine test and blood biochemical tests including blood glucose,  
50 homocysteine, total cholesterol, etc. before randomization and at the end of treatment.  
51  
52  
53  
54  
55  
56  
57  
58  
59

## Sample size and blinding

Task fMRI studies characteristically include small sample size [41] and thus have a low statistical power. The statistically underpowered study by definition means that a study will have less of a chance for detecting significant effects [42]. Therefore, power-based sample size will be calculated prior to fMRI data collection [43]. Fortunately, approaches for sample size calculations in studies using functional magnetic resonance imaging have been developed.

By using the non-central random field theory, Hayasaka et al estimated that at least 12 subjects would be required to detect signals in either of the auditory cortices with at least 80% power [44]. They also found that approximately 13 subjects would be required to detect signals in the auditory cortices with 80% power, when generated a sample size map based on the mock pilot analysis [44]. Adopting a simulation-based method to calculate statistical power for group-level fMRI studies, Desmond and Glover found a minimum of 12 subjects are required to achieve 80% power at  $\alpha = 0.05$  at the single voxel level [45]. For a more realistic thresholds, twice as many subjects are recommended to maintain this level of power after correcting for multiple comparisons. For a stricter alpha of 0.000002, approximately 25 subjects are needed. Mumford and Nichol recommended 20 subjects and a Type I error of  $\alpha = 0.005$  should probably be used, and this power calculation is based on a non-central T or F distribution [46]. We used the largest sample size of 25 for each group with an estimated dropout rate and loss of data due to head motion, then we planned to enroll 60 participants in the two groups.

Eligible patients will be randomly assigned into either the acupuncture or sham acupuncture group after signed written informed consent forms via a randomization digital table with a 1:1 ratio. Blocked randomization with a block size of 6 will be employed to ensure balance within the two groups. The randomization sequence will be generated by a third-party professional statistician using computer-generated randomization the digital table by using SAS 9.2 (SAS Institute Inc., Cary, NC, USA). The randomization list will be stored by a noninvolved investigator and out of reach and sight of the involved investigators. The allocation schedule using a telephone randomization procedure. The randomization list was restricted to this research coordinator and was concealed from other study personnel. The patients, outcome assessors, and statisticians will be blinded to treatment allocation. Patients are told that they will receive one of two effective interventions randomized after enrolment. During the acupuncture treatment, the

1  
2  
3 adhesive pads are pasted on the acupoints or sham acupoints after skin disinfection. The true or  
4 sham needles with a blunt tip will place in the adhesive pads. Patients in different groups will be  
5 separated into cubicles to refrain from communication.  
6  
7

## 8 9 **Data collection and management**

10  
11 At baseline, information of patients about age, sex, education, dominant hand, and medical  
12 history will be collected (Figure 4). For all patients that met the inclusion criteria, the  
13 neuropsychological tests will be performed before and after treatment in a quiet room by  
14 evaluators, who have been trained by the organization of Alliance of early AD. All of the MRI  
15 scans will be conducted in the same machine, and the operators have been technically trained by  
16 a professional engineer from the China Association of Brain Imaging. Blood samples will be  
17 collected in the morning and handled by 2 persons. After each treatment session, adverse event  
18 will be recorded in participant's diary card by acupuncturists.  
19  
20  
21  
22  
23  
24  
25

26 A case report form (CRF) will be used to collect the clinical data for each patient, labeled by  
27 unique numeric identifier and recorded by a trained graduate student. The data in the CRF will  
28 be verified for accuracy, missing data, and data consistency by a clinical research associate.  
29 Paper-based research data will be entered into an EpiData electronic database. For reducing  
30 errors in data entry, data will be entered independently twice by two independent people, and  
31 value pairs will then be compared for discordances, followed by resolution of discordances by  
32 referral to the original data source. The EpiData will export data in a Microsoft Excel  
33 spreadsheet formats. The data will be entered in an electronic Statistical Package SPSS software  
34 (SPSS 12.0 KO for Windows ©) for ease of statistical analysis.  
35  
36  
37  
38  
39  
40  
41

## 42 **Statistical analysis**

### 43 *Clinical data analysis*

44  
45 In this study, intent-to-treat analysis and per protocol analysis will be used. In this study, the  
46 intent-to-treat population consisted of all randomized patients who received at least one dose of  
47 treatment and had a complete baseline assessment. The per protocol population defined as all  
48 randomized patients who did not discontinue prematurely, completed the 12 weeks treatment and  
49 had MRI scans before and after treatment. Observation of histograms and normal probability  
50 plots and a Shapiro–Wilk test will be performed to determine the data whether followed a normal  
51  
52  
53  
54  
55  
56  
57  
58  
59  
60

1  
2  
3 distribution. Distributed data will be described using means, standard deviations, and 95%  
4 confidence intervals (CIs). Clinical outcome analyses will be done with SPSS software (SPSS  
5 22.0 KO for Windows ©), with a significance level of 0.05, and all hypothesis tests are two-  
6  
7 tailed.  
8  
9

10  
11 Baseline demographic characteristics between the two groups will be analyzed with  $\chi^2$  test or  
12 Fisher's exact test for categorical measures, and with the T-test or Wilcoxon rank-sum test for  
13 continuous measures. The clinical outcome of the global cognitive function based on composite  
14 scores will be compared between the acupuncture group and sham acupuncture group. The  
15 composite scores will be created by converting all individual cognitive scores to standardized z  
16 scores. As previously described [47], we computed z-scores by subtracting the baseline group  
17 mean and dividing the baseline group standard deviation, and then averaging the standardized z  
18 scores across all tests. The general linear model will be used to examine change in cognitive  
19 scores. For the other outcomes, if it agreed with normal distribution, an independent T-test will  
20 used. Otherwise, for abnormal distribution, the data will be analyzed with Wilcoxon's test. The  
21 statisticians who analyzed the data are blinded to the test settings.  
22  
23  
24  
25  
26  
27  
28  
29

### 30 ***MRI data analysis***

31  
32  
33 For imaging data will be analyzed using DPABI toolkit performing on MATLAB 8.6  
34 (Mathworks, Inc., Natick, MA, USA) to detect any changes in brain function due to acupuncture  
35 treatment. After data preprocessing, some graph theory-based or data driven approaches will be  
36 performed to investigate neuroplasticity between the two groups, such as regional homogeneity,  
37 amplitude of the low-frequency fluctuation, and voxel-wise degree centrality. A two-sample t-  
38 test will be conducted to investigate the differences in brain regions between the acupuncture  
39 group and the sham acupuncture group in the DPARSF software. Multiple comparisons will be  
40 used in order to better control for a highly inflated false positivity rate. Pearson's correlation  
41 analysis will be performed to examine the association between the fMRI image data and clinical  
42 variables.  
43  
44  
45  
46  
47  
48  
49

### 50 **Ethics and dissemination**

51  
52  
53 General ethical approval has been obtained from the ethics committee of the Beijing Hospital  
54 of Traditional Chinese Medicine affiliated to Capital Medical University on 29 January, 2018  
55  
56  
57  
58  
59



1  
2  
3 (Ref: 2017BL-061-02). The study was registered under clinicaltrials.gov (NCT03444896). The  
4 CONSORT statement and the CONSORT statement for non-pharmacological interventions have  
5 been used as a framework for development of the methodology for this project [24 25].  
6  
7

8  
9 If any modifications or decision are made, amendments will be reviewed and approved by the  
10 ethics committee, and new protocols would be uploaded to Clinicaltrials.gov. The results of the  
11 study will be published in a peer-reviewed academic journal and will also be disseminated  
12 electronically through conference presentations.  
13  
14  
15

### 16 **Patient and public involvement**

17  
18  
19 Currently, this trial is at the recruitment phase with no patient involved in. The participants  
20 will be able to view the study results via social media.  
21  
22

### 23 **DISCUSSION**

24  
25 SCD, may be the initial phase of AD, and could serve as a window of opportunity for  
26 interventions at an early disease stage [23]. This study is planned as a randomized, assessor-  
27 blinded, placebo-controlled trial to evaluate the efficacy and central mechanism of acupuncture  
28 treatment on SCD compared with a sham acupuncture group. To our knowledge, this trial is also  
29 the first study to investigate the effect of acupuncture in SCD patients.  
30  
31  
32  
33

34  
35 This study has several strengths. First, we will assess patients with SCD on multiple levels,  
36 including multi-domain neuropsychological tests, functional brain alterations, cerebrovascular  
37 risk factors, and AOPE genotyping. This multi-domain assessment will be used to identify  
38 possible biomarkers involved in the effects of acupuncture in SCD.  
39  
40  
41

42  
43 Second, the neuropsychological assessment in the present study is a multi-domain  
44 neuropsychological test battery that included eight tests, which can assess multiple cognitive  
45 domains including executive functions, attention, visuospatial functioning, and language.  
46 Memory decline associated with AD risk factors [48 49], and then most instruments were used  
47 previously to measure SCD focus on memory [50]. However, it might be too restrictive to limit  
48 the SCD assessment to memory, in particular for atypical forms of AD [9 51]. In this study,  
49 multi-domain cognitive function will be assessed.  
50  
51  
52  
53  
54  
55  
56  
57  
58  
59  
60



1  
2  
3 Additionally, functional brain alterations will be used as outcome measures. Compared with  
4 the neuropsychological tests alone, the combination of in-vivo measures of brain alterations in  
5 this study will be more sensitive in detecting acupuncture efficacy. A smaller training effect and  
6 ceiling effect may be found when using MRI [52]. Furthermore, it can be used as a tool to  
7 understand the mechanism of the acupuncture's effects. Functional MRI can identify whether  
8 neural efficiency is improved or the brain connectome is reorganized to achieve cognitive  
9 enhancement [53].  
10  
11  
12  
13  
14  
15

16 A potential limitation is that the patients in this study will be recruited from the community.  
17 Considering the research environment, individuals recruited from a memory clinic may have a  
18 higher probability of having preclinical AD. They had specific concerns sufficient to prompt a  
19 medical visit [15]. However, community based studies have shown some predictive value of  
20 SCD for cognitive decline and dementia [10 54]. Another potential limitation of our study is that  
21 it will not include a large sample size, and this may lead to the need for a future study. The main  
22 feature of our study is to systemically investigate and analyze the central mechanisms of  
23 acupuncture treatment in patients with SCD. The findings may provide deeper insight into the  
24 benefits and mechanisms of acupuncture for patients with SCD.  
25  
26  
27  
28  
29  
30  
31

### 32 **Trial status**

33  
34 This trial is currently in the recruitment phase.  
35  
36  
37  
38  
39  
40  
41

### 42 **Figure Legends**

43  
44 **Figure 1.** Flow chart.  
45

46 **Figure 2.** Location of acupoints or sham acupoints in the trial. Abbreviation: SA Sham acupoint, DU20  
47 Baihui, DU24 Shengting, DU16 Fengfu, GB20 Fengchi, RN17 Danzhong, RN12 Zhongwan, RN6 Qihai,  
48 PC6 Neiguan, HT5 Tongli, SP10 Xuehai, ST36 Zusanli, KI6 Zhaohai , BL15 Xinshu, BL45 Yixi.  
49  
50

51  
52 **Figure 3.** Magnetic resonance imaging experimental paradigm and an Illustrative diagram of the  
53 memory task.  
54  
55  
56  
57  
58  
59  
60

1  
2  
3 **Figure 4.** Standard Protocol Items: Recommendations for Interventional Trials (SPIRIT) and the  
4 schedule of the trial.  
5

6  
7 **Supplement figure 1.** (a) The adhesive pads and sham needles with a blunt tip; (b) The adhesive  
8 pad was pasted on the surface of skin; (c) The sham needle was placed on the adhesive pad.  
9

## 10 11 **Footnotes**

12  
13  
14 **List of abbreviations** SCD: Subjective Cognitive Decline; AD: Alzheimer's disease; MCI:  
15 Mild Cognitive Impairment; APOE: apolipoprotein E; MRI: Magnetic Resonance Imaging; AFT:  
16 Animal Fluency Test; TMT: Trail Making Test; DSST: Digit Symbol Substitution Test; SCWT:  
17 Stroop Color Word Test; AVLT: Auditory Verbal Learning Test; SCDQ: Subjective Cognitive  
18 Decline Questionnaire; SBSDS: Santa Barbara Sense of Direction Scale; HAMD: Hamilton  
19 Rating Scale for Depression; HAMA: Hamilton Rating Scale for Anxiety; PSQI: Pittsburgh  
20 Sleep Quality Index.  
21

22  
23 **Contributors** Conceived and designed the experiments: CZL and JWH. Performed the  
24 experiments: PZ, ZYW, SQH, CQY, GXS, JQL, YNZ. Analyzed the data: XW, JW, JFT. Wrote  
25 the paper: CQY, XW and CZL. All authors approved the final manuscript.  
26

27 **Funding** This work was supported by the National Natural Science Foundation of China (Grant  
28 No. 81674055) and supported by the Fundamental Research Funds for the Central Universities  
29 (2017-JYB-JS-018). We declared the study was only supported by the governmental funding,  
30 and the study did not receive funding/assistance from a commercial organization.  
31

32 **Consent for publication** Not applicable.

33 **Patient consent for publication** Not required.

34  
35 **Ethics approval** Ethics approval The Research Ethical Committee of Beijing Hospital of  
36 Traditional Chinese Medicine Affiliated to Capital Medical University approved the trial.  
37

38 **Provenance and peer review** Not commissioned; externally peer reviewed.

39  
40 **Data sharing statement** Not applicable. This is a study protocol and no unpublished data are  
41 available. Further information unaddressed can be obtained from the corresponding author.  
42

43 **Competing interests** The authors declare that they have no competing interests.  
44  
45  
46  
47  
48  
49  
50  
51  
52  
53  
54  
55  
56  
57  
58  
59  
60

## REFERENCES

1. Livingston G, Sommerlad A, Orgeta V, et al. Dementia prevention, intervention, and care. *Lancet* 2017;**390**(10113):2673-734
2. Delbeuck X, Van der Linden M, Collette F. Alzheimer's disease as a disconnection syndrome? *Neuropsychol Rev* 2003;**13**(2):79-92
3. Ong SS, Doraiswamy PM, Lad EM. Controversies and Future Directions of Ocular Biomarkers in Alzheimer Disease. *JAMA neurology* 2018
4. WHO. Dementia: a public health priority. Geneva: World Health Organization—Alzheimer's Disease International hwwimhpdrea.
5. G8 dementia summit declaration. <https://www.gov.uk/government/publications/g8-dementia-summit-agreements>.
6. Sperling RA, Aisen PS, Beckett LA, et al. Toward defining the preclinical stages of Alzheimer's disease: recommendations from the National Institute on Aging-Alzheimer's Association workgroups on diagnostic guidelines for Alzheimer's disease. *Alzheimer's & dementia : the journal of the Alzheimer's Association* 2011;**7**(3):280-92
7. Jack CR, Jr., Knopman DS, Jagust WJ, et al. Tracking pathophysiological processes in Alzheimer's disease: an updated hypothetical model of dynamic biomarkers. *Lancet Neurol* 2013;**12**(2):207-16
8. Villemagne VL, Burnham S, Bourgeat P, et al. Amyloid beta deposition, neurodegeneration, and cognitive decline in sporadic Alzheimer's disease: a prospective cohort study. *Lancet Neurol* 2013;**12**(4):357-67
9. Jessen F, Amariglio RE, van Boxtel M, et al. A conceptual framework for research on subjective cognitive decline in preclinical Alzheimer's disease. *Alzheimer's & dementia : the journal of the Alzheimer's Association* 2014;**10**(6):844-52
10. Jonker C, Geerlings MI, Schmand B. Are memory complaints predictive for dementia? A review of clinical and population-based studies. *Int J Geriatr Psychiatry* 2000;**15**(11):983-91
11. Reisberg B, Gauthier S. Current evidence for subjective cognitive impairment (SCI) as the pre-mild cognitive impairment (MCI) stage of subsequently manifest Alzheimer's disease. *Int Psychogeriatr* 2008;**20**(1):1-16
12. Stewart R. Subjective cognitive impairment. *Current opinion in psychiatry* 2012;**25**(6):445-50
13. Scheef L, Spottke A, Daerr M, et al. Glucose metabolism, gray matter structure, and memory decline in subjective memory impairment. *Neurology* 2012;**79**(13):1332-9
14. van Harten AC, Visser PJ, Pijnenburg YA, et al. Cerebrospinal fluid Abeta42 is the best predictor of clinical progression in patients with subjective complaints. *Alzheimer's & dementia : the journal of the Alzheimer's Association* 2013;**9**(5):481-7
15. Molinuevo JL, Rabin LA, Amariglio R, et al. Implementation of subjective cognitive decline criteria in research studies. *Alzheimer's & dementia : the journal of the Alzheimer's Association* 2017;**13**(3):296-311
16. Rabin LA, Smart CM, Amariglio RE. Subjective Cognitive Decline in Preclinical Alzheimer's Disease. *Annu Rev Clin Psychol* 2017;**13**:369-96
17. Smart CM, Karr JE, Areshenkoff CN, et al. Non-Pharmacologic Interventions for Older Adults with Subjective Cognitive Decline: Systematic Review, Meta-Analysis, and Preliminary Recommendations. *Neuropsychol Rev* 2017;**27**(3):245-57
18. Wang S, Yang H, Zhang J, et al. Efficacy and safety assessment of acupuncture and nimodipine to treat mild cognitive impairment after cerebral infarction: a randomized controlled trial. *BMC Complement Altern Med* 2016;**16**:361
19. Deng M, Wang XF. Acupuncture for amnesic mild cognitive impairment: a meta-analysis of randomised controlled trials. *Acupuncture in medicine : journal of the British Medical Acupuncture Society* 2016;**34**(5):342-48

20. Jiang DY, Lu HW. [Effect of electroacupuncture on the cognitive function and plasma antibodies against beta-amyloid protein in aged rats with ketamine anesthesia]. *Zhongguo Zhong Xi Yi Jie He Za Zhi* 2011;**31**(11):1502-5
21. Campanella S. Why it is time to develop the use of cognitive event-related potentials in the treatment of psychiatric diseases. *Neuropsychiatr Dis Treat* 2013;**9**:1835-45
22. de Waal H, Stam CJ, Lansbergen MM, et al. The effect of souvenaid on functional brain network organisation in patients with mild Alzheimer's disease: a randomised controlled study. *PLoS One* 2014;**9**(1):e86558
23. Smart CM, Segalowitz SJ, Mulligan BP, et al. Mindfulness Training for Older Adults with Subjective Cognitive Decline: Results from a Pilot Randomized Controlled Trial. *J Alzheimers Dis* 2016;**52**(2):757-74
24. Mathotaarachchi S, Pascoal TA, Shin M, et al. Identifying incipient dementia individuals using machine learning and amyloid imaging. *Neurobiol Aging* 2017;**59**:80-90
25. Boutron I, Moher D, Altman DG, et al. Extending the CONSORT statement to randomized trials of nonpharmacologic treatment: explanation and elaboration. *Annals of internal medicine* 2008;**148**(4):295-309
26. Schulz KF, Altman DG, Moher D, et al. CONSORT 2010 statement: updated guidelines for reporting parallel group randomised trials. *Int J Surg* 2011;**9**(8):672-7
27. Jia JN ZJ, Xu J, Wei W, Chen X. The recommendation of diagnosis and treatment of cognitive impairment in Chinese elderly. *Chin J Geriatr.* 2014;**33**(8):817–825.
28. Zhao Q, Lv Y, Zhou Y, et al. Short-term delayed recall of auditory verbal learning test is equivalent to long-term delayed recall for identifying amnesic mild cognitive impairment. *PLoS One* 2012;**7**(12):e51157
29. Zhao Q, Guo Q, Li F, et al. The Shape Trail Test: application of a new variant of the Trail making test. *PLoS One* 2013;**8**(2):e57333
30. Yang L, Koyanagi A, Smith L, et al. Hand grip strength and cognitive function among elderly cancer survivors. *PLoS One* 2018;**13**(6):e0197909
31. Cui Z, Zhong S, Xu P, et al. PANDA: a pipeline toolbox for analyzing brain diffusion images. *Front Hum Neurosci* 2013;**7**:42
32. Bowie CR, Harvey PD. Administration and interpretation of the Trail Making Test. *Nat Protoc* 2006;**1**(5):2277-81
33. Chen SP, Bhattacharya J, Pershing S. Association of Vision Loss With Cognition in Older Adults. *JAMA ophthalmology* 2017;**135**(9):963-70
34. Terwindt PW, Hubers AA, Giltay EJ, et al. Screening for cognitive dysfunction in Huntington's disease with the clock drawing test. *Int J Geriatr Psychiatry* 2016;**31**(9):1013-20
35. Rivera D, Perrin PB, Stevens LF, et al. Stroop Color-Word Interference Test: Normative data for the Latin American Spanish speaking adult population. *NeuroRehabilitation* 2015;**37**(4):591-624
36. Moradi E, Hallikainen I, Hanninen T, et al. Rey's Auditory Verbal Learning Test scores can be predicted from whole brain MRI in Alzheimer's disease. *NeuroImage Clinical* 2017;**13**:415-27
37. Thomas ML, Green MF, Helleman G, et al. Modeling Deficits From Early Auditory Information Processing to Psychosocial Functioning in Schizophrenia. *JAMA psychiatry* 2017;**74**(1):37-46
38. Rami L, Mollica MA, Garcia-Sanchez C, et al. The Subjective Cognitive Decline Questionnaire (SCD-Q): a validation study. *J Alzheimers Dis* 2014;**41**(2):453-66
39. Boccia M, Vecchione F, Piccardi L, et al. Effect of Cognitive Style on Learning and Retrieval of Navigational Environments. *Front Pharmacol* 2017;**8**:496
40. Buysse DJ, Germain A, Moul DE, et al. Efficacy of brief behavioral treatment for chronic insomnia in older adults. *Archives of internal medicine* 2011;**171**(10):887-95
41. Lombardo MV, Auyeung B, Holt RJ, et al. Improving effect size estimation and statistical power with multi-echo fMRI and its impact on understanding the neural systems supporting mentalizing. *Neuroimage* 2016;**142**:55-66

- 1
- 2
- 3
- 4 42. Button KS, Ioannidis JP, Mokrysz C, et al. Power failure: why small sample size undermines the
- 5 reliability of neuroscience. *Nat Rev Neurosci* 2013;**14**(5):365-76
- 6
- 7 43. Guo Q, Thabane L, Hall G, et al. A systematic review of the reporting of sample size calculations and
- 8 corresponding data components in observational functional magnetic resonance imaging studies.
- 9 *Neuroimage* 2014;**86**:172-81
- 10
- 11 44. Hayasaka S, Peiffer AM, Hugenschmidt CE, et al. Power and sample size calculation for
- 12 neuroimaging studies by non-central random field theory. *Neuroimage* 2007;**37**(3):721-30
- 13
- 14 45. Desmond JE, Glover GH. Estimating sample size in functional MRI (fMRI) neuroimaging studies:
- 15 statistical power analyses. *J Neurosci Methods* 2002;**118**(2):115-28
- 16
- 17 46. Mumford JA, Nichols TE. Power calculation for group fMRI studies accounting for arbitrary design
- 18 and temporal autocorrelation. *Neuroimage* 2008;**39**(1):261-8
- 19
- 20 47. Barnes DE, Santos-Modesitt W, Poelke G, et al. The Mental Activity and eXercise (MAX) trial: a
- 21 randomized controlled trial to enhance cognitive function in older adults. *JAMA internal*
- 22 *medicine* 2013;**173**(9):797-804
- 23
- 24 48. Mormino EC, Betensky RA, Hedden T, et al. Amyloid and APOE epsilon4 interact to influence short-
- 25 term decline in preclinical Alzheimer disease. *Neurology* 2014;**82**(20):1760-7
- 26
- 27 49. Doraiswamy PM, Sperling RA, Johnson K, et al. Florbetapir F 18 amyloid PET and 36-month
- 28 cognitive decline: a prospective multicenter study. *Mol Psychiatry* 2014;**19**(9):1044-51
- 29
- 30 50. Rabin LA, Smart CM, Crane PK, et al. Subjective Cognitive Decline in Older Adults: An Overview
- 31 of Self-Report Measures Used Across 19 International Research Studies. *J Alzheimers Dis*
- 32 **2015**;**48 Suppl 1**:S63-86
- 33
- 34 51. Scheltens NM, Galindo-Garre F, Pijnenburg YA, et al. The identification of cognitive subtypes in
- 35 Alzheimer's disease dementia using latent class analysis. *J Neurol Neurosurg Psychiatry*
- 36 **2016**;**87**(3):235-43
- 37
- 38 52. Simon SS, Yokomizo JE, Bottino CM. Cognitive intervention in amnesic Mild Cognitive Impairment:
- 39 a systematic review. *Neurosci Biobehav Rev* 2012;**36**(4):1163-78
- 40
- 41 53. Tang Y, Zhu Z, Liu Q, et al. The efficacy of Cognitive training in patients with VAsCular Cognitive
- 42 Impairment, No dEmentia (the Cog-VACCINE study): study protocol for a randomized
- 43 controlled trial. *Trials* 2016;**17**(1):392
- 44
- 45 54. Reisberg B, Prichep L, Mosconi L, et al. The pre-mild cognitive impairment, subjective cognitive
- 46 impairment stage of Alzheimer's disease. *Alzheimer's & dementia : the journal of the Alzheimer's*
- 47 *Association* 2008;**4**(1 Suppl 1):S98-S108
- 48
- 49
- 50
- 51
- 52
- 53
- 54
- 55
- 56
- 57
- 58
- 59
- 60

1  
2  
3  
4  
5  
6  
7  
8  
9  
10  
11  
12  
13  
14  
15  
16  
17  
18  
19  
20  
21  
22  
23  
24  
25  
26  
27  
28  
29  
30  
31  
32  
33  
34  
35  
36  
37  
38  
39  
40  
41  
42  
43  
44  
45  
46  
47  
48  
49  
50  
51  
52  
53  
54  
55  
56  
57  
58  
59  
60



Flow chart.

80x93mm (300 x 300 DPI)





Location of acupoints or sham acupoints in the trial. Abbreviation: SA Sham acupoint, DU20 Baihui, DU24 Shengting, DU16 Fengfu, GB20 Fengchi, RN17 Danzhong, RN12 Zhongwan, RN6 Qihai, PC6 Neiguan, HT5 Tongli, SP10 Xuehai, ST36 Zusanli, KI6 Zhaohai, BL15 Xinshu, BL45 Yixi.

160x105mm (300 x 300 DPI)





| Study period              |          |        |                 |                    |
|---------------------------|----------|--------|-----------------|--------------------|
| Items                     | Baseline |        | Treatment phase | Outcome assessment |
| Time point                | -1 week  | 0 week | 1- 12 weeks     | 13-14 weeks        |
| <b>Enrolment</b>          |          |        |                 |                    |
| Eligibility screen        | X        |        |                 |                    |
| Informed consent          | X        |        |                 |                    |
| Examination               |          | X      |                 |                    |
| Randomization             |          | X      |                 |                    |
| <b>Intervention</b>       |          |        |                 |                    |
| Acupuncture (n = 30)      |          |        | X               |                    |
| Sham acupuncture (n = 30) |          |        | X               |                    |
| <b>MRI scan</b>           |          |        |                 |                    |
| Acupuncture               |          | X      |                 | X                  |
| Sham acupuncture          |          | X      |                 | X                  |
| <b>Assessment</b>         |          |        |                 |                    |
| AFT                       |          | X      |                 | X                  |
| TMT                       |          | X      |                 | X                  |
| DSST                      |          | X      |                 | X                  |
| SCWT                      |          | X      |                 | X                  |
| AVLT                      |          | X      |                 | X                  |
| SCDQ                      |          | X      |                 | X                  |
| SBSDS                     |          | X      |                 | X                  |
| HAMD                      |          | X      |                 | X                  |
| HAMA                      |          | X      |                 | X                  |
| PSQI                      |          | X      |                 | X                  |
| <b>Safety</b>             |          |        |                 |                    |
| Laboratory test           |          | X      |                 | X                  |
| Adverse events            |          |        | X               | X                  |

Standard Protocol Items: Recommendations for Interventional Trials (SPIRIT) schedule of the trial.

80x73mm (300 x 300 DPI)

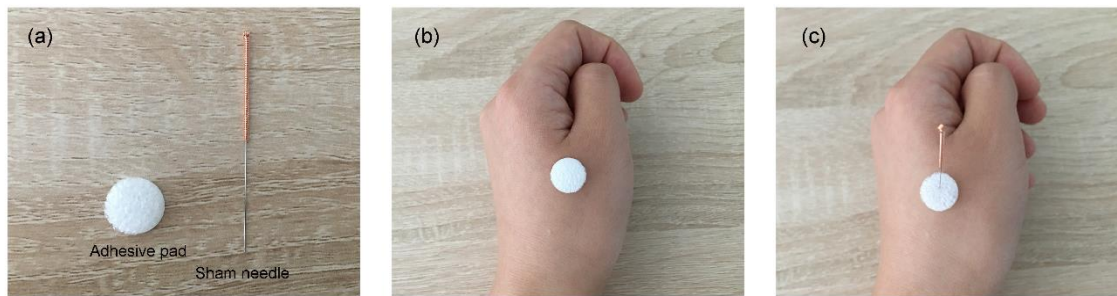

Supplement figure 1. Pictures of sham needle. (a) The adhesive pad and sham needle with a blunt tip; (b) The adhesive pad is pasted on the surface of skin; (c) The sham needle is placed on the adhesive pad.

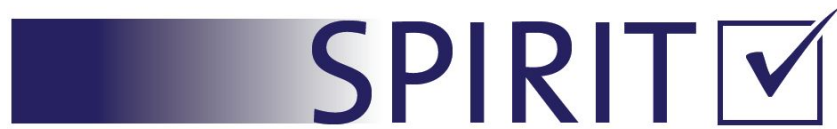

STANDARD PROTOCOL ITEMS: RECOMMENDATIONS FOR INTERVENTIONAL TRIALS

## SPIRIT 2013 Checklist: Recommended items to address in a clinical trial protocol and related documents\*

| Section/item                      | Item No | Description                                                                                                                                                                                                                                                                              | Page          |
|-----------------------------------|---------|------------------------------------------------------------------------------------------------------------------------------------------------------------------------------------------------------------------------------------------------------------------------------------------|---------------|
| <b>Administrative information</b> |         |                                                                                                                                                                                                                                                                                          |               |
| Title                             | 1       | Descriptive title identifying the study design, population, interventions, and, if applicable, trial acronym                                                                                                                                                                             | 5             |
| Trial registration                | 2a      | Trial identifier and registry name. If not yet registered, name of intended registry                                                                                                                                                                                                     | 5             |
|                                   | 2b      | All items from the World Health Organization Trial Registration Data Set                                                                                                                                                                                                                 | Not statement |
| Protocol version                  | 3       | Date and version identifier                                                                                                                                                                                                                                                              | 5             |
| Funding                           | 4       | Sources and types of financial, material, and other support                                                                                                                                                                                                                              | 16            |
| Roles and responsibilities        | 5a      | Names, affiliations, and roles of protocol contributors                                                                                                                                                                                                                                  | 5,14          |
|                                   | 5b      | Name and contact information for the trial sponsor                                                                                                                                                                                                                                       | 1             |
|                                   | 5c      | Role of study sponsor and funders, if any, in study design; collection, management, analysis, and interpretation of data; writing of the report; and the decision to submit the report for publication, including whether they will have ultimate authority over any of these activities | 14            |
|                                   | 5d      | Composition, roles, and responsibilities of the coordinating centre, steering committee, endpoint adjudication committee, data management team, and other individuals or groups overseeing the trial, if applicable (see Item 21a for data monitoring committee)                         | 11,12         |

## SPIRIT 2013 Checklist: Recommended items to address in a clinical trial protocol and related documents\*(continued)

| Section/item                                              | Item No | Description                                                                                                                                                                                               | Page |
|-----------------------------------------------------------|---------|-----------------------------------------------------------------------------------------------------------------------------------------------------------------------------------------------------------|------|
| <b>Introduction</b>                                       |         |                                                                                                                                                                                                           |      |
| Background and rationale                                  | 6a      | Description of research question and justification for undertaking the trial, including summary of relevant studies (published and unpublished) examining benefits and harms for each intervention        | 3-4  |
|                                                           | 6b      | Explanation for choice of comparators                                                                                                                                                                     | 4    |
| Objectives                                                | 7       | Specific objectives or hypotheses                                                                                                                                                                         | 4    |
| Trial design                                              | 8       | Description of trial design including type of trial (eg, parallel group, crossover, factorial, single group), allocation ratio, and framework (eg, superiority, equivalence, noninferiority, exploratory) | 5    |
| <b>Methods: Participants, interventions, and outcomes</b> |         |                                                                                                                                                                                                           |      |
| Study setting                                             | 9       | Description of study settings (eg, community clinic, academic hospital) and list of countries where data will be collected. Reference to where list of study sites can be obtained                        | 5    |
| Eligibility criteria                                      | 10      | Inclusion and exclusion criteria for participants. If applicable, eligibility criteria for study centres and individuals who will perform the interventions (eg, surgeons, psychotherapists)              | 6    |
| Interventions                                             | 11a     | Interventions for each group with sufficient detail to allow replication, including how and when they will be administered                                                                                | 7-8  |
|                                                           | 11b     | Criteria for discontinuing or modifying allocated interventions for a given trial participant (eg, drug dose change in response to harms, participant request, or improving/worsening disease)            | 8    |

**SPIRIT 2013 Checklist: Recommended items to address in a clinical trial protocol and related documents\*(continued)**

| Section/item                                                        | Item No | Description                                                                                                                                                                                                                                                                                                                                                                    | Page               |
|---------------------------------------------------------------------|---------|--------------------------------------------------------------------------------------------------------------------------------------------------------------------------------------------------------------------------------------------------------------------------------------------------------------------------------------------------------------------------------|--------------------|
|                                                                     | 11c     | Strategies to improve adherence to intervention protocols, and any procedures for monitoring adherence (eg, drug tablet return, laboratory tests)                                                                                                                                                                                                                              | 11                 |
|                                                                     | 11d     | Relevant concomitant care and interventions that are permitted or prohibited during the trial                                                                                                                                                                                                                                                                                  | 8                  |
| Outcomes                                                            | 12      | Primary, secondary, and other outcomes, including the specific measurement variable (eg, systolic blood pressure), analysis metric (eg, change from baseline, final value, time to event), method of aggregation (eg, median, proportion), and time point for each outcome. Explanation of the clinical relevance of chosen efficacy and harm outcomes is strongly recommended | 9–11               |
| Participant timeline                                                | 13      | Time schedule of enrolment, interventions (including any run-ins and washouts), assessments, and visits for participants. A schematic diagram is highly recommended (see Figure)                                                                                                                                                                                               | Figure 1, Figure 4 |
| Sample size                                                         | 14      | Estimated number of participants needed to achieve study objectives and how it was determined, including clinical and statistical assumptions supporting any sample size calculations                                                                                                                                                                                          | 11,12              |
| Recruitment                                                         | 15      | Strategies for achieving adequate participant enrolment to reach target sample size                                                                                                                                                                                                                                                                                            | 5                  |
| <b>Methods: Assignment of interventions (for controlled trials)</b> |         |                                                                                                                                                                                                                                                                                                                                                                                |                    |
| Allocation:                                                         |         |                                                                                                                                                                                                                                                                                                                                                                                |                    |
| Sequence generation                                                 | 16a     | Method of generating the allocation sequence (eg, computer-generated random numbers), and list of any factors for stratification. To reduce predictability of a random sequence, details of any planned restriction (eg, blocking) should be provided in a separate document that is unavailable to those who enrol participants or assign interventions                       | 12                 |

**SPIRIT 2013 Checklist: Recommended items to address in a clinical trial protocol and related documents\*(continued)**

| Section/item                                              | Item No | Description                                                                                                                                                                                                                                                                                                                                                                                                  | Page           |
|-----------------------------------------------------------|---------|--------------------------------------------------------------------------------------------------------------------------------------------------------------------------------------------------------------------------------------------------------------------------------------------------------------------------------------------------------------------------------------------------------------|----------------|
| Allocation concealment mechanism                          | 16b     | Mechanism of implementing the allocation sequence (eg, central telephone; sequentially numbered, opaque, sealed envelopes), describing any steps to conceal the sequence until interventions are assigned                                                                                                                                                                                                    | 12             |
| Implementation                                            | 16c     | Who will generate the allocation sequence, who will enrol participants, and who will assign participants to interventions                                                                                                                                                                                                                                                                                    | 12             |
| Blinding (masking)                                        | 17a     | Who will be blinded after assignment to interventions (eg, trial participants, care providers, outcome assessors, data analysts), and how                                                                                                                                                                                                                                                                    | 12             |
|                                                           | 17b     | If blinded, circumstances under which unblinding is permissible, and procedure for revealing a participant's allocated intervention during the trial                                                                                                                                                                                                                                                         | Not applicable |
| <b>Methods: Data collection, management, and analysis</b> |         |                                                                                                                                                                                                                                                                                                                                                                                                              |                |
| Data collection methods                                   | 18a     | Plans for assessment and collection of outcome, baseline, and other trial data, including any related processes to promote data quality (eg, duplicate measurements, training of assessors) and a description of study instruments (eg, questionnaires, laboratory tests) along with their reliability and validity, if known. Reference to where data collection forms can be found, if not in the protocol | 12-13          |
|                                                           | 18b     | Plans to promote participant retention and complete follow-up, including list of any outcome data to be collected for participants who discontinue or deviate from intervention protocols                                                                                                                                                                                                                    | Not applicable |
| Data management                                           | 19      | Plans for data entry, coding, security, and storage, including any related processes to promote data quality (eg, double data entry; range checks for data values). Reference to where details of data management procedures can be found, if not in the protocol                                                                                                                                            | 12-13          |
| Statistical methods                                       | 20a     | Statistical methods for analysing primary and secondary outcomes. Reference to where other details of the statistical analysis plan can be found, if not in the protocol                                                                                                                                                                                                                                     | 13-14          |

**SPIRIT 2013 Checklist: Recommended items to address in a clinical trial protocol and related documents\*(continued)**



| Section/item                                                                                                              | Item No | Description                                                                                                                                                                                                                                                                                                                           | Page           |
|---------------------------------------------------------------------------------------------------------------------------|---------|---------------------------------------------------------------------------------------------------------------------------------------------------------------------------------------------------------------------------------------------------------------------------------------------------------------------------------------|----------------|
|                                                                                                                           | 20b     | Methods for any additional analyses (eg, subgroup and adjusted analyses)                                                                                                                                                                                                                                                              | 13-14          |
|                                                                                                                           | 20c     | Definition of analysis population relating to protocol non-adherence (eg, as randomised analysis), and any statistical methods to handle missing data (eg, multiple imputation)                                                                                                                                                       | 13             |
| <b>Methods: Monitoring</b>                                                                                                |         |                                                                                                                                                                                                                                                                                                                                       |                |
| Data monitoring                                                                                                           | 21a     | Composition of data monitoring committee (DMC); summary of its role and reporting structure; statement of whether it is independent from the sponsor and competing interests; and reference to where further details about its charter can be found, if not in the protocol. Alternatively, an explanation of why a DMC is not needed | Not statement  |
|                                                                                                                           | 21b     | Description of any interim analyses and stopping guidelines, including who will have access to these interim results and make the final decision to terminate the trial                                                                                                                                                               | 8              |
| Harms                                                                                                                     | 22      | Plans for collecting, assessing, reporting, and managing solicited and spontaneously reported adverse events and other unintended effects of trial interventions or trial conduct                                                                                                                                                     | 11             |
| Auditing                                                                                                                  | 23      | Frequency and procedures for auditing trial conduct, if any, and whether the process will be independent from investigators and the sponsor                                                                                                                                                                                           | Not applicable |
| <b>Ethics and dissemination</b>                                                                                           |         |                                                                                                                                                                                                                                                                                                                                       |                |
| Research ethics approval                                                                                                  | 24      | Plans for seeking research ethics committee/institutional review board (REC/IRB) approval                                                                                                                                                                                                                                             | 5              |
| Protocol amendments                                                                                                       | 25      | Plans for communicating important protocol modifications (eg, changes to eligibility criteria, outcomes, analyses) to relevant parties (eg, investigators, REC/IRBs, trial participants, trial registries, journals, regulators)                                                                                                      | 5              |
| <b>SPIRIT 2013 Checklist: Recommended items to address in a clinical trial protocol and related documents*(continued)</b> |         |                                                                                                                                                                                                                                                                                                                                       |                |

| Section/item                  | Item No | Description                                                                                                                                                                                                                                                                         | Page           |
|-------------------------------|---------|-------------------------------------------------------------------------------------------------------------------------------------------------------------------------------------------------------------------------------------------------------------------------------------|----------------|
| Consent or assent             | 26a     | Who will obtain informed consent or assent from potential trial participants or authorised surrogates, and how (see Item 32)                                                                                                                                                        | 6              |
|                               | 26b     | Additional consent provisions for collection and use of participant data and biological specimens in ancillary studies, if applicable                                                                                                                                               | 6              |
| Confidentiality               | 27      | How personal information about potential and enrolled participants will be collected, shared, and maintained in order to protect confidentiality before, during, and after the trial                                                                                                | 12-13          |
| Declaration of interests      | 28      | Financial and other competing interests for principal investigators for the overall trial and each study site                                                                                                                                                                       | 16             |
| Access to data                | 29      | Statement of who will have access to the final trial dataset, and disclosure of contractual agreements that limit such access for investigators                                                                                                                                     | 16             |
| Ancillary and post-trial care | 30      | Provisions, if any, for ancillary and post-trial care, and for compensation to those who suffer harm from trial participation                                                                                                                                                       | Not applicable |
| Dissemination policy          | 31a     | Plans for investigators and sponsor to communicate trial results to participants, healthcare professionals, the public, and other relevant groups (eg, via publication, reporting in results databases, or other data sharing arrangements), including any publication restrictions | 14             |
|                               | 31b     | Authorship eligibility guidelines and any intended use of professional writers                                                                                                                                                                                                      | Not applicable |
|                               | 31c     | Plans, if any, for granting public access to the full protocol, participant-level dataset, and statistical code                                                                                                                                                                     | Not applicable |

---

**SPIRIT 2013 Checklist: Recommended items to address in a clinical trial protocol and related documents\*(continued)**


---

| Section/item               | Item No | Description                                                                                                                                                                                    | Page                        |
|----------------------------|---------|------------------------------------------------------------------------------------------------------------------------------------------------------------------------------------------------|-----------------------------|
| <b>Appendices</b>          |         |                                                                                                                                                                                                |                             |
| Informed consent materials | 32      | Model consent form and other related documentation given to participants and authorised surrogates                                                                                             | Not offer in the manuscript |
| Biological specimens       | 33      | Plans for collection, laboratory evaluation, and storage of biological specimens for genetic or molecular analysis in the current trial and for future use in ancillary studies, if applicable | Not applicable              |

\*It is strongly recommended that this checklist be read in conjunction with the SPIRIT 2013 Explanation & Elaboration for important clarification on the items. Amendments to the protocol should be tracked and dated. The SPIRIT checklist is copyrighted by the SPIRIT Group under the Creative Commons "[Attribution-NonCommercial-NoDerivs 3.0 Unported](https://creativecommons.org/licenses/by-nc-nd/3.0/)" license.
