# Supplementary material for: Efficacy and neural mechanism of acupuncture treatment in older adults with subjective cognitive decline: study protocol for a randomised controlled clinical trial
Source: PubMed Central journal article supplement — BMJ Open. 2019 Oct 10;9(10):e028317. doi: 10.1136/bmjopen-2018-028317 (PMC6797373; doi:10.1136/bmjopen-2018-028317), 2019-10-10
Supplement: bmjopen-2018-028317supp001.pdf [file bmjopen-2018-028317supp001.pdf]

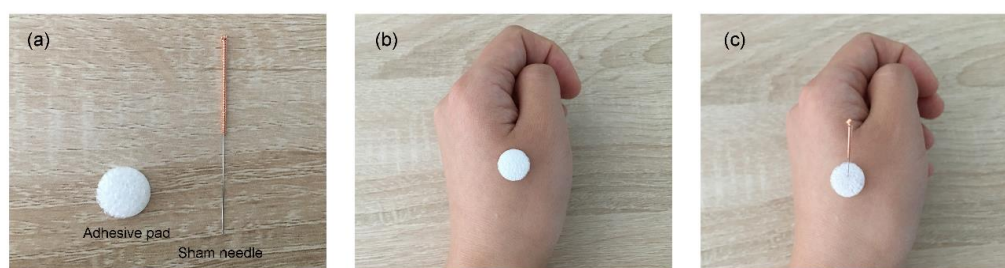

Supplement figure 1. Pictures of sham needle. (a) The adhesive pad and sham needle with a blunt tip; (b) The adhesive pad is pasted on the surface of skin; (c) The sham needle is placed on the adhesive pad.
